# Supplementary material for: Prevalence and correlates of physical violence and rape among female sex workers in Ethiopia: a cross-sectional study with respondent-driven sampling from 11 major towns
Source: PubMed Central journal article supplement — BMJ Open. 2019 Jul 30;9(7):e028247. doi: 10.1136/bmjopen-2018-028247 (PMC6678027; doi:10.1136/bmjopen-2018-028247), 2019-07-30
Supplement: bmjopen-2018-028247.draft_revisions.pdf [file bmjopen-2018-028247.draft_revisions.pdf]

# BMJ Open

BMJ Open is committed to open peer review. As part of this commitment we make the peer review history of every article we publish publicly available.

When an article is published we post the peer reviewers' comments and the authors' responses online. We also post the versions of the paper that were used during peer review. These are the versions that the peer review comments apply to.

The versions of the paper that follow are the versions that were submitted during the peer review process. They are not the versions of record or the final published versions. They should not be cited or distributed as the published version of this manuscript.

BMJ Open is an open access journal and the full, final, typeset and author-corrected version of record of the manuscript is available on our site with no access controls, subscription charges or pay-per-view fees (<http://bmjopen.bmj.com>).

If you have any questions on BMJ Open's open peer review process please email [info.bmjopen@bmj.com](mailto:info.bmjopen@bmj.com)

# BMJ Open

## Prevalence and correlates of physical violence and rape among female sex workers in Ethiopia: A respondent-driven sampling study from 11 major towns

|                               |                                                                                                                                                                                                                               |
|-------------------------------|-------------------------------------------------------------------------------------------------------------------------------------------------------------------------------------------------------------------------------|
| Journal:                      | <i>BMJ Open</i>                                                                                                                                                                                                               |
| Manuscript ID                 | bmjopen-2018-028247                                                                                                                                                                                                           |
| Article Type:                 | Research                                                                                                                                                                                                                      |
| Date Submitted by the Author: | 28-Nov-2018                                                                                                                                                                                                                   |
| Complete List of Authors:     | Amogne, Minilik; Lunds Universitet, social medicin and global health; Ethiopian Public Health Institute, TB/HIV Department<br>Balcha, Taye; Armauer Hansen Research Institute<br>Agardh, Anette; Lund Univ, Clinical Sciences |
| Keywords:                     | female sex workers, physical violence, rape, Substance use, Ethiopia                                                                                                                                                          |
|                               |                                                                                                                                                                                                                               |

SCHOLARONE™  
Manuscripts

# Prevalence and correlates of physical violence and rape among female sex workers in Ethiopia: A respondent-driven sampling study from 11 major towns

Minilik Demissie Amogne<sup>1,2</sup>, Taye Tolera Balcha<sup>3</sup>, Anette Agardh<sup>1</sup>

## Author affiliation

1. Social Medicine and Global Health, Department of Clinical Sciences Malmö, Lund University, Malmö, Sweden
2. Ethiopian public health institute, Addis Ababa, Ethiopia
3. Armauer Hansen Research Institute, Addis Ababa, Ethiopia

## Corresponding author

Minilik Demissie Amogne, [minilik\\_demissie.amogne@med.lu.se](mailto:minilik_demissie.amogne@med.lu.se)

## Abstract

**Objective:** This study examined the prevalence and correlates of physical violence and rape among FSWs in Ethiopia.

**Design:** A cross-sectional study using respondent-driven sampling was conducted among 4900 FSWs in 11 major towns in Ethiopia in 2014. A structured interview was performed, and blood specimens for HIV, and CD4 testing were collected. Data were examined using descriptive statistics and multiple logistic regression analyses.

**Results:** Among FSWs, 17.5% reported physical beating within the past year and 15.2% reported rape since they started selling sex. FSWs aged 35+ years (AOR 0.59, 95% CI 0.38, 0.92) were less exposed to physical beating than those aged 15-24 years. FSWs working on the street (AOR 1.92, 95% CI 1.53, 2.39), in red-light houses (AOR 1.63, 95% CI 1.12, 2.38) and in local drinking houses (AOR 1.35, 95% CI 1.02, 1.78) were more exposed to physical beating than FSWs working in bars/hotels. FSWs who consumed alcohol four or more days in a week (AOR 1.92, 95% CI 1.21, 3.04), or who chewed khat frequently were significantly more exposed to physical violence. Rape was associated with having a low monthly income, drinking alcohol four or more days per week (AOR 2.33, 95% CI 1.47, 3.7), experience of heavy episodic drinking in a month (AOR 1.71, 95% CI 1.24, 2.38), and chewing khat 3-4 days per week (AOR 2.15, 95% CI 1.55, 2.98). Condom breakage was more frequent among FSWs who reported both physical beating (AOR 1.51, 95% CI 1.25, 1.84) and rape (AOR 1.26, 95% CI 1.03, 1.55).

**Conclusion:** FSWs in Ethiopia are vulnerable to physical and sexual violence, and the risk increases when they are younger, street-based, and high consumers of alcohol or khat. Therefore, targeted efforts are needed for prevention and harm reduction.

**Key words:** female sex workers, physical violence, rape, substance use, Ethiopia

## Strengths and limitations of this study

- One of the strengths of this study is that it involves multiple sites (eleven large towns) across the country with a large sample size.
- The second strength is the sampling technique; the study used a respondent-driven sampling technique which is recommended for hard to reach populations.
- However, the study also had limitations. First, sexual and physical violence are sensitive topics that are subject to underreporting because of social desirability bias.
- Second, recall bias could occur because participants were asked about physical violence in the past year and rape since they start selling sex.

## Introduction

As per WHO definition, violence is the intentional use of physical force or power against another person or group, which has a high likelihood of resulting in injury, death, or sexual or psychological harm (1). Violence against women is a global phenomenon, as more than one in three women worldwide is beaten, coerced into sex or abused in her lifetime (2). Furthermore, violence is one of the main contributors to poor sexual and reproductive health among women, leading to unintended pregnancy, self-induced abortions, gynecologic problems, sexual dysfunction, and sexually transmitted infections (STIs), including HIV (3, 4).

In most countries, female sex work is either illegal or has an uncertain legal status; for example, prostitution is not illegal but approaching sex workers in public is illegal; this makes authorities reluctant to offer protection or support, which in turn legitimizes violence and discrimination against sex workers (5). In the case of Ethiopia, it is illegal to operate a brothel or procure sex workers as a commercial activity, but the sale of sex by women is neither prohibited nor legally recognized as a profession (6). Female sex workers (FSWs) frequently face harassment and violence, not only because of their illegitimate status, but also as a manifestation of gender inequality and discrimination directed towards women (7, 8).

Violence against FSWs can be perpetrated by anyone, including policemen, intimate partners, and clients. In Adama and Mekelle towns in Ethiopia, nearly 60% and 75% of female sex workers, respectively, reported lifetime violence (9, 10). In the same study in Adama, 8% of

1  
2  
3 FSW reported forced sex since they started sex work (10). In another study conducted among  
4 homeless street females in Bahirdar town, 11.4% of them reported having been raped during the  
5 last one year period (11). In Uganda, 40% of FSWs reported physical abuse and 49 % had been  
6 raped at least once in their lifetime (12). In another study conducted in Hunan, China and  
7 Karnataka, India, 16% and 9% of female sex workers, respectively, reported work-related  
8 violence (13, 14).  
9

14  
15 Several risk factors have been found to have an association with physical and sexual violence  
16 against FSWs. Socio-economic characteristics, risky sexual behaviors and substance abuse are  
17 the most mentioned factors worldwide (9, 10, 15, 16). A randomized controlled trial study in  
18 Kenya and South Africa showed that alcohol consumption reduction by FSWs had a significant  
19 contribution to violence reduction (17, 18). Moreover, establishments where alcohol and other  
20 drugs are consumed, associates with an increased likelihood of people becoming violent towards  
21 sex workers (8, 19). However, other studies suggest that FSWs who work outdoors face more  
22 violence than those who work indoors (20, 21).  
23  
24  
25  
26  
27  
28

29  
30 Violence towards FSWs may also be associated with condom use and condom breakage. Studies  
31 conducted among FSWs have found several intentional and unintentional factors associated with  
32 condom breakages during sex work. These factors included being drunk or high on drugs,  
33 wearing unfitting condoms, incorrect condom use, and having violent or rough sex(22, 23).  
34 Moreover, violence towards FSWs may also be linked to disagreement over condom use, which  
35 increases the risk of acquiring HIV and other STIs (21, 24-26). In Ethiopia, the weighted HIV  
36 prevalence among FSWs is estimated to be 23% (27), while it is 1.2 % in the general population  
37 (28), which shows the magnitude of the potential risk exposure among FSWs. In addition,  
38 violence also prevents sex workers from seeking appropriate health services (26, 29, 30).  
39  
40  
41  
42  
43  
44  
45

46 In general, 120,000 to 160,000 FSWs are estimated to live in Ethiopia, working in different  
47 venues, mainly in bars and hotels, Key-mebrat (red lighthouses), local drinking houses, and on  
48 the street (27). Currently, the number of female sex workers is growing, with increasing numbers  
49 of young girls entering the sex trade.  
50  
51  
52  
53  
54  
55

1  
2  
3 This study explores the prevalence and correlates of physical violence and rape among FSWs in  
4 Ethiopia. Successful strategies for handling the trauma may vary by the type of violence  
5 experienced. Therefore, identification of risk factors that are specific to various types of violence  
6 has the potential to inform the development of evidence-based prevention programs. In addition,  
7 generating such types of evidence based on national level data will help to promote more  
8 effective prevention for female sex workers.  
9  
10  
11  
12  
13

## 14 **Methods**

### 15 **Study design**

16  
17 This study was part of a larger study concerning HIV prevalence and related risk factors among  
18 female sex workers and long distance drivers that was carried out in Ethiopia in 2014. A cross-  
19 sectional study design using Respondent Driven Sampling technique (RDS) was used for data  
20 collection. RDS is a complex sampling method based on a chain-referral design and  
21 recommended for hard-to-reach populations. In all 11 towns included as study locations, initial  
22 FSW “seeds” were selected to start the sampling process. Seeds were selected purposively to  
23 represent the type of sex worker, age category, and geographic location. They were identified  
24 through formative assessments with key stakeholders working with FSWs and representatives of  
25 FSWs. The selected seeds were those who were well-connected with their community and  
26 reported large social networks.  
27  
28  
29  
30  
31  
32  
33  
34  
35

36 A maximum of three recruits per seed was allowed and only one-time participation was ensured  
37 by using a fingerprint scanning device. Recruitment pattern (who recruited whom) was tracked  
38 and network size was also determined.  
39  
40  
41

### 42 **Study area, period and population**

43 The study locations were the seven major regional towns and the four main transport corridor  
44 towns. The seven major regional towns were: Addis Ababa, Bahirdar, Mekelle, Hawassa,  
45 Adama, Gambela, and Dire-dawa. The four transport corridor towns were Semera-Logia (Addis  
46 Ababa-Djibouti route), Kombolcha (Addis Ababa-Mekelle route), Metema (Addis Ababa-  
47 Metema route) and Shashemene (Addis Ababa -Moyale route).  
48  
49  
50  
51  
52  
53  
54

1  
2  
3 The source populations were all female sex workers living in those selected eleven towns. For  
4 the purpose of the study, female sex workers were defined as follows: ‘women who practice  
5 sexual activity with the pre-conditions of financial or in-kind benefits’. The inclusion criteria  
6 were: receiving money or other benefits for sex with four or more people within the last 30 days,  
7 being 15 and above years old, properly recruited by a peer (present with the coupon) and giving  
8 consent both for the interview and blood drawing.  
9  
10  
11  
12  
13

### 14 **Sample size**

15  
16 The source study protocol calculated sample size of 400 female sex workers in each town using  
17 anticipated HIV prevalence of 25%, 6% precision, 95% CI and design effect of two. However,  
18 the number of female sex workers who participated in each town was not exactly 400, and the  
19 total number of FSWs who participated in the study was 4900.  
20  
21  
22  
23

### 24 **Data collection procedure**

25  
26 Six seed FSWs were selected to initiate coupon-based recruitment. Eligible FSWs who provided  
27 informed consent to participate were administered a face to face interview in a private room by a  
28 nurse with a structured questionnaire in Amharic language. They then provided blood specimens  
29 for HIV, CD4 and viral load testing in a private room. When the process was completed,  
30 participants were provided with up to three coupons and instructed to recruit their FSW peers  
31 into the study. To compensate the time and costs of transport, a primary incentive of 100 ETB  
32 (\$5.0) and additional 50 ETB (\$2.5) for each eligible peer she enrolled into the study was given.  
33 An electronic data base for tracking coupons and recruitment was established with participant  
34 ID, fingerprint code, and a pre-printed label that was scanned. The data collection tools and  
35 questionnaire were pretested in a pilot study; feedbacks from the pilot study was used to finalize  
36 the data collection tools and field logistic and operational procedures. The questionnaire  
37 included: socio-demographic characteristics, sexual risk exposure, sexual behaviors, condom  
38 use, history of STI symptoms, alcohol and drug use consumption, violence related issues,  
39 knowledge of HIV transmission, and HIV testing history.  
40  
41  
42  
43  
44  
45  
46  
47  
48  
49  
50  
51  
52  
53  
54  
55

## Variables

Violence was assessed with two dependent variables, which were physical beating during the last one year and rape since sex selling started. The following questions were asked: “When exchanging sex for money during the last one year, have you ever been physically beaten by a sexual partner or client?” and “Have you ever been raped or forced to have sex against your will since you start selling sex?” responses were dichotomized into a Yes and No variable for analysis. For both of the questions, all who had reported beating and rape at least once were considered as exposed to violence (Yes).

The independent measures included current age, monthly income from selling sex, marital status, educational status, sex selling venue, khat chewing, alcohol drinking, HIV status, and condom breakage.

Current age was a continuous variable and for the purpose of analysis was categorized as ten year intervals: younger (15-24), middle age (25-34), and older one (35+), with the younger age group used as the reference category. Monthly income from selling sex was an open-ended question and for the analysis was categorized in to 1000Birr (\$50) intervals considering the cost of living in the country. Educational status was categorized as no formal education, primary first cycle (grade 1-4), primary second cycle (grade 5-8), and secondary and above for analysis, in accordance with the country education system.

In addition, sex workers were categorized based on their sex selling venue, where bar/hotel was used as the reference because it is the most common FSW working venue. In addition, this venue category has better security than the other venues and the numbers of FSWs in this category were higher than the rest.

Alcohol consumption was measured through different approaches including frequency of alcohol consumption, number of drinks per specific day and frequency of heavy episodic drinking (6 or more standard drinks per day). Khat chewing was assessed according to the frequency of days they chewed in a week.



### Data analysis

Statistical analysis was performed using SPSS Version 20. Descriptive statistics were used to provide summary measures (means, frequencies). Odds ratios (crude and adjusted) and 95% confidence intervals (CI) were obtained using bivariate and multivariate logistic regression analysis. Those independent variables significantly associated with the outcome variable in the bivariate analysis were included in the multivariate analysis. Cases with missing data were excluded from the analyses. Significance was accepted at p-value <0.05.

### Ethical considerations

Permission for data use was obtained from the Ethiopian Public Health Institute (EPHI). The protocol was cleared at the Scientific and Ethical Research Office (SERO) of EPHI, the Ethiopian Science and Technology Ministry Ethical Committee, and CDC-Atlanta IRB. Individual written informed consent was obtained from each participant for the interview and blood sample collection while the study was conducted.

## Results

### Socio-demographic and other background characteristics

A total of 4900 female sex workers participated in the study. Demographic, socioeconomic and other background characteristics of the participants are shown in Table 1. The majority of the participants were between 15 to 24 years old with a mean age of 24 years (SD= 5.7); 44 % of them were divorced, separated or widowed. A quarter of them reported being uneducated and 40% of them earned on average less than \$50 per month. Regarding sex selling starting age, the majority started selling sex between the ages of 18-24 years, although nearly 25% started before the age of 18. FSWs worked in different eating, drinking and recreation establishments and also other venues; 33% recruited their clients in bars/hotels, followed by 26.5% on the street and 20% in local drinking houses (Table 1).

**Table 1. Distribution of socio-demographic and other background characteristics among 4900 female sex workers across eleven towns, Ethiopia**

| Variable | Frequency | Percentage |
|----------|-----------|------------|
|----------|-----------|------------|

|                                                          |      |       |
|----------------------------------------------------------|------|-------|
| <b>Age</b>                                               |      |       |
| 15-24                                                    | 2831 | 57.8  |
| 25-34                                                    | 1700 | 34.7  |
| 35+                                                      | 369  | 7.5   |
| Total                                                    | 4900 | 100.0 |
| Missing                                                  | 0    |       |
| <b>Mean age of respondents = 24.16</b><br><b>SD= 5.7</b> |      |       |
| <b>Educational status</b>                                |      |       |
| No Education                                             | 1224 | 25.0  |
| Primary 1st cycle (1-4)                                  | 764  | 16.0  |
| Primary 2nd cycle (5-8)                                  | 2062 | 42.0  |
| Secondary & above                                        | 831  | 17.0  |
| Total                                                    | 4881 | 100.0 |
| Missing                                                  | 19   |       |
| <b>Sex selling venues</b>                                |      |       |
| Bar/Hotel                                                | 1613 | 33.0  |
| Local drinking houses                                    | 983  | 20.1  |
| Spa/Massage/Beauty salon/Own house                       | 261  | 5.3   |
| Red Light houses                                         | 429  | 8.8   |
| Street                                                   | 1295 | 26.5  |
| Others                                                   | 304  | 6.2   |
| Total                                                    | 4885 | 100.0 |
| Missing                                                  | 15   |       |
| <b>Current marital status</b>                            |      |       |
| Never Married                                            | 2698 | 55.2  |
| Married/Cohabited                                        | 37   | 0.8   |
| Separated/Divorced                                       | 1976 | 40.5  |
| Widowed                                                  | 173  | 3.5   |
| Total                                                    | 4884 | 100.0 |
| Missing                                                  | 16   |       |
| <b>Sex selling starting age</b>                          |      |       |
| Less than 15                                             | 120  | 2.5   |
| 15 - 17                                                  | 1088 | 22.3  |
| 18 - 24                                                  | 2864 | 58.7  |
| 25 - 29                                                  | 583  | 12.0  |
| 30 & Above                                               | 220  | 4.5   |
| Total                                                    | 4875 | 100.0 |

|                                        |      |       |
|----------------------------------------|------|-------|
| Missing                                | 25   |       |
| <b>Monthly income from selling sex</b> |      |       |
| Less than 1000 (<\$50)                 | 1932 | 39.6  |
| 1001 – 2000 (\$50-\$100)               | 1554 | 31.8  |
| 2001 – 3000 (\$100-\$150)              | 812  | 16.6  |
| 3001 – 4000 (\$150-\$200)              | 318  | 6.5   |
| 4001 – 5000 (\$200-\$250)              | 150  | 3.1   |
| Above 5000 (>\$250)                    | 117  | 2.4   |
| Total                                  | 4883 | 100.0 |
| Missing                                | 17   |       |

### Behavioral and other related factors

Table 2 shows the prevalence of behavioral and other factors. The majority (70%) of the respondents consumed alcohol and of those, 15.8% had drunk so much on a typical day within the past 30 days that they did not remember what happened the next day. About half of the respondents chewed khat and 23.8% of them chewed almost every day (5-7 days a week).

Regarding condom use, 25.5% of them reported condom breakage within the past 30 days prior to the study. HIV/AIDS status of the respondents was also assessed and a quarter of them (23%) were HIV positive. With regard to physical and sexual violence experience, 17.5% of them reported physical beating within the past 12 months and 15.2% reported having been raped since they started selling sex. (Table 2)

**Table 2. Behavioral and other related factors among 4900 female sex workers across eleven towns, Ethiopia**

| Variable                                          | Frequency | Percentage |
|---------------------------------------------------|-----------|------------|
| <b>Frequency alcohol consumption</b>              |           |            |
| Never                                             | 1493      | 30.6       |
| Once a month or less                              | 222       | 4.5        |
| 2 - 4 days a month                                | 492       | 10.1       |
| 2 - 3 days a week                                 | 1394      | 28.5       |
| 4 or more days a week                             | 1283      | 26.3       |
| Total                                             | 4884      | 100.0      |
| Missing                                           | 16        |            |
| <b>Alcohol containing drinks on a typical day</b> |           |            |
| 1 or 2                                            | 806       | 23.8       |

|                                                                      |      |       |
|----------------------------------------------------------------------|------|-------|
| 3 or 4                                                               | 1383 | 40.8  |
| 5 or 6                                                               | 742  | 21.9  |
| 7 to 9                                                               | 296  | 8.7   |
| 10 or more                                                           | 164  | 4.8   |
| Total                                                                | 3391 | 100.0 |
| Missing                                                              | 0    |       |
| <b>Frequency of heavy episodic drinking</b>                          |      |       |
| Never                                                                | 1863 | 54.9  |
| Less than monthly                                                    | 236  | 7.0   |
| Monthly                                                              | 299  | 8.8   |
| Weekly                                                               | 630  | 18.6  |
| Daily or almost daily                                                | 363  | 10.7  |
| Total                                                                | 3391 | 100.0 |
| Missing                                                              | 0    |       |
| <b>Drunk so much and can't remember what happened the next day</b>   |      |       |
| Yes, in last 30 days                                                 | 534  | 15.8  |
| Yes, not in last 30 days                                             | 233  | 6.9   |
| No                                                                   | 2609 | 77.2  |
| Don't remember                                                       | 4    | 0.1   |
| Total                                                                | 3380 | 100.0 |
| Missing                                                              | 11   |       |
| <b>Frequency of khat chewing</b>                                     |      |       |
| Never                                                                | 2431 | 49.8  |
| Less than once a week                                                | 577  | 11.8  |
| 1-2 days per week                                                    | 429  | 8.8   |
| 3-4 days per week                                                    | 284  | 5.8   |
| 5-7 days per week                                                    | 1162 | 23.8  |
| Total                                                                | 4883 | 100.0 |
| Missing                                                              | 17   |       |
| <b>Condom breakage in the past 30 days</b>                           |      |       |
| Yes                                                                  | 1243 | 25.5  |
| No                                                                   | 3635 | 74.5  |
| Total                                                                | 4878 |       |
| Missing                                                              | 22   |       |
| <b>HIV status</b>                                                    |      |       |
| Negative                                                             | 3708 | 76.0  |
| Positive                                                             | 1173 | 24.0  |
| Total                                                                | 4881 | 100.0 |
| Missing                                                              | 19   |       |
| <b>Ever been raped or forced to have sex since start selling sex</b> |      |       |
| No                                                                   | 4142 | 84.8  |
| Yes                                                                  | 742  | 15.2  |
| Total                                                                | 4884 | 100.0 |

|                                                |      |       |
|------------------------------------------------|------|-------|
| Missing                                        | 16   |       |
| <b>Physically beaten in the last 12 months</b> |      |       |
| No                                             | 4026 | 82.5  |
| Yes                                            | 855  | 17.5  |
| Total                                          | 4881 | 100.0 |
| Missing                                        | 19   |       |

### Bivariate regression analysis outcome

Table 3 shows the bivariate logistic regression results; each independent variable was analyzed separately against the two outcome variables. The variables that were significantly associated with physical violence were: age, educational level, monthly income, current marital status, sex selling venues, frequency of alcohol consumption, alcohol containing drinks on a typical day, frequency of heavy episodic drinking, frequency of khat chewing in a week and condom breakage. Variables significantly associated with rape were: educational level, income from selling sex, frequency of alcohol consumption, alcohol containing drinks on a typical day, frequency of heavy episodic drinking, frequency of khat chewing in a week and condom breakage. HIV status was not significantly associated with either physical violence or rape.

**Table 3. Bivariate logistic regression analyses results of independent variables associated with physically beaten in the last 12 months and ever been raped since start selling sex, odds ratio (OR) and 95% confidence intervals (CI)**

| Variables                              | Physical beating<br>OR (95% CI) | Rape<br>OR (95% CI) |
|----------------------------------------|---------------------------------|---------------------|
| <b>Age</b>                             |                                 |                     |
| 15-24*                                 |                                 |                     |
| 25-34                                  | 1.02 (0.87, 1.19)               | 1.02 (0.86, 1.21)   |
| 35+                                    | 0.52 (0.37, 0.74)               | 0.88 (0.64, 1.20)   |
| <b>Educational level</b>               |                                 |                     |
| No Education*                          |                                 |                     |
| Primary 1st cycle (1-4)                | 1.01 (0.79, 1.31)               | 1.45 (1.14, 1.85)   |
| Primary 2nd cycle (5-8)                | 1.35 (1.11, 1.63)               | 1.08 (0.88, 1.32)   |
| Secondary & above                      | 1.49 (1.18, 1.87)               | 1.09 (0.85, 1.41)   |
| <b>Monthly income from selling sex</b> |                                 |                     |
| Less than 1000 birr (<\$50) *          |                                 |                     |
| 1001 – 2000 birr (\$50-\$100)          | 1.44 (1.20, 1.73)               | 0.69 (0.58, 0.85)   |

|                                |                   |                   |
|--------------------------------|-------------------|-------------------|
| 2001 – 3000 birr (\$100-\$150) | 1.67 (1.35, 2.07) | 0.51 (0.39, 0.66) |
| 3001 – 4000 birr (\$150-\$200) | 1.61 (1.19, 2.17) | 0.65 (0.46, 0.92) |
| 4001 – 5000 birr (\$200-\$250) | 2.12 (1.44, 3.14) | 1.01 (0.66, 1.55) |
| Above 5000 birr (>\$250)       | 1.62 (1.01, 2.58) | 0.75 (0.44, 1.27) |

### Current marital status

|                    |                   |                   |
|--------------------|-------------------|-------------------|
| Never Married*     |                   |                   |
| Married/Cohabited  | 1.05 (0.46, 2.41) | 0.69 (0.24, 1.96) |
| Separated/Divorced | 0.93 (0.80, 1.09) | 1.03 (0.88, 1.21) |
| Widowed            | 0.59 (0.37, 0.95) | 1.39 (0.95, 2.06) |

### Sex selling venues

|                                    |                   |   |
|------------------------------------|-------------------|---|
| Bar/Hotel*                         |                   |   |
| Local drinking houses              | 0.87 (0.69, 1.09) | - |
| Spa/Massage/Beauty salon/Own house | 0.45 (0.28, 0.71) | - |
| Red Light houses                   | 0.95 (0.71, 1.27) | - |
| Street                             | 1.51 (1.26, 1.82) | - |
| Others                             | 1.37 (1.01, 1.86) | - |

### Frequency alcohol consumption

|                       |                   |                   |
|-----------------------|-------------------|-------------------|
| Never*                |                   |                   |
| 2 - 4 days a month    | 1.82 (1.35, 2.44) | 1.74 (1.27, 2.38) |
| 2 - 3 days a week     | 2.07 (1.66, 2.57) | 1.87 (1.48, 2.36) |
| 4 or more days a week | 3.54 (2.87, 4.37) | 3.43 (2.75, 4.28) |

### Alcohol containing drinks on a typical day

|            |                   |                   |
|------------|-------------------|-------------------|
| 1 or 2*    |                   |                   |
| 3 or 4     | 1.39 (1.09, 1.76) | 1.16 (0.92, 1.46) |
| 5 or 6     | 2.03 (1.58, 2.62) | 1.09 (0.84, 1.43) |
| 7 to 9     | 2.19 (1.59, 3.03) | 0.98 (0.68, 1.41) |
| 10 or more | 2.76 (1.88, 4.03) | 1.78 (1.20, 2.65) |

### Frequency of heavy episodic drinking

|                       |                   |                   |
|-----------------------|-------------------|-------------------|
| Never*                |                   |                   |
| Less than monthly     | 1.43 (1.03, 1.98) | 1.39 (0.99, 1.95) |
| Monthly               | 1.23 (0.90, 1.66) | 1.59 (1.18, 2.13) |
| Weekly                | 1.73 (1.39, 2.14) | 1.03 (0.80, 1.31) |
| Daily or almost daily | 1.97 (1.53, 2.55) | 1.69 (1.29, 2.21) |

### Drunk so much and can't remember what happened the next day

|                          |                   |                   |
|--------------------------|-------------------|-------------------|
| No*                      |                   |                   |
| Yes, in the last 30 days | 2.90 (2.37, 3.56) | 1.66 (1.33, 2.07) |
| Yes, before last 30 days | 2.22 (1.65, 2.99) | 1.27 (0.91, 1.78) |

### Frequency of khat chewing in a week

|    |                        |                   |                   |
|----|------------------------|-------------------|-------------------|
| 1  |                        |                   |                   |
| 2  |                        |                   |                   |
| 3  | Never*                 |                   |                   |
| 4  | Less than once a week  | 1.24 (0.96, 1.60) | 0.89 (0.67, 1.19) |
| 5  | 1-2 days per week      | 1.67 (1.28, 2.18) | 2.89 (2.26, 3.69) |
| 6  | 3-4 days per week      | 2.49 (1.87, 3.34) | 2.92 (2.19, 3.89) |
| 7  | 5-7 days per week      | 2.48 (2.08, 2.96) | 1.47 (1.21, 1.79) |
| 8  |                        |                   |                   |
| 9  |                        |                   |                   |
| 10 | <b>Condom breakage</b> |                   |                   |
| 11 | No*                    |                   |                   |
| 12 | Yes                    | 1.99 (1.69,2.33)  | 1.62 (1.37, 1.92) |
| 13 |                        |                   |                   |
| 14 | <b>HIV test result</b> |                   |                   |
| 15 | Negative*              |                   |                   |
| 16 | Positive               | 1.04 (0.88, 1.24) | 0.88 (0.73, 1.07) |
| 17 |                        |                   |                   |

18 **Note: \* Reference category**

### 20 **Multivariate analysis of factors associated with physical violence (physically beaten)**

21 Table 4 shows the results of the multivariate analysis used to identify factors associated with  
 22 physical violence after simultaneously adjusting for all measures included in the analyses.  
 23 Female sex workers aged 35 years or above (AOR 0.59, 95% CI 0.38, 0.92) were significantly  
 24 less exposed to physical violence when compared with the younger age group (15-24 years).  
 25 FSWs who attend primary 1st cycle education (AOR 0.71, 95% CI 0.52, 0.97) were also less  
 26 exposed to physical beating than those who report no education. On the other hand, FSWs who  
 27 worked on the street (AOR 1.92, 95% CI 1.53, 2.39), in red-light houses (AOR 1.63,95% CI  
 28 1.12, 2.38) and in local drinking houses (AOR 1.35, 95% CI 1.02, 1.78) were more exposed to  
 29 physical violence compared with FSWs who worked in bars/hotels. Moreover, substance use was  
 30 significantly related to physical violence exposure. FSWs who consumed alcohol four or more  
 31 days in a week (AOR 1.92, 95% CI 1.21, 3.04), those who did not remember what happened the  
 32 next day due to heavy alcohol consumption both in the past 30 days (AOR 1.98, 95% CI 1.58,  
 33 2.49), and before past 30 days (AOR 1.85, 95% CI 1.35, 2.53), FSWs who chewed khat 3-4 days  
 34 per week (AOR 1.58, 95% CI 1.13, 2.21) and 5-7 days per week (AOR 1.43, 95% CI 1.13, 1.80)  
 35 were significantly more exposed to physical violence. Condom breakage experience within the  
 36 past 30 days prior to the study was also significantly associated with physical violence (AOR  
 37 1.51, 95% CI 1.25, 1.84).  
 38  
 39  
 40  
 41  
 42  
 43  
 44  
 45  
 46  
 47  
 48  
 49  
 50

**Table 4. Multivariate logistic regression analysis of factors associated with physical violence (physically beaten) in the past twelve month among female sex workers across eleven towns in Ethiopia, odds ratios (OR) and 95% confidence intervals (CI).**

| Variables                                         | OR (95% CI)       |
|---------------------------------------------------|-------------------|
| <b>Age</b>                                        |                   |
| 15-24*                                            |                   |
| 25-34                                             | 1.04 (0.82, 1.22) |
| 35+                                               | 0.59 (0.38, 0.92) |
| <b>Educational level</b>                          |                   |
| No Education*                                     |                   |
| Primary 1st cycle (1-4)                           | 0.71 (0.52, 0.97) |
| Primary 2nd cycle (5-8)                           | 0.98 (0.77, 1.26) |
| Secondary & above                                 | 1.14 (0.85, 1.53) |
| <b>Monthly income from selling sex</b>            |                   |
| Less than 1000 birr (<\$50) *                     |                   |
| 1001 – 2000 birr (\$50-\$100)                     | 1.13 (0.90, 1.41) |
| 2001 – 3000 birr (\$100-\$150)                    | 1.14 (0.87, 1.48) |
| 3001 – 4000 birr (\$150-\$200)                    | 1.12 (0.77, 1.61) |
| 4001 – 5000 birr (\$200-\$250)                    | 1.44 (0.93, 2.24) |
| Above 5000 birr (>\$250)                          | 1.12 (0.63, 1.99) |
| <b>Current marital status</b>                     |                   |
| Never Married*                                    |                   |
| Married/Cohabited                                 | 0.68 (0.24, 1.89) |
| Separated/Divorced                                | 1.08 (0.88, 1.29) |
| Widowed                                           | 0.87 (0.48, 1.59) |
| <b>Sex selling venues</b>                         |                   |
| Bar/Hotel*                                        |                   |
| Local drinking houses                             | 1.35 (1.02, 1.78) |
| Spa/massage/beauty salon/own house                | 1.04 (0.58, 1.84) |
| Red Light houses                                  | 1.63 (1.12, 2.38) |
| Street                                            | 1.92 (1.53, 2.39) |
| Others                                            | 1.39 (0.98, 1.99) |
| <b>Frequency alcohol consumption</b>              |                   |
| Never*                                            |                   |
| 2 - 4 days a month                                | 1.25 (0.77, 2.04) |
| 2 - 3 days a week                                 | 1.32 (0.84, 2.06) |
| 4 or more days a week                             | 1.92 (1.21, 3.04) |
| <b>Alcohol containing drinks on a typical day</b> |                   |
| 1 or 2*                                           |                   |



|                                                                    |                   |
|--------------------------------------------------------------------|-------------------|
| 3 or 4                                                             | 1.08 (0.84, 1.39) |
| 5 or 6                                                             | 1.15 (0.85, 1.57) |
| 7 to 9                                                             | 1.09 (0.74, 1.64) |
| 10 or more                                                         | 1.14 (0.72, 1.81) |
| <b>Frequency of heavy episodic drinking</b>                        |                   |
| Never*                                                             |                   |
| Less than monthly                                                  | 1.07 (0.75, 1.52) |
| Monthly                                                            | 0.84 (0.59, 1.18) |
| Weekly                                                             | 1.07 (0.82, 1.39) |
| Daily or almost daily                                              | 0.99 (0.71, 1.38) |
| <b>Drunk so much and can't remember what happened the next day</b> |                   |
| No*                                                                |                   |
| Yes, in the last 30 days                                           | 1.98 (1.58, 2.49) |
| Yes, before last 30 days                                           | 1.85 (1.35, 2.53) |
| <b>Frequency of khat chewing in a week</b>                         |                   |
| Never*                                                             |                   |
| Less than once a week                                              | 1.04 (0.77, 1.42) |
| 1-2 days per week                                                  | 1.30 (0.96, 1.77) |
| 3-4 days per week                                                  | 1.58 (1.13, 2.21) |
| 5-7 days per week                                                  | 1.43 (1.13, 1.80) |
| <b>Condom breakage</b>                                             |                   |
| No*                                                                |                   |
| Yes                                                                | 1.51 (1.25, 1.84) |

---

**Note: \* Reference category**

### **Multivariate analysis of factors associated with sexual violence (rape)**

Table 5 shows the results of the multivariate logistic regression analyses to identify factors that were significantly associated with rape after simultaneously adjusting for all measures included in the analyses. Female sex workers with a monthly income of \$50 to \$200 were significantly less exposed to rape compared to those with a monthly income of below \$50. Drinking alcohol four or more days per week (AOR 2.33, 95% CI 1.47, 3.7), those with experience of heavy drinking in the last 30 days and did not remember what happened the next day (AOR 1.34, 95% CI 1.05, 1.72), experience of HED in a month (AOR 1.71, 95% CI 1.24, 2.38), experience of HED almost daily (AOR 1.49, 95% CI 1.06, 2.11) and chewing khat 1-2 days (AOR 2.13, 95% CI 1.61, 2.83) and 3-4 days (AOR 2.15, 95% CI 1.55, 2.98) per week were positively associated

with rape. Moreover, condom breakage (AOR 1.26, 95% CI 1.03, 1.55) was significantly more frequent among FSWs who reported rape.

**Table 5. Multivariate logistic regression analysis of factors associated with sexual violence (rape) since sex selling start among female sex workers across eleven towns in Ethiopia, odds ratios (OR) and 95% confidence intervals (CI).**

| Variables                                                          | OR (95% CI)       |
|--------------------------------------------------------------------|-------------------|
| <b>Monthly income from selling sex</b>                             |                   |
| Less than 1000 birr (<\$50) *                                      |                   |
| 1001 – 2000 birr (\$50-\$100)                                      | 0.62 (0.49, 0.77) |
| 2001 – 3000 birr (\$100-\$150)                                     | 0.42 (0.32, 0.57) |
| 3001 – 4000 birr (\$150-\$200)                                     | 0.45 (0.29, 0.69) |
| 4001 – 5000 birr (\$200-\$250)                                     | 0.84 (0.53, 1.33) |
| Above 5000 birr (>\$250)                                           | 0.62 (0.34, 1.15) |
| <b>Current marital status</b>                                      |                   |
| Never Married*                                                     |                   |
| Married/Cohabited                                                  | 0.57 (0.17, 1.97) |
| Separated/Divorced                                                 | 1.01 (0.83, 1.22) |
| Widowed                                                            | 1.61 (0.98, 2.63) |
| <b>Educational level</b>                                           |                   |
| No Education*                                                      |                   |
| Primary 1st cycle (1-4)                                            | 1.06 (0.79, 1.43) |
| Primary 2nd cycle (5-8)                                            | 0.83 (0.65, 1.07) |
| Secondary & above                                                  | 0.92 (0.68, 1.25) |
| <b>Frequency of alcohol consumption</b>                            |                   |
| Never*                                                             |                   |
| 2 - 4 days a month                                                 | 1.15(0.69, 1.89)  |
| 2 - 3 days a week                                                  | 1.24(0.78, 1.96)  |
| 4 or more days a week                                              | 2.33(1.47,3.73)   |
| <b>Drunk so much and can't remember what happened the next day</b> |                   |
| No*                                                                |                   |
| Yes, in the last 30 days                                           | 1.34 (1.05, 1.72) |
| Yes, before last 30 days                                           | 1.07 (0.75, 1.52) |
| <b>Frequency of heavy episodic drinking</b>                        |                   |
| Never*                                                             |                   |
| Less than monthly                                                  | 1.61 (1.12, 2.32) |
| Monthly                                                            | 1.71 (1.24, 2.38) |
| Weekly                                                             | 1.04 (0.78, 1.38) |

|                                            |                   |
|--------------------------------------------|-------------------|
| Daily or almost daily                      | 1.49 (1.06, 2.11) |
| <b>Frequency of khat chewing in a week</b> |                   |
| Never*                                     |                   |
| less than once a week                      | 0.83 (0.59, 1.16) |
| 1-2 days per week                          | 2.13 (1.61, 2.83) |
| 3-4 days per week                          | 2.15 (1.55, 2.98) |
| 5-7 days per week                          | 1.06 (0.83, 1.36) |
| <b>Condom breakage</b>                     |                   |
| No*                                        |                   |
| Yes                                        | 1.26 (1.03, 1.55) |

---

**Note: \* Reference category**

## Discussion

According to this study, 17.5% of FSWs in Ethiopia had been physically beaten within the past 12 months and 15.2% had been raped since they start selling sex. Age, sex selling venues, and high consumption of alcohol and khat were significant predictors of physical violence (beating). On the other hand, the significant predictors of sexual violence (rape) were low income and also high consumption of alcohol and khat.

The prevalence of both physical violence and sexual violence (rape) was lower than prevalence found in studies conducted in Uganda, Ivory Coast, and Kenya (9, 12, 30, 31). However, when compared to the studies conducted in Adama (Ethiopia), China, India, and Mexico the current study reported a higher prevalence of both physical and sexual violence (10, 11, 13, 14, 32). The difference in the definition of violence used might be one of the possible explanations for the difference between the current results and those found in other studies in Africa. Most of the studies assessed all forms of physical and sexual violence while the current study assessed solely physical beating and forced penetrative sex (rape). On the other hand, differences in results across settings might also be due to differences in background and contextual factors such as socio-economic status and cultural aspects.

1  
2  
3 Several studies showed that younger FSWs are more exposed to physical and sexual violence  
4 (13, 33) in line with the current findings that younger FSWs (15-24 years) were at higher risk for  
5 physical violence when compared to their older counter parts (35+ years). The lack of experience  
6 in identifying perpetrators and the perpetrator approach towards young FSWs may play a role in  
7 increased exposure to violence.  
8  
9  
10

11  
12  
13 Even though sex work is not a legally recognized profession in Ethiopia, most of the  
14 establishments where the sex workers are based (hotels, bars/restaurants, night clubs etc.) operate  
15 legally with working licenses. Nevertheless, some FSWs work on the street and in red-light  
16 houses where they manage their own working area. Consequently, the levels of exposure to  
17 physical violence vary according to their working area. The present study revealed that FSWs  
18 who mainly work in bar and hotels face less physical beating when compared with FSWs who  
19 work on the street, in red-light houses and local drinking houses. This finding is in line with the  
20 studies conducted in New York City and England (20, 21). This might be due to the level of  
21 protection in their working areas and/or due to the type of clients who frequents those localities.  
22  
23  
24  
25  
26  
27  
28

29  
30 Furthermore, an association between alcohol use and higher frequency of physical violence and  
31 rape was reported. In particular, FSWs who consume alcohol more than four days a week and  
32 those with experience of HED were significantly exposed to violence. Several studies conducted  
33 in Ethiopia, Uganda, and Kenya also reported similar findings (9, 10, 12, 19). High level of  
34 alcohol consumption places FSWs in disadvantaged situations by intensifying their vulnerability  
35 (8). Research reviews also report that alcohol use impairs FSWs' ability to detect the risk of  
36 violence and increases their vulnerability to risk-prone situations (34, 35)  
37  
38  
39  
40  
41  
42

43 Correspondingly, chewing khat more days in a week was significantly associated with exposure  
44 to physical violence and rape. Khat is a stimulant, and after chewing an individual may become  
45 talkative, alert, feel excitement, increased self-esteem, and increased imagination (36). After  
46 chewing khat, some of the users consume alcohol-containing drinks to decrease the level of  
47 stimulation. Although there is no study on the relationship between khat chewing and exposure  
48 to violence among FSWs, most FSWs chew khat before departing to work and drink alcohol  
49 during working hours to minimize the effect, which in turn exposes them to HED and violence.  
50  
51  
52  
53  
54  
55

1  
2  
3 In addition, the resistance to condom use from clients and the violence experience may create a  
4 difficult situation for FSWs with regard to proper use of condoms, which further exposes FSWs  
5 to HIV and other STIs. In this study there were a significant relationship between condom  
6 breakage and history of physical beating and rape. Even though there was no significant  
7 association between HIV and violence, the proportion of HIV positive FSWs in the sample was  
8 high (23%). A study conducted in Benin reported a similar finding concerning the association  
9 between condom breakage and violence, but unlike our study there was a significant association  
10 between HIV and violence experience (23).  
11  
12  
13  
14  
15  
16  
17

18 In general, there were some similarities but also differences concerning the predictors of rape  
19 and physical violence. For example, being in the younger age group was a significant predictor  
20 of physical beating but not for rape, and having lower income was associated with exposure to  
21 rape but not to physical beating. Nevertheless, based on the current data, it is difficult to draw  
22 any conclusions about why one variable would matter for physical beating but not for rape. The  
23 reasons underlying the differences are currently unknown, and further research might be required  
24 to gain an understanding of the patterns observed.  
25  
26  
27  
28  
29  
30

### 31 **Methodological considerations**

32  
33

34 There are a limited number of studies on violence among FSWs in Ethiopia and the existing  
35 studies are restricted to one city (9, 10). One of the strengths of this study is that it involves  
36 multiple sites (eleven large towns) across the country. The second strength is the sampling  
37 technique; the study used a respondent-driven sampling technique which is recommended for  
38 hard to reach populations and is believed to give a representative sample of the target population.  
39 The third strength is the assessment of their HIV status on site using the national testing  
40 algorithm. In addition, the pilot study conducted prior to the actual implementation added  
41 strength for the main study protocol.  
42  
43  
44  
45  
46  
47  
48

49 This study also had limitations. First, sexual and physical violence are sensitive topics that are  
50 subject to underreporting because of social desirability bias. Second, recall bias could occur  
51 because participants were asked about physical violence in the past year and rape since they start  
52  
53  
54

1  
2  
3 selling sex. We tried to minimize underreporting through intense interviewer training. In  
4 addition, since it is a cross-sectional study, participants are assessed only once; thus, it would be  
5 difficult to infer the temporal association between a risk factor and an outcome. In addition, the  
6 results regarding correlates of physical and sexual violence among FSWs in Ethiopia might have  
7 limited generalizability across settings. However, these results are likely to be relevant for other  
8 FSWs in other African countries that have a similar setting as Ethiopia, and may inform targeted  
9 prevention strategies for this key population.  
10  
11  
12  
13  
14  
15

## 16 **Conclusion**

17  
18 In general, FSWs are vulnerable to physical and sexual violence, and the risk increases when  
19 they are younger, street-based, and are high consumers of alcohol or khat. Therefore, to reduce  
20 physical and sexual violence, strategies to secure and improve their work environment should be  
21 a critical component of targeted interventions. Increasing awareness regarding the role of khat  
22 chewing and alcohol drinking towards vulnerability to violence should be an integral component  
23 of HIV prevention and violence reduction programs. In addition, targeted efforts should be made  
24 for the younger FSWs to reduce their vulnerability.  
25  
26  
27  
28  
29  
30

## 31 **Acknowledgments**

32 We would like to express gratitude to the study participants and the data collectors.

33 **Conflict of Interest:** None to declare.

## 34 **Authors contributions**

35 MA and AA developed the study design. MA analyzed and interpreted the data and drafted the  
36 manuscript. AA was involved in the data analysis and interpretation, and in the writing of the  
37 manuscript. TT was involved in the interpretation of the data and contributed to the writing of  
38 the manuscript. All authors approved the final manuscript.  
39  
40  
41  
42  
43  
44  
45

46 **Funding:** This research received no specific grant from any funding agency.

47 **Data sharing statement:** No additional data available.  
48  
49  
50

## 51 **Reference**

52  
53  
54  
55  
56  
57  
58  
59  
60

1. Jewkes R. Intimate partner violence: causes and prevention. *The lancet* 2002; 359 (9315): 1423-9.
2. World Health Organization, Global and regional estimates of violence against women: prevalence and health effects of intimate partner violence and non-partner sexual violence: executive summary.
3. Glasier A, Gulmezoglu AM, Schmid GP, Moreno CG, Van Look PF. Sexual and reproductive health: a matter of life and death. *The Lancet* 2006; 368 (9547):1595-607.
4. Perry A. Risk Factors of Gender-based Sexual Violence. *RTM Insights*;23.
5. Godwin J. *Sex Work and the Law in Asia and the Pacific*. Bangkok: United Nations Development Programme.
6. The Criminal Code of the Federal Democratic Republic of Ethiopia Article 634: (Proclamation No. 414/2004) 2004.
7. World Health Organization, *Addressing violence against women and achieving the Millennium Development Goals*. 2005.
8. World Health Organization, *Addressing Violence against Sex Workers* 2013.
9. Alemayehu M, Yohannes G, Damte A, Fantahun A, Gebrekirstos K, Tsegay R, et al. Prevalence and predictors of sexual violence among commercial sex workers in Northern Ethiopia. *Reproductive health* 2015; 12 (1):47.
10. Mooney A, Kidanu A, Bradley HM, Kumoji EK, Kennedy CE, Kerrigan D. Work-related violence and inconsistent condom use with non-paying partners among female sex workers in Adama City, Ethiopia. *BMC public health* 2013; 13 (1):771.
11. Misganaw AC, Worku YA. Assessment of sexual violence among street females in Bahir-Dar town, North West Ethiopia: a mixed method study. *BMC Public Health*; 13 (1): 825.
12. Schwitters A, Swaminathan M, Serwadda D, Muyonga M, Shiraishi RW, Benech I, et al. Prevalence of rape and client-initiated gender-based violence among female sex workers: Kampala, Uganda, 2012. *AIDS and Behavior*; 19 (1):68-76.
13. Beattie TS, Bhattacharjee P, Ramesh B, Gurnani V, Anthony J, Isac S, et al. Violence against female sex workers in Karnataka state, south India: impact on health, and reductions in violence following an intervention program. *BMC Public Health*. p. 476.
14. Kelvin EA, Sun X, Mantell JE, Zhou J, Mao J, Peng Y. Vulnerability to sexual violence and participation in sex work among high-end entertainment centre workers in Hunan Province, China. *Sexual health*;10 (5):391-9.
15. Wolffers I. Violence repression and other health threats. *Research for sex work* 2001;4:1-2.
16. Hanck SE, Blankenship KM, Irwin KS, West BS, Kershaw T. Assessment of self-reported sexual behavior and condom use among female sex workers in India using a polling box approach: a preliminary report. *Sexually transmitted diseases* 2008; 35 (5): 489-94.

17. Parcesepe AM, Kelly L, Martin SL, Green S, Sinkele W, Suchindran C, et al. The impact of an alcohol harm reduction intervention on interpersonal violence and engagement in sex work among female sex workers in Mombasa, Kenya: Results from a randomized controlled trial. *Drug and alcohol dependence*;161:21-8.
18. Wechsberg WM, Luseno WK, Lam WK, Parry CD, Morojele NK. Substance use, sexual risk, and violence: HIV prevention intervention with sex workers in Pretoria. *AIDS and Behavior* 2006; 10 (2):131.
19. Chersich M, Luchters S, Malonza I, Mwarogo P, King'Ola N, Temmerman M. Heavy episodic drinking among Kenyan female sex workers is associated with unsafe sex, sexual violence and sexually transmitted infections. *International journal of STD & AIDS*2007. p. 764-9.
20. Church S, Henderson M, Barnard M, Hart G. Violence by clients towards female prostitutes in different work settings: questionnaire survey. *Bmj*2001;322(7285):524-5.
21. El-Bassel N, Witte SS, Wada T, Gilbert L, Wallace J. Correlates of partner violence among female street-based sex workers: substance abuse, history of childhood abuse, and HIV risks. *AIDS patient care and STDs* 2001;15(1):41-51.
22. Masvawure TB, Mantell JE, Tocco JU, Gichangi P, Restar A, Chabeda SV, et al. Intentional and unintentional condom breakage and slippage in the sexual interactions of female and male sex workers and clients in Mombasa, Kenya. *AIDS and Behavior*; 22(2):637-48.
23. Tounkara FK, Diabata S, Guadou FA, Ahoussinou Cm, Kintin Fdr, Zannou DM, et al. Violence, condom breakage and HIV infection among female sex workers in Benin, West Africa. *Sexually transmitted diseases*; 41(5):312.
24. Choi SY, Chen KL, Jiang ZQ. Client-perpetuated violence and condom failure among female sex workers in southwestern China. *Sex Transm Dis* 2008.
25. Wilson KS, Deya R, Yuhas K, Simoni J, Vander Stoep A, Shafi J, et al. A prospective cohort study of intimate partner violence and unprotected sex in HIV-positive female sex workers in Mombasa, Kenya. *AIDS and Behavior*; 20(9):2054-64.
26. Okal J, Chersich MF, Tsui S, Sutherland E, Temmerman M, Luchters S. Sexual and physical violence against female sex workers in Kenya: a qualitative enquiry. *AIDS care*; 23 (5):612-8.
27. Ethiopian National Key Population HIV Bio-behavioral Surveillance Round I Report. 2013
28. HIV Related Estimates and Projections for Ethiopia-2015
29. Decker MR, Lyons C, Billong SC, Njindam IM, Grosso A, Nunez GT, et al. Gender-based violence against female sex workers in Cameroon: prevalence and associations with sexual HIV risk and access to health services and justice. *Sex Transm Infect*; 92 (8): 599-604.



- 1
- 2
- 3
- 4 30. Lyons CE, Grosso A, Drame FM, Ketende S, Diouf D, Ba I, et al. Physical and Sexual
- 5 Violence Affecting Female Sex Workers in Abidjan, Côte d'Ivoire: Prevalence, and the
- 6 Relationship with the Work Environment, HIV, and Access to Health Services. *JAIDS*
- 7 *Journal of Acquired Immune Deficiency Syndromes*; 75(1):9-17.
- 8
- 9 31. Wilson KS, Deya R, Masese L, Simoni JM, Stoep AV, Shafi J, et al. Prevalence and
- 10 correlates of intimate partner violence in HIV-positive women engaged in transactional
- 11 sex in Mombasa, Kenya. *International journal of STD & AIDS*;27(13):1194-203.
- 12
- 13 32. Semple SJ, Stockman JK, Pitpitani EV, Strathdee SA, Chavarin CV, Mendoza DV, et al.
- 14 Prevalence and correlates of client-perpetrated violence against female sex workers in 13
- 15 Mexican cities. *PloS one*;10(11):e0143317.
- 16
- 17 33. Silverman JG. Adolescent female sex workers: invisibility, violence and HIV. *Archives*
- 18 *of disease in childhood*:archdischild178715.
- 19
- 20 34. George WH, Stoner SA. Understanding acute alcohol effects on sexual behavior. *Annual*
- 21 *review of sex research*2000;11(1):92-124.
- 22
- 23 35. Mbonye M, Rutakumwa R, Weiss H, Seeley J. Alcohol consumption and high risk sexual
- 24 behaviour among female sex workers in Uganda. *African Journal of AIDS*
- 25 *Research*;13(2):145-51.
- 26
- 27 36. WHO. [http://www.who.int/medicines/areas/quality\\_safety/4.4KhatCritReview.pdf](http://www.who.int/medicines/areas/quality_safety/4.4KhatCritReview.pdf).
- 28
- 29
- 30
- 31
- 32
- 33
- 34
- 35
- 36
- 37
- 38
- 39
- 40
- 41
- 42
- 43
- 44
- 45
- 46
- 47
- 48
- 49
- 50
- 51
- 52
- 53
- 54
- 55
- 56
- 57
- 58
- 59
- 60

# Reporting checklist for cross sectional study.

Based on the STROBE cross sectional guidelines.

## Instructions to authors

Complete this checklist by entering the page numbers from your manuscript where readers will find each of the items listed below.

Your article may not currently address all the items on the checklist. Please modify your text to include the missing information. If you are certain that an item does not apply, please write "n/a" and provide a short explanation.

Upload your completed checklist as an extra file when you submit to a journal.

In your methods section, say that you used the STROBE cross sectional reporting guidelines, and cite them as:

von Elm E, Altman DG, Egger M, Pocock SJ, Gotsche PC, Vandenbroucke JP. The Strengthening the Reporting of Observational Studies in Epidemiology (STROBE) Statement: guidelines for reporting observational studies.

|          |                     |                                                                                                 | Page   |
|----------|---------------------|-------------------------------------------------------------------------------------------------|--------|
|          |                     | Reporting Item                                                                                  | Number |
| Title    | <a href="#">#1a</a> | Indicate the study's design with a commonly used term in the title or the abstract              | 1      |
| Abstract | <a href="#">#1b</a> | Provide in the abstract an informative and balanced summary of what was done and what was found | 1      |

|    |                      |                     |                                                                   |         |
|----|----------------------|---------------------|-------------------------------------------------------------------|---------|
| 1  | Background /         | <a href="#">#2</a>  | Explain the scientific background and rationale for the           | 2       |
| 2  |                      |                     |                                                                   |         |
| 3  | rationale            |                     | investigation being reported                                      |         |
| 4  |                      |                     |                                                                   |         |
| 5  |                      |                     |                                                                   |         |
| 6  | Objectives           | <a href="#">#3</a>  | State specific objectives, including any prespecified             | 3       |
| 7  |                      |                     | hypotheses                                                        |         |
| 8  |                      |                     |                                                                   |         |
| 9  |                      |                     |                                                                   |         |
| 10 |                      |                     |                                                                   |         |
| 11 | Study design         | <a href="#">#4</a>  | Present key elements of study design early in the paper           | 4       |
| 12 |                      |                     |                                                                   |         |
| 13 |                      |                     |                                                                   |         |
| 14 |                      |                     |                                                                   |         |
| 15 | Setting              | <a href="#">#5</a>  | Describe the setting, locations, and relevant dates, including    | 4, 5, 6 |
| 16 |                      |                     | periods of recruitment, exposure, follow-up, and data collection  |         |
| 17 |                      |                     |                                                                   |         |
| 18 |                      |                     |                                                                   |         |
| 19 |                      |                     |                                                                   |         |
| 20 | Eligibility criteria | <a href="#">#6a</a> | Give the eligibility criteria, and the sources and methods of     | 5       |
| 21 |                      |                     | selection of participants.                                        |         |
| 22 |                      |                     |                                                                   |         |
| 23 |                      |                     |                                                                   |         |
| 24 |                      |                     |                                                                   |         |
| 25 |                      |                     |                                                                   |         |
| 26 |                      | <a href="#">#7</a>  | Clearly define all outcomes, exposures, predictors, potential     | 6       |
| 27 |                      |                     | confounders, and effect modifiers. Give diagnostic criteria, if   |         |
| 28 |                      |                     | applicable                                                        |         |
| 29 |                      |                     |                                                                   |         |
| 30 |                      |                     |                                                                   |         |
| 31 |                      |                     |                                                                   |         |
| 32 |                      |                     |                                                                   |         |
| 33 | Data sources /       | <a href="#">#8</a>  | For each variable of interest give sources of data and details of | 6       |
| 34 | measurement          |                     | methods of assessment (measurement). Describe                     |         |
| 35 |                      |                     | comparability of assessment methods if there is more than one     |         |
| 36 |                      |                     | group. Give information separately for for exposed and            |         |
| 37 |                      |                     | unexposed groups if applicable.                                   |         |
| 38 |                      |                     |                                                                   |         |
| 39 |                      |                     |                                                                   |         |
| 40 |                      |                     |                                                                   |         |
| 41 |                      |                     |                                                                   |         |
| 42 |                      |                     |                                                                   |         |
| 43 |                      |                     |                                                                   |         |
| 44 |                      |                     |                                                                   |         |
| 45 | Bias                 | <a href="#">#9</a>  | Describe any efforts to address potential sources of bias         | 2, 18   |
| 46 |                      |                     |                                                                   |         |
| 47 |                      |                     |                                                                   |         |
| 48 | Study size           | <a href="#">#10</a> | Explain how the study size was arrived at                         | 5       |
| 49 |                      |                     |                                                                   |         |
| 50 |                      |                     |                                                                   |         |
| 51 | Quantitative         | <a href="#">#11</a> | Explain how quantitative variables were handled in the            | 6       |
| 52 | variables            |                     | analyses. If applicable, describe which groupings were chosen,    |         |
| 53 |                      |                     | and why                                                           |         |
| 54 |                      |                     |                                                                   |         |
| 55 |                      |                     |                                                                   |         |
| 56 |                      |                     |                                                                   |         |
| 57 |                      |                     |                                                                   |         |
| 58 |                      |                     |                                                                   |         |
| 59 |                      |                     |                                                                   |         |
| 60 |                      |                     |                                                                   |         |

|    |                     |                      |                                                                                                                                                                                                                                                                                |                |  |
|----|---------------------|----------------------|--------------------------------------------------------------------------------------------------------------------------------------------------------------------------------------------------------------------------------------------------------------------------------|----------------|--|
| 1  | Statistical methods | <a href="#">#12a</a> | Describe all statistical methods, including those used to control for confounding                                                                                                                                                                                              | 7              |  |
| 2  |                     |                      |                                                                                                                                                                                                                                                                                |                |  |
| 3  |                     |                      |                                                                                                                                                                                                                                                                                |                |  |
| 4  |                     |                      |                                                                                                                                                                                                                                                                                |                |  |
| 5  |                     |                      |                                                                                                                                                                                                                                                                                |                |  |
| 6  |                     |                      |                                                                                                                                                                                                                                                                                |                |  |
| 7  |                     | <a href="#">#12b</a> | Describe any methods used to examine subgroups and interactions                                                                                                                                                                                                                | NA             |  |
| 8  |                     |                      |                                                                                                                                                                                                                                                                                |                |  |
| 9  |                     |                      |                                                                                                                                                                                                                                                                                |                |  |
| 10 |                     |                      |                                                                                                                                                                                                                                                                                |                |  |
| 11 |                     |                      |                                                                                                                                                                                                                                                                                |                |  |
| 12 |                     | <a href="#">#12c</a> | Explain how missing data were addressed                                                                                                                                                                                                                                        | 8              |  |
| 13 |                     |                      |                                                                                                                                                                                                                                                                                |                |  |
| 14 |                     |                      |                                                                                                                                                                                                                                                                                |                |  |
| 15 |                     | <a href="#">#12d</a> | If applicable, describe analytical methods taking account of sampling strategy                                                                                                                                                                                                 | NA             |  |
| 16 |                     |                      |                                                                                                                                                                                                                                                                                |                |  |
| 17 |                     |                      |                                                                                                                                                                                                                                                                                |                |  |
| 18 |                     |                      |                                                                                                                                                                                                                                                                                |                |  |
| 19 |                     |                      |                                                                                                                                                                                                                                                                                |                |  |
| 20 |                     |                      |                                                                                                                                                                                                                                                                                |                |  |
| 21 |                     | <a href="#">#12e</a> | Describe any sensitivity analyses                                                                                                                                                                                                                                              | 7              |  |
| 22 |                     |                      |                                                                                                                                                                                                                                                                                |                |  |
| 23 | Participants        | <a href="#">#13a</a> | Report numbers of individuals at each stage of study—eg numbers potentially eligible, examined for eligibility, confirmed eligible, included in the study, completing follow-up, and analysed. Give information separately for for exposed and unexposed groups if applicable. | 5              |  |
| 24 |                     |                      |                                                                                                                                                                                                                                                                                |                |  |
| 25 |                     |                      |                                                                                                                                                                                                                                                                                |                |  |
| 26 |                     |                      |                                                                                                                                                                                                                                                                                |                |  |
| 27 |                     |                      |                                                                                                                                                                                                                                                                                |                |  |
| 28 |                     |                      |                                                                                                                                                                                                                                                                                |                |  |
| 29 |                     |                      |                                                                                                                                                                                                                                                                                |                |  |
| 30 |                     |                      |                                                                                                                                                                                                                                                                                |                |  |
| 31 |                     |                      |                                                                                                                                                                                                                                                                                |                |  |
| 32 |                     |                      |                                                                                                                                                                                                                                                                                |                |  |
| 33 |                     |                      |                                                                                                                                                                                                                                                                                |                |  |
| 34 |                     |                      |                                                                                                                                                                                                                                                                                |                |  |
| 35 |                     |                      |                                                                                                                                                                                                                                                                                |                |  |
| 36 |                     | <a href="#">#13b</a> | Give reasons for non-participation at each stage                                                                                                                                                                                                                               | 5              |  |
| 37 |                     |                      |                                                                                                                                                                                                                                                                                |                |  |
| 38 |                     |                      |                                                                                                                                                                                                                                                                                |                |  |
| 39 |                     | <a href="#">#13c</a> | Consider use of a flow diagram                                                                                                                                                                                                                                                 |                |  |
| 40 |                     |                      |                                                                                                                                                                                                                                                                                |                |  |
| 41 | Descriptive data    | <a href="#">#14a</a> | Give characteristics of study participants (eg demographic, clinical, social) and information on exposures and potential confounders. Give information separately for exposed and unexposed groups if applicable.                                                              |                |  |
| 42 |                     |                      |                                                                                                                                                                                                                                                                                |                |  |
| 43 |                     |                      |                                                                                                                                                                                                                                                                                |                |  |
| 44 |                     |                      |                                                                                                                                                                                                                                                                                |                |  |
| 45 |                     |                      |                                                                                                                                                                                                                                                                                |                |  |
| 46 |                     |                      |                                                                                                                                                                                                                                                                                |                |  |
| 47 |                     |                      |                                                                                                                                                                                                                                                                                |                |  |
| 48 |                     |                      |                                                                                                                                                                                                                                                                                |                |  |
| 49 |                     |                      |                                                                                                                                                                                                                                                                                |                |  |
| 50 |                     |                      |                                                                                                                                                                                                                                                                                |                |  |
| 51 |                     |                      |                                                                                                                                                                                                                                                                                |                |  |
| 52 |                     | <a href="#">#14b</a> | Indicate number of participants with missing data for each variable of interest                                                                                                                                                                                                | 8, 9 in tables |  |
| 53 |                     |                      |                                                                                                                                                                                                                                                                                |                |  |
| 54 |                     |                      |                                                                                                                                                                                                                                                                                |                |  |
| 55 |                     |                      |                                                                                                                                                                                                                                                                                |                |  |
| 56 | Outcome data        | <a href="#">#15</a>  | Report numbers of outcome events or summary measures.                                                                                                                                                                                                                          | na             |  |
| 57 |                     |                      |                                                                                                                                                                                                                                                                                |                |  |
| 58 |                     |                      |                                                                                                                                                                                                                                                                                |                |  |

|    |                  |                                                                                        |        |
|----|------------------|----------------------------------------------------------------------------------------|--------|
| 1  |                  | Give information separately for exposed and unexposed                                  |        |
| 2  |                  | groups if applicable.                                                                  |        |
| 3  |                  |                                                                                        |        |
| 4  |                  |                                                                                        |        |
| 5  |                  |                                                                                        |        |
| 6  | Main results     | <a href="#">#16a</a> Give unadjusted estimates and, if applicable, confounder-         | 7 - 10 |
| 7  |                  | adjusted estimates and their precision (eg, 95% confidence                             |        |
| 8  |                  | interval). Make clear which confounders were adjusted for and                          |        |
| 9  |                  | why they were included                                                                 |        |
| 10 |                  |                                                                                        |        |
| 11 |                  |                                                                                        |        |
| 12 |                  |                                                                                        |        |
| 13 |                  |                                                                                        |        |
| 14 |                  |                                                                                        |        |
| 15 |                  |                                                                                        |        |
| 16 |                  | <a href="#">#16b</a> Report category boundaries when continuous variables were         |        |
| 17 |                  | categorized                                                                            |        |
| 18 |                  |                                                                                        |        |
| 19 |                  |                                                                                        |        |
| 20 |                  |                                                                                        |        |
| 21 |                  | <a href="#">#16c</a> If relevant, consider translating estimates of relative risk into |        |
| 22 |                  | absolute risk for a meaningful time period                                             |        |
| 23 |                  |                                                                                        |        |
| 24 |                  |                                                                                        |        |
| 25 |                  |                                                                                        |        |
| 26 | Other analyses   | <a href="#">#17</a> Report other analyses done—e.g., analyses of subgroups and         | 10 -16 |
| 27 |                  | interactions, and sensitivity analyses                                                 |        |
| 28 |                  |                                                                                        |        |
| 29 |                  |                                                                                        |        |
| 30 |                  |                                                                                        |        |
| 31 |                  |                                                                                        |        |
| 32 | Key results      | <a href="#">#18</a> Summarise key results with reference to study objectives           |        |
| 33 |                  |                                                                                        |        |
| 34 |                  |                                                                                        |        |
| 35 | Limitations      | <a href="#">#19</a> Discuss limitations of the study, taking into account sources of   | 18     |
| 36 |                  | potential bias or imprecision. Discuss both direction and                              |        |
| 37 |                  | magnitude of any potential bias.                                                       |        |
| 38 |                  |                                                                                        |        |
| 39 |                  |                                                                                        |        |
| 40 |                  |                                                                                        |        |
| 41 |                  |                                                                                        |        |
| 42 |                  |                                                                                        |        |
| 43 | Interpretation   | <a href="#">#20</a> Give a cautious overall interpretation considering objectives,     | 16 -18 |
| 44 |                  | limitations, multiplicity of analyses, results from similar studies,                   |        |
| 45 |                  | and other relevant evidence.                                                           |        |
| 46 |                  |                                                                                        |        |
| 47 |                  |                                                                                        |        |
| 48 |                  |                                                                                        |        |
| 49 |                  |                                                                                        |        |
| 50 | Generalisability | <a href="#">#21</a> Discuss the generalisability (external validity) of the study      | 19     |
| 51 |                  | results                                                                                |        |
| 52 |                  |                                                                                        |        |
| 53 |                  |                                                                                        |        |
| 54 |                  |                                                                                        |        |
| 55 | Funding          | <a href="#">#22</a> Give the source of funding and the role of the funders for the     | 20     |
| 56 |                  | present study and, if applicable, for the original study on which                      |        |
| 57 |                  |                                                                                        |        |
| 58 |                  |                                                                                        |        |
| 59 |                  |                                                                                        |        |
| 60 |                  |                                                                                        |        |

1 the present article is based

2  
3 The STROBE checklist is distributed under the terms of the Creative Commons Attribution License  
4  
5  
6 CC-BY. This checklist can be completed online using <https://www.goodreports.org/>, a tool made by  
7  
8 the [EQUATOR Network](#) in collaboration with [Penelope.ai](#)  
9

10  
11  
12  
13  
14  
15  
16  
17  
18  
19  
20  
21  
22  
23  
24  
25  
26  
27  
28  
29  
30  
31  
32  
33  
34  
35  
36  
37  
38  
39  
40  
41  
42  
43  
44  
45  
46  
47  
48  
49  
50  
51  
52  
53  
54  
55  
56  
57  
58  
59  
60

For peer review only

# BMJ Open

## Prevalence and correlates of physical violence and rape among female sex workers in Ethiopia: A cross-sectional study with respondent-driven sampling from 11 major towns

|                                 |                                                                                                                                                                                                                               |
|---------------------------------|-------------------------------------------------------------------------------------------------------------------------------------------------------------------------------------------------------------------------------|
| Journal:                        | <i>BMJ Open</i>                                                                                                                                                                                                               |
| Manuscript ID                   | bmjopen-2018-028247.R1                                                                                                                                                                                                        |
| Article Type:                   | Research                                                                                                                                                                                                                      |
| Date Submitted by the Author:   | 12-Feb-2019                                                                                                                                                                                                                   |
| Complete List of Authors:       | Amogne, Minilik; Lunds Universitet, social medicin and global health; Ethiopian Public Health Institute, TB/HIV Department<br>Balcha, Taye; Armauer Hansen Research Institute<br>Agardh, Anette; Lund Univ, Clinical Sciences |
| <b>Primary Subject Heading</b>: | Public health                                                                                                                                                                                                                 |
| Secondary Subject Heading:      | Public health, Sexual health, HIV/AIDS, Epidemiology                                                                                                                                                                          |
| Keywords:                       | female sex workers, physical violence, rape, Substance use, Ethiopia                                                                                                                                                          |
|                                 |                                                                                                                                                                                                                               |

SCHOLARONE™  
Manuscripts

# Prevalence and correlates of physical violence and rape among female sex workers in Ethiopia: A cross-sectional study with respondent-driven sampling from 11 major towns

Minilik Demissie<sup>1,2</sup>, Taye Tolera Balcha<sup>3</sup>, Anette Agardh<sup>1</sup>

## Author affiliation

1. Social Medicine and Global Health, Department of Clinical Sciences Malmö, Lund University, Malmö, Sweden
2. Ethiopian public health institute, Addis Ababa, Ethiopia
3. Armauer Hansen Research Institute, Addis Ababa, Ethiopia

## Corresponding author

Minilik Demissie Amogne, [minilik\\_demissie@med.lu.se](mailto:minilik_demissie@med.lu.se) or [minewdem@gmail.com](mailto:minewdem@gmail.com)

## Abstract

**Objective:** This study examined the prevalence and correlates of physical violence and rape among FSWs in Ethiopia.

**Design:** A cross-sectional study using a respondent-driven sampling technique

**Setting:** Eleven major towns in Ethiopia

**Participants:** 4900 female sex workers (FSWs)

**Main outcome measures:** The prevalence of physical beating and rape and factors contributing

**Results:** Among FSWs, 17.5% reported physical beating within the past year and 15.2% reported rape since they started selling sex. FSWs aged 35+ years (AOR 0.59, 95% CI 0.38, 0.92) were less exposed to physical beating than those aged 15-24 years. FSWs working on the street (AOR 1.92, 95% CI 1.53, 2.39), in red-light houses (AOR 1.63, 95% CI 1.12, 2.38) and in local drinking houses (AOR 1.35, 95% CI 1.02, 1.78) experienced more physical beating than FSWs working in bars/hotels. FSWs who consumed alcohol four or more days in a week (AOR 1.92, 95% CI 1.21, 3.04), and who chewed khat frequently experienced more physical violence. Rape was associated with having a low monthly income, drinking alcohol four or more days per week (AOR 2.33, 95% CI 1.47, 3.7), experience of heavy episodic drinking in a month (AOR 1.71, 95% CI 1.24, 2.38), and chewing khat 3-4 days per week (AOR 2.15, 95% CI 1.55, 2.98). Condom breakage was more frequent among FSWs who reported both physical beating (AOR 1.51, 95% CI 1.25, 1.84) and rape (AOR 1.26, 95% CI 1.03, 1.55).

**Conclusion:** FSWs in Ethiopia are vulnerable to physical and sexual violence, and the risk increases when they are younger, street-based, and high consumers of alcohol or khat. Therefore, targeted efforts are needed for prevention and harm reduction.

**Keywords:** female sex workers, physical violence, rape, substance use, Ethiopia



## Strengths and limitations of this study

- The study involves multiple sites (eleven large towns) across the country with a large sample size.
- The study used a respondent-driven sampling technique which is recommended for hard to reach populations.
- Sexual and physical violence are sensitive topics that are subject to underreporting because of social desirability bias.
- Recall bias could occur because participants were asked about physical violence in the past year and rape since they start selling sex.
- Due to a cross-sectional study design, it would be difficult to infer the temporal association between a risk factor and an outcome

## Introduction

As per WHO definition, violence is the intentional use of physical force or power against another person or group, which has a high likelihood of resulting in injury, death, or sexual or psychological harm (1). Violence against women is a global phenomenon, as more than one in three women worldwide is beaten, coerced into sex or abused in her lifetime (2). Furthermore, violence is one of the main contributors to poor sexual and reproductive health among women, leading to unintended pregnancy, self-induced abortions, gynecologic problems, sexual dysfunction, and sexually transmitted infections (STIs), including HIV (3, 4).

In most countries, female sex work is either illegal or has an uncertain legal status; for example, prostitution is not illegal but approaching sex workers in public is illegal; this makes authorities reluctant to offer protection or support, which in turn legitimizes violence and discrimination against sex workers (5). In the case of Ethiopia, it is illegal to operate a brothel or procure sex workers as a commercial activity, but the sale of sex by women is neither prohibited nor legally recognized as a profession (6). Female sex workers (FSWs) frequently face harassment and violence, not only because of their illegitimate status, but also as a manifestation of gender inequality and discrimination directed towards women (7, 8).

1  
2  
3 Violence against FSWs can be perpetrated by anyone, including policemen, intimate partners,  
4 and clients. In Adama and Mekelle towns in Ethiopia, nearly 60% and 75% of female sex  
5 workers, respectively, reported lifetime violence (9, 10). In the same study in Adama, 8% of  
6 FSW reported forced sex since they started sex work (10). In another study conducted among  
7 homeless street females in Bahirdar town, 11.4% of them reported having been raped during the  
8 last one year period (11). In Uganda, 40% of FSWs reported physical abuse and 49 % had been  
9 raped at least once in their lifetime (12). In another study conducted in Hunan, China and  
10 Karnataka, India, 16% and 9% of female sex workers, respectively, reported work-related  
11 violence (13, 14).  
12  
13  
14  
15  
16  
17  
18  
19

20 Several risk factors have been found to have an association with physical and sexual violence  
21 against FSWs. Socio-economic characteristics, risky sexual behaviors and substance abuse are  
22 the most mentioned factors worldwide (9, 10, 15, 16). A randomized controlled trial study in  
23 Kenya and South Africa showed that alcohol consumption reduction by FSWs had a significant  
24 contribution to violence reduction (17, 18). Moreover, establishments where alcohol and other  
25 drugs are consumed, associates with an increased likelihood of people becoming violent towards  
26 sex workers (8, 19). However, other studies suggest that FSWs who work outdoors face more  
27 violence than those who work indoors (20, 21).  
28  
29  
30  
31  
32  
33  
34

35 Violence towards FSWs may also be associated with condom use and condom breakage. Studies  
36 conducted among FSWs have found several intentional and unintentional factors associated with  
37 condom breakages during sex work. These factors included being drunk or high on drugs,  
38 wearing unfitting condoms, incorrect condom use, and having violent or rough sex(22, 23).  
39 Moreover, violence towards FSWs may also be linked to disagreement over condom use, which  
40 increases the risk of acquiring HIV and other STIs (21, 24-26). In Ethiopia, the weighted HIV  
41 prevalence among FSWs is estimated to be 23% (27), while it is 1.2 % in the general population  
42 (28), which shows the magnitude of the potential risk exposure among FSWs. In addition,  
43 violence also prevents sex workers from seeking appropriate health services (26, 29, 30).  
44  
45  
46  
47  
48  
49  
50

51 In general, 120,000 to 160,000 FSWs are estimated to live in Ethiopia, working in different  
52 venues, mainly in bars and hotels, Key-mebrat (red lighthouses), local drinking houses, and on  
53  
54

1  
2  
3 the street (27). Currently, the number of female sex workers is growing, with increasing numbers  
4 of young girls entering the sex trade.  
5  
6

7 This study explores the prevalence and correlates of physical violence and rape among FSWs in  
8 Ethiopia. Successful strategies for handling the trauma may vary by the type of violence  
9 experienced. Therefore, identification of risk factors that are specific to various types of violence  
10 has the potential to inform the development of evidence-based prevention programs. In addition,  
11 generating such types of evidence based on national level data will help to promote more  
12 effective prevention for female sex workers.  
13  
14  
15  
16  
17

## 18 **Methods**

### 19 **Study design**

20 This study was part of a larger study concerning HIV prevalence and related risk factors among  
21 female sex workers and long distance drivers that was carried out in Ethiopia in 2014. A cross-  
22 sectional study design using Respondent Driven Sampling technique (RDS) was used for data  
23 collection. RDS is a complex sampling method based on a chain-referral design and  
24 recommended for hard-to-reach populations. In all 11 towns included as study locations, initial  
25 FSW “seeds” were selected to start the sampling process. Seeds were selected purposively to  
26 represent the type of sex worker, age category, and geographic location. They were identified  
27 through formative assessments with key stakeholders working with FSWs and representatives of  
28 FSWs. The selected seeds were those who were well-connected with their community and  
29 reported large social networks.  
30  
31  
32  
33  
34  
35  
36  
37  
38  
39

40 A maximum of three recruits per seed was allowed and only one-time participation was ensured  
41 by using a fingerprint scanning device. Recruitment pattern (who recruited whom) was tracked  
42 and network size was also determined.  
43  
44  
45

### 46 **Study area, period and population**

47 The study locations were the seven major regional towns and the four main transport corridor  
48 towns. The seven major regional towns were: Addis Ababa, Bahirdar, Mekelle, Hawassa,  
49 Adama, Gambela, and Dire-dawa. The four transport corridor towns were Semera-Logia (Addis  
50  
51  
52  
53  
54

1  
2  
3 Ababa-Djibouti route), Kombolcha (Addis Ababa-Mekelle route), Metema (Addis Ababa-  
4 Metema route) and Shashemene (Addis Ababa -Moyale route).  
5  
6  
7

8 The source populations were all female sex workers living in those selected eleven towns. For  
9 the purpose of the study, female sex workers were defined as follows: ‘women who practice  
10 sexual activity with the pre-conditions of financial or in-kind benefits’. The inclusion criteria  
11 were: receiving money or other benefits for sex with four or more people within the last 30 days,  
12 being 15 and above years old, properly recruited by a peer (present with the coupon) and giving  
13 consent both for the interview and blood drawing.  
14  
15  
16  
17  
18

### 19 **Sample size**

20  
21 The source study protocol calculated sample size of 400 female sex workers in each town using  
22 anticipated HIV prevalence of 25%, 6% precision, 95% CI and design effect of two. However,  
23 the number of female sex workers who participated in each town was not exactly 400, and the  
24 total number of FSWs who participated in the study was 4900.  
25  
26  
27  
28

### 29 **Data collection procedure**

30  
31 Six seed FSWs were selected to initiate coupon-based recruitment. Eligible FSWs who provided  
32 informed consent to participate were administered a face to face interview in a private room by a  
33 nurse with a structured questionnaire in Amharic language. They then provided blood specimens  
34 for HIV, CD4 and viral load testing in a private room. When the process was completed,  
35 participants were provided with up to three coupons and instructed to recruit their FSW peers  
36 into the study. To compensate the time and costs of transport, a primary incentive of 100 ETB  
37 (\$5.0) and additional 50 ETB (\$2.5) for each eligible peer she enrolled into the study was given.  
38 An electronic data base for tracking coupons and recruitment was established with participant  
39 ID, fingerprint code, and a pre-printed label that was scanned. The data collection tools and  
40 questionnaire were pretested in a pilot study; feedbacks from the pilot study was used to finalize  
41 the data collection tools and field logistic and operational procedures. The questionnaire  
42 included: socio-demographic characteristics, sexual risk exposure, sexual behaviors, condom  
43 use, history of STI symptoms, alcohol and drug use consumption, violence related issues,  
44 knowledge of HIV transmission, and HIV testing history.  
45  
46  
47  
48  
49  
50  
51  
52  
53  
54

## Variables

Violence was assessed with two dependent variables, which were physical beating during the last one year and rape since sex selling started. The following questions were asked: “When exchanging sex for money during the last one year, have you ever been physically beaten by a sexual partner or client?” and “Have you ever been raped or forced to have sex against your will since you start selling sex?” responses were dichotomized into a Yes and No variable for analysis. For both of the questions, all who had reported beating and rape at least once were considered as exposed to violence (Yes).

The independent measures included current age, monthly income from selling sex, marital status, educational status, sex selling venue, khat chewing, alcohol drinking, HIV status, and condom breakage.

Current age was a continuous variable and for the purpose of analysis was categorized as ten year intervals: younger (15-24), middle age (25-34), and older one (35+), with the younger age group used as the reference category. Monthly income from selling sex was an open-ended question and for the analysis was categorized in to 1000Birr (\$50) intervals considering the cost of living in the country. Educational status was categorized as no formal education, primary first cycle (grade 1-4), primary second cycle (grade 5-8), and secondary and above for analysis, in accordance with the country education system.

In addition, sex workers were categorized based on their sex selling venue, where bar/hotel was used as the reference because it is the most common FSW working venue. In addition, this venue category has better security than the other venues and the numbers of FSWs in this category were higher than the rest.

Alcohol consumption was measured through different approaches including frequency of alcohol consumption, number of drinks per specific day and frequency of heavy episodic drinking (6 or more standard drinks per day).

Khat chewing was assessed with the frequency of days they chewed in a week. Khat (*Catha edulis*) is a stimulant leave, and after chewing an individual may become talkative, alert, feel excitement, increased self-esteem, and increased imagination (31). Khat chewing is also popular

1  
2  
3 among FSWs, as it is a means to spend the day time, to be active during the night for sex work  
4 and to socialize with each other.  
5

### 6 7 **Data analysis**

8  
9 Statistical analysis was performed using SPSS Version 20. Descriptive statistics were used to  
10 provide summary measures (means, frequencies). Odds ratios (crude and adjusted) and 95%  
11 confidence intervals (CI) were obtained using bivariate and multivariate logistic regression  
12 analysis. Those independent variables significantly associated with the outcome variable in the  
13 bivariate analysis were included in the multivariate analysis. Cases with missing data were  
14 excluded from the analyses. Significance was accepted at p-value <0.05.  
15  
16  
17  
18  
19

### 20 21 **Ethical considerations**

22  
23 Permission for data use was obtained from the Ethiopian Public Health Institute (EPHI). The  
24 protocol was cleared at the Scientific and Ethical Research Office (SERO) of EPHI, the  
25 Ethiopian Science and Technology Ministry Ethical Committee, and CDC-Atlanta IRB.  
26 Individual written informed consent was obtained from each participant for the interview and  
27 blood sample collection while the study was conducted.  
28  
29  
30

### 31 32 **Patient and Public Involvement**

33  
34 No patients were involved in the development of research question, the outcome measures, the  
35 design or implementation of the study. Nevertheless, Due to the nature of respondent driven  
36 sampling technique, an assessment was conducted to identify seeds and hotspot areas for the  
37 actual data collection. These assessment was conducted in collaboration with organizations  
38 working with FSWs and with active member of FSWs in the towns. The primary result is  
39 planned to disseminate by publication in a peer-reviewed journals and to present the study at  
40 national level for stakeholders working with FSWs.  
41  
42  
43  
44  
45

## 46 47 **Results**

### 48 49 **Socio-demographic and other background characteristics**

50  
51 A total of 4900 female sex workers participated in the study. Demographic, socioeconomic and  
52 other background characteristics of the participants are shown in Table 1. The majority of the  
53 participants were between 15 to 24 years old with a mean age of 24 years (SD= 5.7); 44 % of  
54  
55

1  
2  
3 them were divorced, separated or widowed. A quarter of them reported being uneducated and  
4  
5 40% of them earned on average less than \$50 per month. Regarding sex selling starting age, the  
6  
7 majority started selling sex between the ages of 18-24 years, although nearly 25% started before  
8  
9 the age of 18. FSWs worked in different eating, drinking and recreation establishments and also  
10  
11 other venues; 33% recruited their clients in bars/hotels, followed by 26.5% on the street and 20%  
12  
13 in local drinking houses (Table 1).  
14

15 **Table 1. Distribution of socio-demographic and other background characteristics among**  
16 **4900 female sex workers across eleven towns, Ethiopia**  
17

| 18 Variable                               | 19 Frequency | 20 Percentage |
|-------------------------------------------|--------------|---------------|
| 21 <b>Age</b>                             |              |               |
| 22 15-24                                  | 2831         | 57.8          |
| 23 25-34                                  | 1700         | 34.7          |
| 24 35+                                    | 369          | 7.5           |
| 25 Total                                  | 4900         | 100.0         |
| 26 Missing                                | 0            |               |
| 27 <b>Mean age of respondents = 24.16</b> |              |               |
| 28 <b>SD= 5.7</b>                         |              |               |
| 29 <b>Educational status</b>              |              |               |
| 30 No Education                           | 1224         | 25.0          |
| 31 Primary 1st cycle (1-4)                | 764          | 16.0          |
| 32 Primary 2nd cycle (5-8)                | 2062         | 42.0          |
| 33 Secondary & above                      | 831          | 17.0          |
| 34 Total                                  | 4881         | 100.0         |
| 35 Missing                                | 19           |               |
| 36 <b>Sex selling venues</b>              |              |               |
| 37 Bar/Hotel                              | 1613         | 33.0          |
| 38 Local drinking houses                  | 983          | 20.1          |
| 39 Spa/Massage/Beauty salon/Own house     | 261          | 5.3           |
| 40 Red Light houses                       | 429          | 8.8           |
| 41 Street                                 | 1295         | 26.5          |
| 42 Others                                 | 304          | 6.2           |
| 43 Total                                  | 4885         | 100.0         |
| 44 Missing                                | 15           |               |
| 45 <b>Current marital status</b>          |              |               |
| 46 Never Married                          | 2698         | 55.2          |
| 47 Married/Cohabited                      | 37           | 0.8           |

1  
2  
3  
4  
5  
6  
7  
8  
9  
10  
11  
12  
13  
14  
15  
16  
17  
18  
19  
20  
21  
22  
23  
24  
25  
26  
27  
28  
29  
30  
31  
32  
33  
34  
35  
36  
37  
38  
39  
40  
41  
42  
43  
44  
45  
46  
47  
48  
49  
50  
51  
52  
53  
54  
55  
56  
57  
58  
59  
60

|                                        |      |       |
|----------------------------------------|------|-------|
| Separated/Divorced                     | 1976 | 40.5  |
| Widowed                                | 173  | 3.5   |
| Total                                  | 4884 | 100.0 |
| Missing                                | 16   |       |
| <b>Sex selling starting age</b>        |      |       |
| Less than 15                           | 120  | 2.5   |
| 15 - 17                                | 1088 | 22.3  |
| 18 - 24                                | 2864 | 58.7  |
| 25 - 29                                | 583  | 12.0  |
| 30 & Above                             | 220  | 4.5   |
| Total                                  | 4875 | 100.0 |
| Missing                                | 25   |       |
| <b>Monthly income from selling sex</b> |      |       |
| Less than 1000 (<\$50)                 | 1932 | 39.6  |
| 1001 – 2000 (\$50-\$100)               | 1554 | 31.8  |
| 2001 – 3000 (\$100-\$150)              | 812  | 16.6  |
| 3001 – 4000 (\$150-\$200)              | 318  | 6.5   |
| 4001 – 5000 (\$200-\$250)              | 150  | 3.1   |
| Above 5000 (>\$250)                    | 117  | 2.4   |
| Total                                  | 4883 | 100.0 |
| Missing                                | 17   |       |

---

### Behavioral and other related factors

Table 2 shows the prevalence of behavioral and other factors. The majority (70%) of the respondents consumed alcohol and of those, 15.8% had drunk so much on a typical day within the past 30 days that they did not remember what happened the next day. About half of the respondents chewed khat and 23.8% of them chewed almost every day (5-7 days a week).

Regarding condom use, 25.5% of them reported condom breakage within the past 30 days prior to the study. HIV/AIDS status of the respondents was also assessed and a quarter of them (23%) were HIV positive. With regard to physical and sexual violence experience, 17.5% of them reported physical beating within the past 12 months and 15.2% reported having been raped since they started selling sex. (Table 2)



**Table 2. Behavioral and other related factors among 4900 female sex workers across eleven towns, Ethiopia**

| Variable                                                           | Frequency | Percentage |
|--------------------------------------------------------------------|-----------|------------|
| <b>Frequency alcohol consumption</b>                               |           |            |
| Never                                                              | 1493      | 30.6       |
| Once a month or less                                               | 222       | 4.5        |
| 2 - 4 days a month                                                 | 492       | 10.1       |
| 2 - 3 days a week                                                  | 1394      | 28.5       |
| 4 or more days a week                                              | 1283      | 26.3       |
| Total                                                              | 4884      | 100.0      |
| Missing                                                            | 16        |            |
| <b>Alcohol containing drinks on a typical day</b>                  |           |            |
| 1 or 2                                                             | 806       | 23.8       |
| 3 or 4                                                             | 1383      | 40.8       |
| 5 or 6                                                             | 742       | 21.9       |
| 7 to 9                                                             | 296       | 8.7        |
| 10 or more                                                         | 164       | 4.8        |
| Total                                                              | 3391      | 100.0      |
| Missing                                                            | 0         |            |
| <b>Frequency of heavy episodic drinking</b>                        |           |            |
| Never                                                              | 1863      | 54.9       |
| Less than monthly                                                  | 236       | 7.0        |
| Monthly                                                            | 299       | 8.8        |
| Weekly                                                             | 630       | 18.6       |
| Daily or almost daily                                              | 363       | 10.7       |
| Total                                                              | 3391      | 100.0      |
| Missing                                                            | 0         |            |
| <b>Drunk so much and can't remember what happened the next day</b> |           |            |
| Yes, in last 30 days                                               | 534       | 15.8       |
| Yes, not in last 30 days                                           | 233       | 6.9        |
| No                                                                 | 2609      | 77.2       |
| Don't remember                                                     | 4         | 0.1        |
| Total                                                              | 3380      | 100.0      |
| Missing                                                            | 11        |            |
| <b>Frequency of khat chewing</b>                                   |           |            |
| Never                                                              | 2431      | 49.8       |
| Less than once a week                                              | 577       | 11.8       |
| 1-2 days per week                                                  | 429       | 8.8        |
| 3-4 days per week                                                  | 284       | 5.8        |
| 5-7 days per week                                                  | 1162      | 23.8       |
| Total                                                              | 4883      | 100.0      |
| Missing                                                            | 17        |            |
| <b>Condom breakage in the past 30 days</b>                         |           |            |
| Yes                                                                | 1243      | 25.5       |
| No                                                                 | 3635      | 74.5       |

1  
2  
3  
4  
5  
6  
7  
8  
9  
10  
11  
12  
13  
14  
15  
16  
17  
18  
19  
20  
21  
22  
23  
24  
25  
26  
27  
28  
29  
30  
31  
32  
33  
34  
35  
36  
37  
38  
39  
40  
41  
42  
43  
44  
45  
46  
47  
48  
49  
50  
51  
52  
53  
54  
55  
56  
57  
58  
59  
60

|                                                                      |      |       |
|----------------------------------------------------------------------|------|-------|
| Total                                                                | 4878 |       |
| Missing                                                              | 22   |       |
| <b>HIV status</b>                                                    |      |       |
| Negative                                                             | 3708 | 76.0  |
| Positive                                                             | 1173 | 24.0  |
| Total                                                                | 4881 | 100.0 |
| Missing                                                              | 19   |       |
| <b>Ever been raped or forced to have sex since start selling sex</b> |      |       |
| No                                                                   | 4142 | 84.8  |
| Yes                                                                  | 742  | 15.2  |
| Total                                                                | 4884 | 100.0 |
| Missing                                                              | 16   |       |
| <b>Physically beaten in the last 12 months</b>                       |      |       |
| No                                                                   | 4026 | 82.5  |
| Yes                                                                  | 855  | 17.5  |
| Total                                                                | 4881 | 100.0 |
| Missing                                                              | 19   |       |

### Bivariate regression analysis outcome

Table 3 shows the bivariate logistic regression results; each independent variable was analyzed separately against the two outcome variables. The variables that were significantly associated with physical violence were: age, educational level, monthly income, current marital status, sex selling venues, frequency of alcohol consumption, alcohol containing drinks on a typical day, frequency of heavy episodic drinking, frequency of khat chewing in a week and condom breakage. Variables significantly associated with rape were: educational level, income from selling sex, frequency of alcohol consumption, alcohol containing drinks on a typical day, frequency of heavy episodic drinking, frequency of khat chewing in a week and condom breakage. HIV status was not significantly associated with either physical violence or rape.

**Table 3. Bivariate logistic regression analyses results of independent variables associated with physically beaten in the last 12 months and ever been raped since start selling sex, odds ratio (OR) and 95% confidence intervals (CI)**

| Variables  | Physical beating<br>OR (95% CI) | Rape<br>OR (95% CI) |
|------------|---------------------------------|---------------------|
| <b>Age</b> |                                 |                     |
| 15-24*     |                                 |                     |
| 25-34      | 1.02 (0.87, 1.19)               | 1.02 (0.86, 1.21)   |
| 35+        | 0.52 (0.37, 0.74)               | 0.88 (0.64, 1.20)   |

**Educational level**

No Education\*

Primary 1st cycle (1-4) 1.01 (0.79, 1.31) 1.45 (1.14,1.85)

Primary 2nd cycle (5-8) 1.35 (1.11, 1.63) 1.08 (0.88,1.32)

Secondary &amp; above 1.49 (1.18, 1.87) 1.09 (0.85,1.41)

**Monthly income from selling sex**

Less than 1000 birr (&lt;\$50) \*

1001 – 2000 birr (\$50-\$100) 1.44 (1.20, 1.73) 0.69 (0.58, 0.85)

2001 – 3000 birr (\$100-\$150) 1.67 (1.35, 2.07) 0.51 (0.39, 0.66)

3001 – 4000 birr (\$150-\$200) 1.61 (1.19, 2.17) 0.65 (0.46, 0.92)

4001 – 5000 birr (\$200-\$250) 2.12 (1.44, 3.14) 1.01 (0.66, 1.55)

Above 5000 birr (&gt;\$250) 1.62 (1.01, 2.58) 0.75 (0.44, 1.27)

**Current marital status**

Never Married\*

Married/Cohabited 1.05 (0.46, 2.41) 0.69 (0.24, 1.96)

Separated/Divorced 0.93 (0.80, 1.09) 1.03 (0.88, 1.21)

Widowed 0.59 (0.37, 0.95) 1.39 (0.95, 2.06)

**Sex selling venues**

Bar/Hotel\*

Local drinking houses 0.87 (0.69, 1.09) -

Spa/Massage/Beauty salon/Own house 0.45 (0.28, 0.71) -

Red Light houses 0.95 (0.71, 1.27) -

Street 1.51 (1.26, 1.82) -

Others 1.37 (1.01, 1.86) -

**Frequency alcohol consumption**

Never\*

2 - 4 days a month 1.82 (1.35, 2.44) 1.74 (1.27, 2.38)

2 - 3 days a week 2.07 (1.66, 2.57) 1.87 (1.48, 2.36)

4 or more days a week 3.54 (2.87, 4.37) 3.43 (2.75, 4.28)

**Alcohol containing drinks on a typical day**

1 or 2\*

3 or 4 1.39 (1.09, 1.76) 1.16 (0.92, 1.46)

5 or 6 2.03 (1.58, 2.62) 1.09 (0.84, 1.43)

7 to 9 2.19 (1.59, 3.03) 0.98 (0.68, 1.41)

10 or more 2.76 (1.88, 4.03) 1.78 (1.20, 2.65)

**Frequency of heavy episodic drinking**

Never\*

Less than monthly 1.43 (1.03, 1.98) 1.39 (0.99, 1.95)

Monthly 1.23 (0.90, 1.66) 1.59 (1.18, 2.13)

1  
2  
3  
4  
5  
6  
7  
8  
9  
10  
11  
12  
13  
14  
15  
16  
17  
18  
19  
20  
21  
22  
23  
24  
25  
26  
27  
28  
29  
30  
31  
32  
33  
34  
35  
36  
37  
38  
39  
40  
41  
42  
43  
44  
45  
46  
47  
48  
49  
50  
51  
52  
53  
54  
55  
56  
57  
58  
59  
60

|                                                                    |                   |                   |
|--------------------------------------------------------------------|-------------------|-------------------|
| Weekly                                                             | 1.73 (1.39, 2.14) | 1.03 (0.80, 1.31) |
| Daily or almost daily                                              | 1.97 (1.53, 2.55) | 1.69 (1.29, 2.21) |
| <b>Drunk so much and can't remember what happened the next day</b> |                   |                   |
| No*                                                                |                   |                   |
| Yes, in the last 30 days                                           | 2.90 (2.37, 3.56) | 1.66 (1.33, 2.07) |
| Yes, before last 30 days                                           | 2.22 (1.65, 2.99) | 1.27 (0.91, 1.78) |
| <b>Frequency of khat chewing in a week</b>                         |                   |                   |
| Never*                                                             |                   |                   |
| Less than once a week                                              | 1.24 (0.96, 1.60) | 0.89 (0.67, 1.19) |
| 1-2 days per week                                                  | 1.67 (1.28, 2.18) | 2.89 (2.26, 3.69) |
| 3-4 days per week                                                  | 2.49 (1.87, 3.34) | 2.92 (2.19, 3.89) |
| 5-7 days per week                                                  | 2.48 (2.08, 2.96) | 1.47 (1.21, 1.79) |
| <b>Condom breakage</b>                                             |                   |                   |
| No*                                                                |                   |                   |
| Yes                                                                | 1.99 (1.69, 2.33) | 1.62 (1.37, 1.92) |
| <b>HIV test result</b>                                             |                   |                   |
| Negative*                                                          |                   |                   |
| Positive                                                           | 1.04 (0.88, 1.24) | 0.88 (0.73, 1.07) |

Note: \* Reference category

### Multivariate analysis of factors associated with physical violence (physically beaten)

Table 4 shows the results of the multivariate analysis used to identify factors associated with physical violence after simultaneously adjusting for all measures included in the analyses. Female sex workers aged 35 years or above (AOR 0.59, 95% CI 0.38, 0.92) were significantly less experienced to physical violence when compared with the younger age group (15-24 years). FSWs who attend primary 1st cycle education (AOR 0.71, 95% CI 0.52, 0.97) were also less likely to experience physical beating than those who report no education. On the other hand, FSWs who worked on the street (AOR 1.92, 95% CI 1.53, 2.39), in red-light houses (AOR 1.63, 95% CI 1.12, 2.38) and in local drinking houses (AOR 1.35, 95% CI 1.02, 1.78) have an increased odd of experience to physical violence compared with FSWs who worked in bars/hotels. Moreover, substance use was significantly related to physical violence. FSWs who consumed alcohol four or more days in a week (AOR 1.92, 95% CI 1.21, 3.04), those who did not remember what happened the next day due to heavy alcohol consumption both in the past 30 days (AOR 1.98, 95% CI 1.58, 2.49), and before past 30 days (AOR 1.85, 95% CI 1.35, 2.53),

FSWs who chewed khat 3-4 days per week (AOR 1.58, 95% CI 1.13, 2.21) and 5-7 days per week (AOR 1.43, 95% CI 1.13, 1.80) have more likelihood of experiencing physical violence. Condom breakage experience within the past 30 days prior to the study was also significantly associated with physical violence (AOR 1.51, 95% CI 1.25, 1.84).

**Table 4. Multivariate logistic regression analysis of factors associated with physical violence (physically beaten) in the past twelve month among female sex workers across eleven towns in Ethiopia, odds ratios (OR) and 95% confidence intervals (CI).**

| Variables                              | OR (95% CI)       |
|----------------------------------------|-------------------|
| <b>Age</b>                             |                   |
| 15-24*                                 |                   |
| 25-34                                  | 1.04 (0.82, 1.22) |
| 35+                                    | 0.59 (0.38, 0.92) |
| <b>Educational level</b>               |                   |
| No Education*                          |                   |
| Primary 1st cycle (1-4)                | 0.71 (0.52, 0.97) |
| Primary 2nd cycle (5-8)                | 0.98 (0.77, 1.26) |
| Secondary & above                      | 1.14 (0.85, 1.53) |
| <b>Monthly income from selling sex</b> |                   |
| Less than 1000 birr (<\$50) *          |                   |
| 1001 – 2000 birr (\$50-\$100)          | 1.13 (0.90, 1.41) |
| 2001 – 3000 birr (\$100-\$150)         | 1.14 (0.87, 1.48) |
| 3001 – 4000 birr (\$150-\$200)         | 1.12 (0.77, 1.61) |
| 4001 – 5000 birr (\$200-\$250)         | 1.44 (0.93, 2.24) |
| Above 5000 birr (>\$250)               | 1.12 (0.63, 1.99) |
| <b>Current marital status</b>          |                   |
| Never Married*                         |                   |
| Married/Cohabited                      | 0.68 (0.24, 1.89) |
| Separated/Divorced                     | 1.08 (0.88, 1.29) |
| Widowed                                | 0.87 (0.48, 1.59) |
| <b>Sex selling venues</b>              |                   |
| Bar/Hotel*                             |                   |
| Local drinking houses                  | 1.35 (1.02, 1.78) |
| Spa/massage/beauty salon/own house     | 1.04 (0.58, 1.84) |
| Red Light houses                       | 1.63 (1.12, 2.38) |
| Street                                 | 1.92 (1.53, 2.39) |
| Others                                 | 1.39 (0.98, 1.99) |
| <b>Frequency alcohol consumption</b>   |                   |

|                       |                   |
|-----------------------|-------------------|
| Never*                |                   |
| 2 - 4 days a month    | 1.25 (0.77, 2.04) |
| 2 - 3 days a week     | 1.32 (0.84, 2.06) |
| 4 or more days a week | 1.92 (1.21, 3.04) |

#### Alcohol containing drinks on a typical day

|            |                   |
|------------|-------------------|
| 1 or 2*    |                   |
| 3 or 4     | 1.08 (0.84, 1.39) |
| 5 or 6     | 1.15 (0.85, 1.57) |
| 7 to 9     | 1.09 (0.74, 1.64) |
| 10 or more | 1.14 (0.72, 1.81) |

#### Frequency of heavy episodic drinking

|                       |                   |
|-----------------------|-------------------|
| Never*                |                   |
| Less than monthly     | 1.07 (0.75, 1.52) |
| Monthly               | 0.84 (0.59, 1.18) |
| Weekly                | 1.07 (0.82, 1.39) |
| Daily or almost daily | 0.99 (0.71, 1.38) |

#### Drunk so much and can't remember what happened the next day

|                          |                   |
|--------------------------|-------------------|
| No*                      |                   |
| Yes, in the last 30 days | 1.98 (1.58, 2.49) |
| Yes, before last 30 days | 1.85 (1.35, 2.53) |

#### Frequency of khat chewing in a week

|                       |                   |
|-----------------------|-------------------|
| Never*                |                   |
| Less than once a week | 1.04 (0.77, 1.42) |
| 1-2 days per week     | 1.30 (0.96, 1.77) |
| 3-4 days per week     | 1.58 (1.13, 2.21) |
| 5-7 days per week     | 1.43 (1.13, 1.80) |

#### Condom breakage

|     |                   |
|-----|-------------------|
| No* |                   |
| Yes | 1.51 (1.25, 1.84) |

---

Note: \* Reference category

#### Multivariate analysis of factors associated with sexual violence (rape)

Table 5 shows the results of the multivariate logistic regression analyses to identify factors that were significantly associated with rape after simultaneously adjusting for all measures included in the analyses. Female sex workers with a monthly income of \$50 to \$200 have significantly less experience of rape compared to those with a monthly income of below \$50. Drinking alcohol four or more days per week (AOR 2.33, 95% CI 1.47, 3.7), those with experience of heavy drinking in the last 30 days and did not remember what happened the next day (AOR 1.34,

95% CI 1.05, 1.72), experience of heavy episodic drinking (HED) in a month (AOR 1.71, 95% CI 1.24, 2.38), experience of HED almost daily (AOR 1.49, 95% CI 1.06, 2.11) and chewing khat 1-2 days (AOR 2.13, 95% CI 1.61, 2.83) and 3-4 days (AOR 2.15, 95% CI 1.55, 2.98) per week were positively associated with rape. Moreover, condom breakage (AOR 1.26, 95% CI 1.03, 1.55) was significantly more frequent among FSWs who reported rape.

**Table 5. Multivariate logistic regression analysis of factors associated with sexual violence (rape) since sex selling start among female sex workers across eleven towns in Ethiopia, odds ratios (OR) and 95% confidence intervals (CI).**

| Variables                                                          | OR (95% CI)       |
|--------------------------------------------------------------------|-------------------|
| <b>Monthly income from selling sex</b>                             |                   |
| Less than 1000 birr (<\$50) *                                      |                   |
| 1001 – 2000 birr (\$50-\$100)                                      | 0.62 (0.49, 0.77) |
| 2001 – 3000 birr (\$100-\$150)                                     | 0.42 (0.32, 0.57) |
| 3001 – 4000 birr (\$150-\$200)                                     | 0.45 (0.29, 0.69) |
| 4001 – 5000 birr (\$200-\$250)                                     | 0.84 (0.53, 1.33) |
| Above 5000 birr (>\$250)                                           | 0.62 (0.34, 1.15) |
| <b>Current marital status</b>                                      |                   |
| Never Married*                                                     |                   |
| Married/Cohabited                                                  | 0.57 (0.17, 1.97) |
| Separated/Divorced                                                 | 1.01 (0.83, 1.22) |
| Widowed                                                            | 1.61 (0.98, 2.63) |
| <b>Educational level</b>                                           |                   |
| No Education*                                                      |                   |
| Primary 1st cycle (1-4)                                            | 1.06 (0.79, 1.43) |
| Primary 2nd cycle (5-8)                                            | 0.83 (0.65, 1.07) |
| Secondary & above                                                  | 0.92 (0.68, 1.25) |
| <b>Frequency of alcohol consumption</b>                            |                   |
| Never*                                                             |                   |
| 2 - 4 days a month                                                 | 1.15(0.69, 1.89)  |
| 2 - 3 days a week                                                  | 1.24(0.78, 1.96)  |
| 4 or more days a week                                              | 2.33(1.47,3.73)   |
| <b>Drunk so much and can't remember what happened the next day</b> |                   |
| No*                                                                |                   |
| Yes, in the last 30 days                                           | 1.34 (1.05, 1.72) |
| Yes, before last 30 days                                           | 1.07 (0.75, 1.52) |
| <b>Frequency of heavy episodic drinking</b>                        |                   |
| Never*                                                             |                   |

|                       |                   |
|-----------------------|-------------------|
| Less than monthly     | 1.61 (1.12, 2.32) |
| Monthly               | 1.71 (1.24, 2.38) |
| Weekly                | 1.04 (0.78, 1.38) |
| Daily or almost daily | 1.49 (1.06, 2.11) |

#### Frequency of khat chewing in a week

|                       |                   |
|-----------------------|-------------------|
| Never*                |                   |
| less than once a week | 0.83 (0.59, 1.16) |
| 1-2 days per week     | 2.13 (1.61, 2.83) |
| 3-4 days per week     | 2.15 (1.55, 2.98) |
| 5-7 days per week     | 1.06 (0.83, 1.36) |

#### Condom breakage

|     |                   |
|-----|-------------------|
| No* |                   |
| Yes | 1.26 (1.03, 1.55) |

Note: \* Reference category

## Discussion

According to this study, 17.5% of FSWs in Ethiopia had been physically beaten within the past 12 months and 15.2% had been raped since they start selling sex. Age, sex selling venues, and high consumption of alcohol and khat were significant predictors of physical violence (beating). On the other hand, the significant predictors of sexual violence (rape) were low income and also high consumption of alcohol and khat.

The prevalence of both physical violence and sexual violence (rape) was lower than prevalence found in studies conducted in Uganda, Ivory Coast, and Kenya (9, 12, 30, 32). However, when compared to the studies conducted in Adama (Ethiopia), China, India, and Mexico the current study reported a higher prevalence of both physical and sexual violence (10, 11, 13, 14, 33). The difference in the definition of violence used might be one of the possible explanations for the difference between the current results and those found in other studies in Africa. Most of the studies assessed all forms of physical and sexual violence while the current study assessed solely physical beating and forced penetrative sex (rape). On the other hand, differences in results across settings might also be due to differences in background and contextual factors such as socio-economic status and cultural aspects.



1  
2  
3 Several studies showed that younger FSWs are more exposed to physical and sexual violence  
4 (13, 34) in line with the current findings that younger FSWs (15-24 years) were at higher risk for  
5 physical violence when compared to their older counter parts (35+ years). The lack of experience  
6 in identifying perpetrators and the perpetrator approach towards young FSWs may play a role in  
7 increased exposure to violence. This finding is significant because younger FSWs entering the  
8 sex trade is increasing. Therefore to reduce the vulnerability of younger FSWs; targeted harm  
9 reduction program including awareness creation on how they could be exposed to violence and  
10 factors which increases the likelihood of violence should be introduced to the interventions  
11 program.  
12  
13  
14  
15  
16  
17  
18

19  
20 Even though sex work is not a legally recognized profession in Ethiopia, most of the  
21 establishments where the sex workers are based (hotels, bars/restaurants, night clubs etc.) operate  
22 legally with working licenses. Nevertheless, some FSWs work on the street and in red-light  
23 houses where they manage their own working area. Consequently, the levels of experience to  
24 physical violence vary according to their working area. The present study revealed that FSWs  
25 who mainly work in bar and hotels face less physical beating when compared with FSWs who  
26 work on the street, in red-light houses and local drinking houses. This finding is in line with the  
27 studies conducted in New York City and England (20, 21). This might be due to the level of  
28 protection in their working areas and/or due to the type of clients who frequents those localities.  
29 This signifies that engaging bar/hotel managers in the prevention activity could be additional  
30 strategy to increase the effectiveness of harm reduction programs.  
31  
32  
33  
34  
35  
36  
37  
38  
39

40 Furthermore, an association between alcohol use and higher frequency of physical violence and  
41 rape was reported. In particular, FSWs who consume alcohol more than four days a week and  
42 those with experience of HED significantly experienced violence. Several studies conducted in  
43 Ethiopia, Uganda, and Kenya also reported similar findings (9, 10, 12, 19). A large proportion of  
44 female sex workers (FSWs) and their clients use alcohol prior to or during sex to helps them to  
45 solicit clients and overcome their shyness (35, 36). In particular high level of alcohol  
46 consumption places FSWs in disadvantaged situations by intensifying their vulnerability (8).  
47 Research reviews also report that alcohol use impairs FSWs' ability to detect the risk of violence  
48 and increases their vulnerability to risk-prone situations (37, 38). The consequences HED is not  
49  
50  
51  
52  
53  
54  
55

1  
2  
3 just limited to physical effects of intoxication but further exposes them to violence and risky  
4 sexual behaviors.  
5  
6

7  
8 Correspondingly, chewing khat more days in a week was significantly associated  
9 with experience of physical violence and rape. After chewing khat, some of the users consume  
10 alcohol-containing drinks to decrease the level of stimulation. Although there is no study on the  
11 relationship between khat chewing and experience to violence among FSWs, most FSWs chew  
12 khat before departing to work and drink alcohol during working hours to minimize the effect,  
13 which in turn exposes them to HED and violence. Even though the correlation of alcohol and  
14 khat on the current study is low; Some says drinking alcohol after chewing khat will reduce the  
15 stimulant effect. Further studies should assess the contribution of Khat chewing to increasing  
16 violence experience independently.  
17  
18  
19  
20  
21  
22  
23

24  
25 In addition, the resistance to condom use from clients and the violence experience may create a  
26 difficult situation for FSWs with regard to proper use of condoms, which further exposes FSWs  
27 to HIV and other STIs. In this study there were a significant relationship between condom  
28 breakage and history of physical beating and rape. Even though there was no significant  
29 association between HIV and violence, the proportion of HIV positive FSWs in the sample was  
30 high (23%). A study conducted in Benin reported a similar finding concerning the association  
31 between condom breakage and violence, but unlike our study there was a significant association  
32 between HIV and violence experience (23). This finding signifies that providing condom only  
33 will not be effective to prevent HIV and other STIs transmission; rather working on factors  
34 contributing for not utilizing condom properly (like violence) could play an important role on  
35 HIV prevention programs.  
36  
37  
38  
39  
40  
41  
42  
43

44  
45 In general, there were some similarities but also differences concerning the predictors of rape  
46 and physical violence. For example, being in the younger age group was a significant predictor  
47 of physical beating but not for rape, and having lower income was associated with experience to  
48 rape but not to physical beating. Nevertheless, based on the current data, it is difficult to draw  
49 any conclusions about why one variable would matter for physical beating but not for rape. The  
50  
51  
52  
53  
54  
55  
56  
57  
58  
59  
60

1  
2  
3 reasons underlying the differences are currently unknown, and further research might be required  
4 to gain an understanding of the patterns observed.  
5  
6

### 7 **Methodological considerations**

8  
9  
10 There are a limited number of studies on violence among FSWs in Ethiopia and the existing  
11 studies are restricted to one city (9, 10). One of the strengths of this study is that it involves  
12 multiple sites (eleven large towns) across the country. The second strength is the sampling  
13 technique; the study used a respondent-driven sampling technique which is recommended for  
14 hard to reach populations and is believed to give a representative sample of the target population.  
15 The third strength is the assessment of their HIV status on site using the national testing  
16 algorithm. In addition, the pilot study conducted prior to the actual implementation added  
17 strength for the main study protocol.  
18  
19  
20  
21  
22  
23  
24

25 This study also had limitations. First, sexual and physical violence are sensitive topics that are  
26 subject to underreporting because of social desirability bias. Second, recall bias could occur  
27 because participants were asked about physical violence in the past year and rape since they start  
28 selling sex. We tried to minimize underreporting through intense interviewer training. In  
29 addition, since it is a cross-sectional study, participants are assessed only once; thus, it would be  
30 difficult to infer the temporal association between a risk factor and an outcome. In addition, the  
31 results regarding correlates of physical and sexual violence among FSWs in Ethiopia might have  
32 limited generalizability across settings. However, these results are likely to be relevant for other  
33 FSWs in other African countries that have a similar setting as Ethiopia, and may inform targeted  
34 prevention strategies for this key population.  
35  
36  
37  
38  
39  
40  
41  
42  
43

### 44 **Conclusion**

45  
46 In general, FSWs are vulnerable to physical and sexual violence, and the risk increases when  
47 they are younger, street-based, and are high consumers of alcohol or khat. Therefore, to reduce  
48 physical and sexual violence, strategies to secure and improve their work environment should be  
49 a critical component of targeted interventions. Increasing awareness regarding the role of khat  
50 chewing and alcohol drinking towards vulnerability to violence should be an integral component  
51  
52  
53  
54

of HIV prevention and violence reduction programs. In addition, targeted efforts should be made for the younger FSWs to reduce their vulnerability.

## Acknowledgments

We would like to express gratitude to the study participants and the data collectors.

**Conflict of Interest:** None to declare.

## Authors contributions

MA and AA developed the study design. MA analyzed and interpreted the data and drafted the manuscript. AA was involved in the data analysis and interpretation, and in the writing of the manuscript. TT was involved in the interpretation of the data and contributed to the writing of the manuscript. All authors approved the final manuscript.

**Funding:** This research received no specific grant from any funding agency.

**Data sharing statement:** No additional data available.

## Reference

1. Jewkes R. Intimate partner violence: causes and prevention. *The Lancet*. 2002; 359 (9315): 1423-9.
2. World Health Organization, Global and regional estimates of violence against women: prevalence and health effects of intimate partner violence and non-partner sexual violence: executive summary.  
[https://apps.who.int/iris/bitstream/handle/10665/85239/9789241564625\\_eng.pdf;jsessionid=6E940F74EB1BC5204EEDE0FC6D26F358?sequence=1](https://apps.who.int/iris/bitstream/handle/10665/85239/9789241564625_eng.pdf;jsessionid=6E940F74EB1BC5204EEDE0FC6D26F358?sequence=1)
3. Glasier A, Gulmezoglu AM, Schmid GP, Moreno CG, Van Look PF. Sexual and reproductive health: a matter of life and death. *The Lancet*. 2006; 368 (9547): 1595-607.
4. Perry A. Risk Factors of Gender-based Sexual Violence. *RTM Insights*. Issue 23 :: May 2012.  
[http://www.rutgerscps.org/uploads/2/7/3/7/27370595/riskfactorsofgender-basedsexual\\_violence\\_rtminsights23.pdf](http://www.rutgerscps.org/uploads/2/7/3/7/27370595/riskfactorsofgender-basedsexual_violence_rtminsights23.pdf)
5. Godwin J. *Sex Work and the Law in Asia and the Pacific*. Bangkok: United Nations Development Programme.  
<http://www.undp.org/content/dam/undp/library/hivaids/English/HIV-2012-SexWorkAndLaw.pdf>
6. The Criminal Code of the Federal Democratic Republic of Ethiopia Article 634: (Proclamation No. 414/2004) 2004.

- 1  
2  
3 7. World Health Organization, Addressing violence against women and achieving the  
4 Millennium Development Goals. 2005.  
5 <https://www.who.int/gender/documents/MDGs&VAWSept05.pdf>
- 6  
7 8. World Health Organization, Addressing Violence against Sex Workers 2013.  
8 [https://www.who.int/hiv/pub/sti/sex\\_worker\\_implementation/swit\\_chpt2.pdf](https://www.who.int/hiv/pub/sti/sex_worker_implementation/swit_chpt2.pdf)
- 9  
10 9. Alemayehu M, Yohannes G, Damte A, Fantahun A, Gebrekirstos K, Tsegay R, et al.  
11 Prevalence and predictors of sexual violence among commercial sex workers in Northern  
12 Ethiopia. *Reproductive Health*. 2015;12(1):47.
- 13  
14 10. Mooney A, Kidanu A, Bradley HM, Kumoji EK, Kennedy CE, Kerrigan D. Work-related  
15 violence and inconsistent condom use with non-paying partners among female sex workers in  
16 Adama City, Ethiopia. *BMC Public Health*. 2013;13(1):771.
- 17  
18 11. Misganaw AC, Worku YA. Assessment of sexual violence among street females in Bahir-Dar  
19 town, North West Ethiopia: a mixed method study. *BMC Public Health*. 2013 Sep 10;13:825.
- 20  
21 12. Schwitters A, Swaminathan M, Serwadda D, Muyonga M, Shiraishi RW, Benech I, et al.  
22 Prevalence of rape and client-initiated gender-based violence among female sex workers:  
23 Kampala, Uganda, 2012. *AIDS and Behavior*. 2015 Feb;19 Suppl 1:S68-76.
- 24  
25 13. Beattie TS, Bhattacharjee P, Ramesh B, Gurnani V, Anthony J, Isac S, et al. Violence against  
26 female sex workers in Karnataka state, south India: impact on health, and reductions in  
27 violence following an intervention program. *BMC Public Health*. Aug 11, 2010, p. 476.
- 28  
29 14. Kelvin EA, Sun X, Mantell JE, Zhou J, Mao J, Peng Y. Vulnerability to sexual violence and  
30 participation in sex work among high-end entertainment centre workers in Hunan Province,  
31 China. *Sexual Health*. 2013 Nov;10(5):391-9.
- 32  
33 15. Wolffers I. Violence repression and other health threats. *Research for Sex Work*. 2001;4:1-2.  
34 <https://www.nswp.org/sites/nswp.org/files/research-for-sex-work-4-english.pdf>
- 35  
36 16. Hanck SE, Blankenship KM, Irwin KS, West BS, Kershaw T. Assessment of self-reported  
37 sexual behavior and condom use among female sex workers in India using a polling box  
38 approach: a preliminary report. *Sexually Transmitted Diseases*. 2008; 35(5):489-94.
- 39  
40 17. Parcesepe AM, Kelly L, Martin SL, Green S, Sinkele W, Suchindran C, et al. The impact of  
41 an alcohol harm reduction intervention on interpersonal violence and engagement in sex work  
42 among female sex workers in Mombasa, Kenya: Results from a randomized controlled trial.  
43 *Drug and Alcohol Dependence*. Jan 2016, 161:21-8.
- 44  
45 18. Wechsberg WM, Luseno WK, Lam WK, Parry CD, Morojele NK. Substance use, sexual risk,  
46 and violence: HIV prevention intervention with sex workers in Pretoria. *AIDS and Behavior*.  
47 2006;10(2):131.
- 48  
49 19. Chersich M, Luchters S, Malonza I, Mwarogo P, King'Ola N, Temmerman M. Heavy  
50 episodic drinking among Kenyan female sex workers is associated with unsafe sex, sexual  
51 violence and sexually transmitted infections. *International Journal of STD & AIDS* 2007. p.  
52 764-9.
- 53  
54  
55  
56  
57  
58  
59  
60

- 1
  - 2
  - 3
  - 4
  - 5
  - 6
  - 7
  - 8
  - 9
  - 10
  - 11
  - 12
  - 13
  - 14
  - 15
  - 16
  - 17
  - 18
  - 19
  - 20
  - 21
  - 22
  - 23
  - 24
  - 25
  - 26
  - 27
  - 28
  - 29
  - 30
  - 31
  - 32
  - 33
  - 34
  - 35
  - 36
  - 37
  - 38
  - 39
  - 40
  - 41
  - 42
  - 43
  - 44
  - 45
  - 46
  - 47
  - 48
  - 49
  - 50
  - 51
  - 52
  - 53
  - 54
  - 55
  - 56
  - 57
  - 58
  - 59
  - 60
20. Church S, Henderson M, Barnard M, Hart G. Violence by clients towards female prostitutes in different work settings: questionnaire survey. *BMJ*. 2001;322(7285):524-5.
21. El-Bassel N, Witte SS, Wada T, Gilbert L, Wallace J. Correlates of partner violence among female street-based sex workers: substance abuse, history of childhood abuse, and HIV risks. *AIDS Patient Care and STDs*. 2001;15(1):41-51.
22. Masvawure TB, Mantell JE, Tocco JU, Gichangi P, Restar A, Chabeda SV, et al. Intentional and unintentional condom breakage and slippage in the sexual interactions of female and male sex workers and clients in Mombasa, Kenya. *AIDS and Behavior*. 2018 Feb;22(2):637-648.
23. Tounkara FK, Diabate S, Guedou FA, Ahoussinou Cm, Kintin Fdr, Zannou DM, et al. Violence, condom breakage and HIV infection among female sex workers in Benin, West Africa. *Sexually Transmitted Diseases*. 2014 May;41(5):312-8.
24. Choi SY, Chen KL, Jiang ZQ. Client-perpetuated violence and condom failure among female sex workers in south western China. *Sexually Transmitted Diseases* 2008.
25. Wilson KS, Deya R, Yuhas K, Simoni J, Vander Stoep A, Shafi J, et al. A prospective cohort study of intimate partner violence and unprotected sex in HIV-positive female sex workers in Mombasa, Kenya. *AIDS and Behavior*. 2016 Sep;20(9):2054-64.
26. Okal J, Chersich MF, Tsui S, Sutherland E, Temmerman M, Luchters S. Sexual and physical violence against female sex workers in Kenya: a qualitative enquiry. *AIDS Care*. 2011 May; 23(5): 612-8.
27. Ethiopian National Key Population HIV Bio-behavioral Surveillance Round I Report. 2013
28. HIV Related Estimates and Projections for Ethiopia-2015
29. Decker MR, Lyons C, Billong SC, Njindam IM, Grosso A, Nunez GT, et al. Gender-based violence against female sex workers in Cameroon: prevalence and associations with sexual HIV risk and access to health services and justice. *Sexually Transmitted Diseases*. 2016 Dec; 92(8): 599-604.
30. Lyons CE, Grosso A, Drame FM, Ketende S, Diouf D, Ba I, et al. Physical and Sexual Violence Affecting Female Sex Workers in Abidjan, Cote d'Ivoire: Prevalence, and the Relationship with the Work Environment, HIV, and Access to Health Services. *JAIDS Journal of Acquired Immune Deficiency Syndromes*. May 2017, 75(1):9-17.
31. World Health Organization, Assessment of khat (*Catha edulis* Forsk) 34th ECDD 2006/4.4. [http://www.who.int/medicines/areas/quality\\_safety/4.4KhatCritReview.pdf](http://www.who.int/medicines/areas/quality_safety/4.4KhatCritReview.pdf).
32. Wilson KS, Deya R, Masese L, Simoni JM, Stoep AV, Shafi J, et al. Prevalence and correlates of intimate partner violence in HIV-positive women engaged in transactional sex in Mombasa, Kenya. *International Journal of STD & AIDS*. 2016 Nov; 27(13): 1194-203.
33. Semple SJ, Stockman JK, Pitpitan EV, Strathdee SA, Chavarin CV, Mendoza DV, et al. Prevalence and correlates of client-perpetrated violence against female sex workers in 13 Mexican cities. *PloS one*. November 23, 2015; 10 (11): e0143317.
34. Silverman JG. Adolescent female sex workers: invisibility, violence and HIV. *Archives of disease in childhood*. 2011 May; 96(5) : 478-81.

- 1  
2  
3 35.Sharma S, Singh S, Talukdar B. Understanding the Factors Associated with Alcohol Use  
4 among Female Sex Workers in a High HIV Prevalence Northeast State of India. *J Infect Dis*  
5 *Treat.* 2016; 2:1.  
6  
7 36.Wechsberg WM, Luseno WK, Lam W. Violence against substance-abusing South African sex  
8 workers: intersection with culture and HIV risk. *AIDS Care.* 2005;17(sup1):55-64.  
9  
10 37.George WH, Stoner SA. Understanding acute alcohol effects on sexual behavior. *Annual*  
11 *review of sex research.* 2000;11(1):92-124.  
12  
13 38.Mbonye M, Rutakumwa R, Weiss H, Seeley J. Alcohol consumption and high risk sexual  
14 behaviour among female sex workers in Uganda. *African Journal of AIDS Research.*  
15 2014;13(2):145-51.  
16  
17  
18  
19  
20  
21  
22  
23  
24  
25  
26  
27  
28  
29  
30  
31  
32  
33  
34  
35  
36  
37  
38  
39  
40  
41  
42  
43  
44  
45  
46  
47  
48  
49  
50  
51  
52  
53  
54  
55  
56  
57  
58  
59  
60

# Reporting checklist for cross sectional study.

Based on the STROBE cross sectional guidelines.

## Instructions to authors

Complete this checklist by entering the page numbers from your manuscript where readers will find each of the items listed below.

Your article may not currently address all the items on the checklist. Please modify your text to include the missing information. If you are certain that an item does not apply, please write "n/a" and provide a short explanation.

Upload your completed checklist as an extra file when you submit to a journal.

In your methods section, say that you used the STROBE cross sectional reporting guidelines, and cite them as:

von Elm E, Altman DG, Egger M, Pocock SJ, Gotsche PC, Vandembroucke JP. The Strengthening the Reporting of Observational Studies in Epidemiology (STROBE) Statement: guidelines for reporting observational studies.

|          |                     |                                                                                                 | Page   |
|----------|---------------------|-------------------------------------------------------------------------------------------------|--------|
|          |                     | Reporting Item                                                                                  | Number |
| Title    | <a href="#">#1a</a> | Indicate the study's design with a commonly used term in the title or the abstract              | 1      |
| Abstract | <a href="#">#1b</a> | Provide in the abstract an informative and balanced summary of what was done and what was found | 1      |



|    |                      |                     |                                                                   |         |
|----|----------------------|---------------------|-------------------------------------------------------------------|---------|
| 1  | Background /         | <a href="#">#2</a>  | Explain the scientific background and rationale for the           | 2       |
| 2  |                      |                     |                                                                   |         |
| 3  | rationale            |                     | investigation being reported                                      |         |
| 4  |                      |                     |                                                                   |         |
| 5  |                      |                     |                                                                   |         |
| 6  | Objectives           | <a href="#">#3</a>  | State specific objectives, including any prespecified             | 3       |
| 7  |                      |                     | hypotheses                                                        |         |
| 8  |                      |                     |                                                                   |         |
| 9  |                      |                     |                                                                   |         |
| 10 |                      |                     |                                                                   |         |
| 11 | Study design         | <a href="#">#4</a>  | Present key elements of study design early in the paper           | 4       |
| 12 |                      |                     |                                                                   |         |
| 13 |                      |                     |                                                                   |         |
| 14 |                      |                     |                                                                   |         |
| 15 | Setting              | <a href="#">#5</a>  | Describe the setting, locations, and relevant dates, including    | 4, 5, 6 |
| 16 |                      |                     | periods of recruitment, exposure, follow-up, and data collection  |         |
| 17 |                      |                     |                                                                   |         |
| 18 |                      |                     |                                                                   |         |
| 19 |                      |                     |                                                                   |         |
| 20 | Eligibility criteria | <a href="#">#6a</a> | Give the eligibility criteria, and the sources and methods of     | 5       |
| 21 |                      |                     | selection of participants.                                        |         |
| 22 |                      |                     |                                                                   |         |
| 23 |                      |                     |                                                                   |         |
| 24 |                      |                     |                                                                   |         |
| 25 |                      |                     |                                                                   |         |
| 26 |                      | <a href="#">#7</a>  | Clearly define all outcomes, exposures, predictors, potential     | 6       |
| 27 |                      |                     | confounders, and effect modifiers. Give diagnostic criteria, if   |         |
| 28 |                      |                     | applicable                                                        |         |
| 29 |                      |                     |                                                                   |         |
| 30 |                      |                     |                                                                   |         |
| 31 |                      |                     |                                                                   |         |
| 32 |                      |                     |                                                                   |         |
| 33 | Data sources /       | <a href="#">#8</a>  | For each variable of interest give sources of data and details of | 6       |
| 34 | measurement          |                     | methods of assessment (measurement). Describe                     |         |
| 35 |                      |                     | comparability of assessment methods if there is more than one     |         |
| 36 |                      |                     | group. Give information separately for for exposed and            |         |
| 37 |                      |                     | unexposed groups if applicable.                                   |         |
| 38 |                      |                     |                                                                   |         |
| 39 |                      |                     |                                                                   |         |
| 40 |                      |                     |                                                                   |         |
| 41 |                      |                     |                                                                   |         |
| 42 |                      |                     |                                                                   |         |
| 43 |                      |                     |                                                                   |         |
| 44 |                      |                     |                                                                   |         |
| 45 | Bias                 | <a href="#">#9</a>  | Describe any efforts to address potential sources of bias         | 2, 18   |
| 46 |                      |                     |                                                                   |         |
| 47 |                      |                     |                                                                   |         |
| 48 | Study size           | <a href="#">#10</a> | Explain how the study size was arrived at                         | 5       |
| 49 |                      |                     |                                                                   |         |
| 50 |                      |                     |                                                                   |         |
| 51 | Quantitative         | <a href="#">#11</a> | Explain how quantitative variables were handled in the            | 6       |
| 52 | variables            |                     | analyses. If applicable, describe which groupings were chosen,    |         |
| 53 |                      |                     | and why                                                           |         |
| 54 |                      |                     |                                                                   |         |
| 55 |                      |                     |                                                                   |         |
| 56 |                      |                     |                                                                   |         |
| 57 |                      |                     |                                                                   |         |
| 58 |                      |                     |                                                                   |         |
| 59 |                      |                     |                                                                   |         |
| 60 |                      |                     |                                                                   |         |

|    |                     |                      |                                                                                                                                                                                                                                                                                |                |  |
|----|---------------------|----------------------|--------------------------------------------------------------------------------------------------------------------------------------------------------------------------------------------------------------------------------------------------------------------------------|----------------|--|
| 1  | Statistical methods | <a href="#">#12a</a> | Describe all statistical methods, including those used to control for confounding                                                                                                                                                                                              | 7              |  |
| 2  |                     |                      |                                                                                                                                                                                                                                                                                |                |  |
| 3  |                     |                      |                                                                                                                                                                                                                                                                                |                |  |
| 4  |                     |                      |                                                                                                                                                                                                                                                                                |                |  |
| 5  |                     |                      |                                                                                                                                                                                                                                                                                |                |  |
| 6  |                     |                      |                                                                                                                                                                                                                                                                                |                |  |
| 7  |                     | <a href="#">#12b</a> | Describe any methods used to examine subgroups and interactions                                                                                                                                                                                                                | NA             |  |
| 8  |                     |                      |                                                                                                                                                                                                                                                                                |                |  |
| 9  |                     |                      |                                                                                                                                                                                                                                                                                |                |  |
| 10 |                     |                      |                                                                                                                                                                                                                                                                                |                |  |
| 11 |                     |                      |                                                                                                                                                                                                                                                                                |                |  |
| 12 |                     | <a href="#">#12c</a> | Explain how missing data were addressed                                                                                                                                                                                                                                        | 8              |  |
| 13 |                     |                      |                                                                                                                                                                                                                                                                                |                |  |
| 14 |                     |                      |                                                                                                                                                                                                                                                                                |                |  |
| 15 |                     | <a href="#">#12d</a> | If applicable, describe analytical methods taking account of sampling strategy                                                                                                                                                                                                 | NA             |  |
| 16 |                     |                      |                                                                                                                                                                                                                                                                                |                |  |
| 17 |                     |                      |                                                                                                                                                                                                                                                                                |                |  |
| 18 |                     |                      |                                                                                                                                                                                                                                                                                |                |  |
| 19 |                     |                      |                                                                                                                                                                                                                                                                                |                |  |
| 20 |                     |                      |                                                                                                                                                                                                                                                                                |                |  |
| 21 |                     | <a href="#">#12e</a> | Describe any sensitivity analyses                                                                                                                                                                                                                                              | 7              |  |
| 22 |                     |                      |                                                                                                                                                                                                                                                                                |                |  |
| 23 | Participants        | <a href="#">#13a</a> | Report numbers of individuals at each stage of study—eg numbers potentially eligible, examined for eligibility, confirmed eligible, included in the study, completing follow-up, and analysed. Give information separately for for exposed and unexposed groups if applicable. | 5              |  |
| 24 |                     |                      |                                                                                                                                                                                                                                                                                |                |  |
| 25 |                     |                      |                                                                                                                                                                                                                                                                                |                |  |
| 26 |                     |                      |                                                                                                                                                                                                                                                                                |                |  |
| 27 |                     |                      |                                                                                                                                                                                                                                                                                |                |  |
| 28 |                     |                      |                                                                                                                                                                                                                                                                                |                |  |
| 29 |                     |                      |                                                                                                                                                                                                                                                                                |                |  |
| 30 |                     |                      |                                                                                                                                                                                                                                                                                |                |  |
| 31 |                     |                      |                                                                                                                                                                                                                                                                                |                |  |
| 32 |                     |                      |                                                                                                                                                                                                                                                                                |                |  |
| 33 |                     |                      |                                                                                                                                                                                                                                                                                |                |  |
| 34 |                     |                      |                                                                                                                                                                                                                                                                                |                |  |
| 35 |                     |                      |                                                                                                                                                                                                                                                                                |                |  |
| 36 |                     | <a href="#">#13b</a> | Give reasons for non-participation at each stage                                                                                                                                                                                                                               | 5              |  |
| 37 |                     |                      |                                                                                                                                                                                                                                                                                |                |  |
| 38 |                     |                      |                                                                                                                                                                                                                                                                                |                |  |
| 39 |                     | <a href="#">#13c</a> | Consider use of a flow diagram                                                                                                                                                                                                                                                 |                |  |
| 40 |                     |                      |                                                                                                                                                                                                                                                                                |                |  |
| 41 | Descriptive data    | <a href="#">#14a</a> | Give characteristics of study participants (eg demographic, clinical, social) and information on exposures and potential confounders. Give information separately for exposed and unexposed groups if applicable.                                                              |                |  |
| 42 |                     |                      |                                                                                                                                                                                                                                                                                |                |  |
| 43 |                     |                      |                                                                                                                                                                                                                                                                                |                |  |
| 44 |                     |                      |                                                                                                                                                                                                                                                                                |                |  |
| 45 |                     |                      |                                                                                                                                                                                                                                                                                |                |  |
| 46 |                     |                      |                                                                                                                                                                                                                                                                                |                |  |
| 47 |                     |                      |                                                                                                                                                                                                                                                                                |                |  |
| 48 |                     |                      |                                                                                                                                                                                                                                                                                |                |  |
| 49 |                     |                      |                                                                                                                                                                                                                                                                                |                |  |
| 50 |                     |                      |                                                                                                                                                                                                                                                                                |                |  |
| 51 |                     |                      |                                                                                                                                                                                                                                                                                |                |  |
| 52 |                     | <a href="#">#14b</a> | Indicate number of participants with missing data for each variable of interest                                                                                                                                                                                                | 8, 9 in tables |  |
| 53 |                     |                      |                                                                                                                                                                                                                                                                                |                |  |
| 54 |                     |                      |                                                                                                                                                                                                                                                                                |                |  |
| 55 |                     |                      |                                                                                                                                                                                                                                                                                |                |  |
| 56 |                     |                      |                                                                                                                                                                                                                                                                                |                |  |
| 57 | Outcome data        | <a href="#">#15</a>  | Report numbers of outcome events or summary measures.                                                                                                                                                                                                                          | na             |  |
| 58 |                     |                      |                                                                                                                                                                                                                                                                                |                |  |
| 59 |                     |                      |                                                                                                                                                                                                                                                                                |                |  |
| 60 |                     |                      |                                                                                                                                                                                                                                                                                |                |  |

|    |                  |                                                                                        |        |
|----|------------------|----------------------------------------------------------------------------------------|--------|
| 1  |                  | Give information separately for exposed and unexposed                                  |        |
| 2  |                  | groups if applicable.                                                                  |        |
| 3  |                  |                                                                                        |        |
| 4  |                  |                                                                                        |        |
| 5  |                  |                                                                                        |        |
| 6  | Main results     | <a href="#">#16a</a> Give unadjusted estimates and, if applicable, confounder-         | 7 - 10 |
| 7  |                  | adjusted estimates and their precision (eg, 95% confidence                             |        |
| 8  |                  | interval). Make clear which confounders were adjusted for and                          |        |
| 9  |                  | why they were included                                                                 |        |
| 10 |                  |                                                                                        |        |
| 11 |                  |                                                                                        |        |
| 12 |                  |                                                                                        |        |
| 13 |                  |                                                                                        |        |
| 14 |                  |                                                                                        |        |
| 15 |                  |                                                                                        |        |
| 16 |                  | <a href="#">#16b</a> Report category boundaries when continuous variables were         |        |
| 17 |                  | categorized                                                                            |        |
| 18 |                  |                                                                                        |        |
| 19 |                  |                                                                                        |        |
| 20 |                  |                                                                                        |        |
| 21 |                  | <a href="#">#16c</a> If relevant, consider translating estimates of relative risk into |        |
| 22 |                  | absolute risk for a meaningful time period                                             |        |
| 23 |                  |                                                                                        |        |
| 24 |                  |                                                                                        |        |
| 25 |                  |                                                                                        |        |
| 26 | Other analyses   | <a href="#">#17</a> Report other analyses done—e.g., analyses of subgroups and         | 10 -16 |
| 27 |                  | interactions, and sensitivity analyses                                                 |        |
| 28 |                  |                                                                                        |        |
| 29 |                  |                                                                                        |        |
| 30 |                  |                                                                                        |        |
| 31 |                  |                                                                                        |        |
| 32 | Key results      | <a href="#">#18</a> Summarise key results with reference to study objectives           |        |
| 33 |                  |                                                                                        |        |
| 34 |                  |                                                                                        |        |
| 35 | Limitations      | <a href="#">#19</a> Discuss limitations of the study, taking into account sources of   | 18     |
| 36 |                  | potential bias or imprecision. Discuss both direction and                              |        |
| 37 |                  | magnitude of any potential bias.                                                       |        |
| 38 |                  |                                                                                        |        |
| 39 |                  |                                                                                        |        |
| 40 |                  |                                                                                        |        |
| 41 |                  |                                                                                        |        |
| 42 | Interpretation   | <a href="#">#20</a> Give a cautious overall interpretation considering objectives,     | 16 -18 |
| 43 |                  | limitations, multiplicity of analyses, results from similar studies,                   |        |
| 44 |                  | and other relevant evidence.                                                           |        |
| 45 |                  |                                                                                        |        |
| 46 |                  |                                                                                        |        |
| 47 |                  |                                                                                        |        |
| 48 |                  |                                                                                        |        |
| 49 |                  |                                                                                        |        |
| 50 | Generalisability | <a href="#">#21</a> Discuss the generalisability (external validity) of the study      | 19     |
| 51 |                  | results                                                                                |        |
| 52 |                  |                                                                                        |        |
| 53 |                  |                                                                                        |        |
| 54 |                  |                                                                                        |        |
| 55 | Funding          | <a href="#">#22</a> Give the source of funding and the role of the funders for the     | 20     |
| 56 |                  | present study and, if applicable, for the original study on which                      |        |
| 57 |                  |                                                                                        |        |
| 58 |                  |                                                                                        |        |
| 59 |                  |                                                                                        |        |
| 60 |                  |                                                                                        |        |

1 the present article is based

2  
3 The STROBE checklist is distributed under the terms of the Creative Commons Attribution License  
4  
5  
6 CC-BY. This checklist can be completed online using <https://www.goodreports.org/>, a tool made by  
7  
8 the [EQUATOR Network](#) in collaboration with [Penelope.ai](#)  
9  
10  
11  
12  
13  
14  
15  
16  
17  
18  
19  
20  
21  
22  
23  
24  
25  
26  
27  
28  
29  
30  
31  
32  
33  
34  
35  
36  
37  
38  
39  
40  
41  
42  
43  
44  
45  
46  
47  
48  
49  
50  
51  
52  
53  
54  
55  
56  
57  
58  
59  
60

# BMJ Open

## Prevalence and correlates of physical violence and rape among female sex workers in Ethiopia: A cross-sectional study with respondent-driven sampling from 11 major towns

|                                 |                                                                                                                                                                                                                                       |
|---------------------------------|---------------------------------------------------------------------------------------------------------------------------------------------------------------------------------------------------------------------------------------|
| Journal:                        | <i>BMJ Open</i>                                                                                                                                                                                                                       |
| Manuscript ID                   | bmjopen-2018-028247.R2                                                                                                                                                                                                                |
| Article Type:                   | Research                                                                                                                                                                                                                              |
| Date Submitted by the Author:   | 05-Apr-2019                                                                                                                                                                                                                           |
| Complete List of Authors:       | Amogne, Minilik; Lunds Universitet, social medicin and global health; Ethiopian Public Health Institute, TB/HIV Department<br>Balcha, Taye; Armauer Hansen Research Institute<br>Agardh, Anette; Lunds University Faculty of Medicine |
| <b>Primary Subject Heading</b>: | Public health                                                                                                                                                                                                                         |
| Secondary Subject Heading:      | Public health, Sexual health, HIV/AIDS, Epidemiology                                                                                                                                                                                  |
| Keywords:                       | female sex workers, physical violence, rape, Substance use, Ethiopia                                                                                                                                                                  |
|                                 |                                                                                                                                                                                                                                       |

SCHOLARONE™  
Manuscripts

1  
2  
3 **Prevalence and correlates of physical violence and rape among female sex workers in**  
4 **Ethiopia: A cross-sectional study with respondent-driven sampling from 11 major towns**

5 Minilik Demissie<sup>1,2</sup>, Taye Tolera Balcha<sup>3</sup>, Anette Agardh<sup>1</sup>  
6  
7  
8  
9

10 Author affiliation

- 11  
12 1. Social Medicine and Global Health, Department of Clinical Sciences, Malmo, Lund  
13 University, Malmo, Sweden  
14  
15 2. Ethiopian Public Health Institute, Addis Ababa, Ethiopia  
16  
17 3. Armauer Hansen Research Institute, Addis Ababa, Ethiopia  
18  
19

20 Corresponding author

21 Minilik Demissie Amogne, minilik.demissie@med.lu.se  
22  
23  
24  
25  
26

27 **Abstract**

28 **Objective:** This study examined the prevalence and correlates of physical violence and rape  
29 among FSWs in Ethiopia.  
30

31 **Design:** A cross-sectional study using respondent-driven sampling technique  
32

33 **Setting:** Eleven major towns in Ethiopia  
34

35 **Participants:** 4900 female sex workers (FSWs)  
36

37 **Main outcome measures:** The prevalence of experiences of physical beating and rape  
38

39 **Results:** Among FSWs, 17.5% reported physical beating within the past year and 15.2% reported  
40 rape since they started selling sex. FSWs aged 35+ years (AOR 0.59, 95% CI 0.38, 0.92) were less  
41 exposed to physical beating than those aged 15-24 years. FSWs working on the street (AOR 1.92,  
42 95% CI 1.53, 2.39), in red-light houses (AOR 1.63, 95% CI 1.12, 2.38) and in local drinking houses  
43 (AOR 1.35, 95% CI 1.02, 1.78) experienced more physical beating than FSWs working in  
44 bars/hotels. FSWs who consumed alcohol four or more days in a week (AOR 1.92, 95% CI 1.21,  
45 3.04), and who chewed khat frequently experienced more physical violence. Rape was associated  
46 with having a low monthly income, drinking alcohol four or more days per week (AOR 2.33, 95%  
47 CI 1.47, 3.7), experience of heavy episodic drinking in a month (AOR 1.71, 95% CI 1.24, 2.38),  
48 and chewing khat 3-4 days per week (AOR 2.15, 95% CI 1.55, 2.98). Condom breakage was more  
49  
50  
51  
52  
53  
54  
55

1  
2  
3 frequent among FSWs who reported both physical beating (AOR 1.51, 95% CI 1.25, 1.84) and rape  
4 (AOR 1.26, 95% CI 1.03, 1.55).

5  
6 **Conclusion:** FSWs in Ethiopia are vulnerable to physical and sexual violence, and the risk  
7 increases when they are younger, street-based, and high consumers of alcohol or khat. Therefore,  
8 targeted efforts are needed for prevention and harm reduction.  
9

10  
11  
12 **Key words:** female sex workers, physical violence, rape, substance use, Ethiopia  
13

### 14 15 **Strengths and limitations of this study**

- 16 • The study involves multiple sites (eleven large towns) across the country with a large  
17 sample size.
- 18 • The study used a respondent-driven sampling, a technique which is recommended for hard  
19 to reach populations.
- 20 • Sexual and physical violence are sensitive topics that are subject to underreporting because  
21 of social desirability bias.
- 22 • Recall bias could have occurred because participants were asked about physical violence  
23 in the past year and rape since they started selling sex.
- 24 • Due to a cross-sectional study design, the influence of alcohol use/Khat chewing must be  
25 interpreted with caution, since the participants' current consumption status might not be an  
26 accurate indicator of the consumption status at the time of the violence.  
27  
28  
29  
30  
31  
32  
33  
34  
35  
36  
37  
38  
39  
40  
41  
42  
43  
44  
45  
46  
47  
48  
49  
50  
51  
52  
53  
54  
55  
56  
57  
58  
59  
60

## Introduction

As per WHO definition, violence is the intentional use of physical force or power against another person or group, which has a high likelihood of resulting in injury, death, or sexual or psychological harm (1). Violence against women is a global phenomenon, as more than one in three women worldwide is beaten, coerced into sex, or abused in her lifetime (2). Furthermore, violence is one of the main contributors to poor sexual and reproductive health among women, leading to unintended pregnancy, self-induced abortions, gynecologic problems, sexual dysfunction, and sexually transmitted infections (STIs), including HIV (3, 4).

In most countries, female sex work is either illegal or has an uncertain legal status. For example, prostitution is not illegal but approaching sex workers in public is illegal; this makes authorities reluctant to offer protection or support, which in turn legitimizes violence and discrimination against sex workers (5). In the case of Ethiopia, it is illegal to operate a brothel or procure sex workers as a commercial activity, but the sale of sex by women is neither prohibited nor legally recognized as a profession (6). Female sex workers (FSWs) frequently face harassment and violence, not only because of their illegitimate status, but also as a manifestation of gender inequality and discrimination directed towards women (7, 8).

Violence against FSWs can be perpetrated by anyone, including policemen, intimate partners, and clients. In Adama and Mekelle towns in Ethiopia, nearly 60% and 75% of female sex workers, respectively, reported lifetime violence (9, 10). In the same study in Adama, 8% of FSW reported forced sex since they started sex work (10). In another study conducted among homeless street females in Bahirdar town, 11.4% of them reported having been raped during the last one year period (11). In Uganda, 40% of FSWs reported physical abuse and 49 % had been raped at least once in their lifetime (12). In another study conducted in Hunan, China and Karnataka, India, 16% and 9% of female sex workers, respectively, reported work-related violence (13, 14).

Several risk factors have been found to have an association with physical and sexual violence against FSWs. Socio-economic characteristics, risky sexual behaviors and substance abuse are the most mentioned factors worldwide (9, 10, 15, 16). A randomized controlled trial study in Kenya and South Africa showed that alcohol consumption reduction by FSWs had a significant



1  
2  
3 contribution to violence reduction (17, 18). Moreover, establishments where alcohol and other  
4 drugs are consumed are associated with an increased likelihood of people becoming violent  
5 towards sex workers (8, 19). However, other studies suggest that FSWs who work outdoors face  
6 more violence than those who work indoors (20, 21).  
7  
8  
9

10  
11 Violence towards FSWs may also be associated with condom use and condom breakage. Studies  
12 conducted among FSWs have found several intentional and unintentional factors associated with  
13 condom breakages during sex work. These factors included being drunk or high on drugs, wearing  
14 unfitting condoms, incorrect condom use, and having violent or rough sex (22, 23). Moreover,  
15 violence towards FSWs may also be linked to disagreement over condom use, which increases the  
16 risk of acquiring HIV and other STIs (21, 24-26). In Ethiopia, the weighted HIV prevalence among  
17 FSWs is estimated to be 23% (27), while it is 1.2 % in the general population (28), which shows  
18 the magnitude of the potential risk exposure among FSWs. In addition, violence also prevents sex  
19 workers from seeking appropriate health services (26, 29, 30).  
20  
21  
22  
23  
24  
25  
26

27 In general, 120,000 to 160,000 FSWs are estimated to live in Ethiopia, working in different venues,  
28 mainly in bars and hotels, Key-mebrat (red lighthouses), local drinking houses, and on the street  
29 (27). Currently, the number of female sex workers is growing, with increasing numbers of young  
30 girls entering the sex trade.  
31  
32  
33  
34

35 This study explores the prevalence and correlates of physical violence and rape among FSWs in  
36 Ethiopia. Successful strategies for handling the trauma may vary by the type of violence  
37 experienced. Therefore, identification of risk factors that are specific to various types of violence  
38 has the potential to inform the development of evidence-based prevention programs. In addition,  
39 generating such types of evidence based on national level data will help to promote more effective  
40 prevention for female sex workers.  
41  
42  
43  
44  
45  
46  
47  
48  
49  
50  
51  
52  
53  
54  
55  
56  
57  
58  
59  
60

## Methods

### Study design

This study was part of a larger study concerning HIV prevalence and related risk factors among female sex workers and long-distance drivers that was carried out in Ethiopia in 2014. A cross-sectional study design using Respondent Driven Sampling technique (RDS) was used for data collection. RDS is a complex sampling method based on a chain-referral design and recommended for hard-to-reach populations. At all data collection sites, initial FSW “seeds” were selected to start the sampling process. Seeds were selected purposively to represent the type of sex worker, age category, and geographic location. They were identified through formative assessments with key stakeholders working with FSWs and representatives of FSWs. The selected seeds were those who were well-connected with their community and reported large social networks.

A maximum of three recruits per seed was allowed and only one-time participation was ensured by using a fingerprint scanning device. Recruitment pattern (who recruited whom) was tracked and network size was also determined.

### Study area, period and population

The study locations were the seven major regional towns and the four main transport corridor towns. The seven major regional towns were: Addis Ababa, Bahirdar, Mekelle, Hawassa, Adama, Gambela, and Dire-dawa. The four transport corridor towns were Semera-Logia (Addis Ababa-Djibouti route), Kombolcha (Addis Ababa-Mekelle route), Metema (Addis Ababa-Metema route) and Shashemene (Addis Ababa - Moyale route).

The source populations were all female sex workers living in those selected eleven towns. For the purpose of the study, female sex workers were defined as follows: ‘women who practice sexual activity with the pre-conditions of financial or in-kind benefits’. The inclusion criteria were: receiving money or other benefits for sex with four or more people within the last 30 days, being 15 and above years old, properly recruited by a peer (present with the coupon) and giving consent both for the interview and blood drawing.

### Sample size

The source study protocol calculated sample size of 400 female sex workers in each town using anticipated HIV prevalence of 25%, 6% precision, 95% CI, and design effect of two. However, the number of female sex workers who participated in each town was not exactly 400, and the total number of FSWs who participated in the study was 4900.

### Data collection procedure

Six seed FSWs were selected to initiate coupon-based recruitment. Eligible FSWs who provided informed consent to participate were administered a face to face interview in a private room by a nurse with a structured questionnaire in Amharic language. They then provided blood specimens for HIV, CD4 and viral load testing in a private room. When the process was completed, participants were provided with up to three coupons and instructed to recruit their FSW peers into the study. To compensate the time and costs of transport, a primary incentive of 100 ETB (\$5.0) and additional 50 ETB (\$2.5) for each eligible peer she enrolled into the study was given. An electronic data base for tracking coupons and recruitment was established with participant ID, fingerprint code, and a pre-printed label that was scanned. The data collection tools and questionnaire were pretested in a pilot study; feedback from the pilot study was used to finalize the data collection tools and field logistic and operational procedures. The questionnaire included: socio-demographic characteristics, sexual risk exposure, sexual behaviors, condom use, history of STI symptoms, alcohol and drug use consumption, violence related issues, knowledge of HIV transmission, and HIV testing history.

### Variables

Violence was assessed with two dependent variables, which were physical beating during the last one year and rape since sex selling started. The following questions were asked: “When exchanging sex for money during the last one year, have you ever been physically beaten by a sexual partner or client?” and “Have you ever been raped or forced to have sex against your will since you start selling sex?”. Responses were dichotomized into a Yes and No variable for analysis. For both of the questions, all who had reported beating and rape at least once were considered as having experienced violence (Yes).

1  
2  
3 The different time periods used to assess experiences of physical beating and rape were based on  
4 the presumed frequency of the two different types of violence. Physical beating might occur more  
5 frequently, while rape presumably occurs less frequently. Therefore, to measure the general burden  
6 of the two experiences, We specifically selected the time period that might be appropriate for the  
7 recall of the particular experience.  
8  
9  
10

11  
12 The independent measures included current age, monthly income from selling sex, marital status,  
13 educational status, sex selling venue, khat chewing, alcohol drinking, HIV status, and condom  
14 breakage.  
15  
16  
17

18 Current age was a continuous variable and for the purpose of analysis was categorized as ten-year  
19 intervals: younger (15-24), middle age (25-34), and older one (35+), with the younger age group  
20 used as the reference category. Monthly income from selling sex was an open-ended question and  
21 for the analysis was categorized into 1000Birr (\$50) intervals considering the cost of living in the  
22 country. Educational status was categorized as no formal education, primary first cycle (grade 1-  
23 4), primary second cycle (grade 5-8), and secondary and above for analysis, in accordance with  
24 the country education system.  
25  
26  
27  
28  
29

30 In addition, sex workers were categorized based on their sex selling venue, where bar/hotel was  
31 used as the reference because it is the most common FSW working venue. In addition, this venue  
32 category has better security than the other venues, and there were greater numbers of FSWs in  
33 this category.  
34  
35  
36  
37

38 Alcohol consumption was measured through different approaches including frequency of alcohol  
39 consumption, number of drinks per specific day and frequency of heavy episodic drinking (6 or  
40 more standard drinks per day).  
41  
42  
43

44 Frequency of Khat chewing was assessed according to the number of days that they chewed in a  
45 week. Khat (*Catha edulis*) is a stimulant leaf, and after chewing Khat, an individual may become  
46 talkative, alert, feel excitement, increased self-esteem, and increased imagination (31). Khat  
47 chewing is also popular among FSWs, as it is a means to spend the day time, to be active during  
48 the night for sex work and to socialize with each other.  
49  
50  
51  
52  
53  
54

### **Data analysis**

Statistical analysis was performed using SPSS Version 20. Descriptive statistics were used to provide summary measures (means, frequencies). Odds ratios (crude and adjusted) and 95% confidence intervals (CI) were obtained using bivariate and multivariate logistic regression analysis. Those independent variables significantly associated with the outcome variable in the bivariate analysis were included in the multivariate analysis. In addition, correlation analysis was performed to examine potential multicollinearity; no correlation was found between the variables. Cases with missing data were excluded from the analyses. Significance was accepted at p-value <0.05.

During data collection, we did not specifically assess where FSWs experienced the violence (in the current town or in another town). Because FSWs are highly mobile from one town to another, it would be biased to assume that their experiences of violence occurred in any one town. Therefore, during analysis, we did not conduct any cluster effect analysis.

### **Ethical considerations**

Permission for data use was obtained from the Ethiopian Public Health Institute (EPHI). The protocol was cleared at the Scientific and Ethical Research Office (SERO) of EPHI, the Ethiopian Science and Technology Ministry Ethical Committee, and CDC-Atlanta IRB. Individual written informed consent was obtained from each participant for the interview and blood sample collection while the study was conducted.

### **Patient and Public Involvement**

During the design or implementation of the study, no patients were involved in the development of the research question and outcome measures. Nevertheless, due to the nature of the respondent driven sampling methodology, an assessment was conducted to identify seeds and hotspot areas for the actual data collection. This assessment was conducted in collaboration with organizations working with FSWs and an active member of FSWs in those organizations. The primary results will be disseminated by publication in peer-reviewed journals and presented at the national level for stakeholders working with FSWs.

## Results

### Socio-demographic and other background characteristics

A total of 4900 female sex workers participated in the study. Demographic, socioeconomic and other background characteristics of the participants are shown in Table 1. The majority of the participants were between 15 to 24 years old with a mean age of 24 years (SD= 5.7); 44 % of them were divorced, separated or widowed. A quarter of them reported being uneducated and 40% of them earned on average less than \$50 per month. Regarding sex selling starting age, the majority started selling sex between the ages of 18-24 years, although nearly 25% started before the age of 18. FSWs worked in different eating, drinking and recreation establishments and also other venues; 33% recruited their clients in bars/hotels, followed by 26.5% on the street and 20% in local drinking houses (Table 1).

**Table 1. Distribution of socio-demographic and other background characteristics among 4900 female sex workers across eleven towns, Ethiopia**

| Variable                        | Frequency | Percentage |
|---------------------------------|-----------|------------|
| <b>Age</b>                      |           |            |
| 15-24                           | 2831      | 57.8       |
| 25-34                           | 1700      | 34.7       |
| 35+                             | 369       | 7.5        |
| Total                           | 4900      | 100.0      |
| Missing                         | 0         |            |
| Mean age of respondents = 24.16 |           |            |
| SD= 5.7                         |           |            |
| <b>Educational status</b>       |           |            |
| No Education                    | 1224      | 25.0       |
| Primary 1st cycle (1-4)         | 764       | 16.0       |
| Primary 2nd cycle (5-8)         | 2062      | 42.0       |
| Secondary & above               | 831       | 17.0       |
| Total                           | 4881      | 100.0      |

|                                        |      |       |
|----------------------------------------|------|-------|
| Missing                                | 19   |       |
| <b>Sex selling venues</b>              |      |       |
| Bar/Hotel                              | 1613 | 33.0  |
| Local drinking houses                  | 983  | 20.1  |
| Spa/Massage/Beauty salon/Own house     | 261  | 5.3   |
| Red-light houses                       | 429  | 8.8   |
| Street                                 | 1295 | 26.5  |
| Others                                 | 304  | 6.2   |
| Total                                  | 4885 | 100.0 |
| Missing                                | 15   |       |
| <b>Current marital status</b>          |      |       |
| Never Married                          | 2698 | 55.2  |
| Married/Cohabited                      | 37   | 0.8   |
| Separated/Divorced                     | 1976 | 40.5  |
| Widowed                                | 173  | 3.5   |
| Total                                  | 4884 | 100.0 |
| Missing                                | 16   |       |
| <b>Sex selling starting age</b>        |      |       |
| Less than 15                           | 120  | 2.5   |
| 15 - 17                                | 1088 | 22.3  |
| 18 - 24                                | 2864 | 58.7  |
| 25 - 29                                | 583  | 12.0  |
| 30 & Above                             | 220  | 4.5   |
| Total                                  | 4875 | 100.0 |
| Missing                                | 25   |       |
| <b>Monthly income from selling sex</b> |      |       |
| Less than 1000 (<\$50)                 | 1932 | 39.6  |
| 1001 – 2000 (\$50-\$100)               | 1554 | 31.8  |
| 2001 – 3000 (\$100-\$150)              | 812  | 16.6  |
| 3001 – 4000 (\$150-\$200)              | 318  | 6.5   |

|                           |      |       |
|---------------------------|------|-------|
| 4001 – 5000 (\$200-\$250) | 150  | 3.1   |
| Above 5000 (>\$250)       | 117  | 2.4   |
| Total                     | 4883 | 100.0 |
| Missing                   | 17   |       |

### Behavioral and other related factors

Table 2 shows the prevalence of behavioral and other factors. The majority (70%) of the respondents consumed alcohol and of those, 15.8% had drunk so much on a typical day within the past 30 days that they did not remember what happened the next day. About half of the respondents chewed khat and 23.8% of them chewed almost every day (5-7 days a week).

Regarding condom use, 25.5% of them reported condom breakage within the past 30 days prior to the study. HIV/AIDS status of the respondents was also assessed and a quarter of them (23%) were HIV positive. With regard to physical and sexual violence experience, 17.5% of them reported physical beating within the past 12 months and 15.2% reported having been raped since they started selling sex. (Table 2)

**Table 2. Behavioral and other related factors among 4900 female sex workers across eleven towns, Ethiopia**

| Variable                             | Frequency | Percentage |
|--------------------------------------|-----------|------------|
| <b>Frequency alcohol consumption</b> |           |            |
| Never                                | 1493      | 30.6       |
| Once a month or less                 | 222       | 4.5        |
| 2 - 4 days a month                   | 492       | 10.1       |
| 2 - 3 days a week                    | 1394      | 28.5       |
| 4 or more days a week                | 1283      | 26.3       |
| Total                                | 4884      | 100.0      |
| Missing                              | 16        |            |

### Alcohol containing drinks on a typical day



|            |      |       |
|------------|------|-------|
| 1 or 2     | 806  | 23.8  |
| 3 or 4     | 1383 | 40.8  |
| 5 or 6     | 742  | 21.9  |
| 7 to 9     | 296  | 8.7   |
| 10 or more | 164  | 4.8   |
| Total      | 3391 | 100.0 |
| Missing    | 0    |       |

### Frequency of heavy episodic drinking

|                       |      |       |
|-----------------------|------|-------|
| Never                 | 1863 | 54.9  |
| Less than monthly     | 236  | 7.0   |
| Monthly               | 299  | 8.8   |
| Weekly                | 630  | 18.6  |
| Daily or almost daily | 363  | 10.7  |
| Total                 | 3391 | 100.0 |
| Missing               | 0    |       |

### Drunk so much and can't remember

#### what happened the next day

|                          |      |       |
|--------------------------|------|-------|
| Yes, in last 30 days     | 534  | 15.8  |
| Yes, not in last 30 days | 233  | 6.9   |
| No                       | 2609 | 77.2  |
| Don't remember           | 4    | 0.1   |
| Total                    | 3380 | 100.0 |
| Missing                  | 11   |       |

### Frequency of khat chewing

|                       |      |       |
|-----------------------|------|-------|
| Never                 | 2431 | 49.8  |
| Less than once a week | 577  | 11.8  |
| 1-2 days per week     | 429  | 8.8   |
| 3-4 days per week     | 284  | 5.8   |
| 5-7 days per week     | 1162 | 23.8  |
| Total                 | 4883 | 100.0 |

|    |                                                |      |       |
|----|------------------------------------------------|------|-------|
| 1  |                                                |      |       |
| 2  |                                                |      |       |
| 3  | Missing                                        | 17   |       |
| 4  |                                                |      |       |
| 5  | <b>Condom breakage in the past 30 days</b>     |      |       |
| 6  | Yes                                            | 1243 | 25.5  |
| 7  | No                                             | 3635 | 74.5  |
| 8  |                                                |      |       |
| 9  | Total                                          | 4878 |       |
| 10 | Missing                                        | 22   |       |
| 11 |                                                |      |       |
| 12 | <b>HIV status</b>                              |      |       |
| 13 | Negative                                       | 3708 | 76.0  |
| 14 | Positive                                       | 1173 | 24.0  |
| 15 | Total                                          | 4881 | 100.0 |
| 16 | Missing                                        | 19   |       |
| 17 |                                                |      |       |
| 18 | <b>Ever been raped or forced to have sex</b>   |      |       |
| 19 | <b>since start selling sex</b>                 |      |       |
| 20 | No                                             | 4142 | 84.8  |
| 21 | Yes                                            | 742  | 15.2  |
| 22 | Total                                          | 4884 | 100.0 |
| 23 | Missing                                        | 16   |       |
| 24 |                                                |      |       |
| 25 | <b>Physically beaten in the last 12 months</b> |      |       |
| 26 | No                                             | 4026 | 82.5  |
| 27 | Yes                                            | 855  | 17.5  |
| 28 | Total                                          | 4881 | 100.0 |
| 29 | Missing                                        | 19   |       |
| 30 |                                                |      |       |
| 31 |                                                |      |       |
| 32 |                                                |      |       |
| 33 |                                                |      |       |
| 34 |                                                |      |       |
| 35 |                                                |      |       |
| 36 |                                                |      |       |
| 37 |                                                |      |       |
| 38 |                                                |      |       |
| 39 |                                                |      |       |
| 40 |                                                |      |       |

### Bivariate regression analysis outcome

Table 3 shows the bivariate logistic regression results; each independent variable was analyzed separately against the two outcome variables. The variables that were significantly associated with physical violence were: age, educational level, monthly income, current marital status, sex selling venues, frequency of alcohol consumption, alcohol containing drinks on a typical day, frequency of heavy episodic drinking, frequency of khat chewing in a week and condom breakage. Variables

significantly associated with rape were: educational level, income from selling sex, frequency of alcohol consumption, alcohol containing drinks on a typical day, frequency of heavy episodic drinking, frequency of khat chewing in a week and condom breakage. HIV status was not significantly associated with either physical violence or rape.

**Table 3. Bivariate logistic regression analyses of independent variables associated with physically beaten in the last 12 months and ever been raped since start selling sex, odds ratios (OR) and 95% confidence intervals (CI)**

| Variables                              | Physical beating<br>OR (95% CI) | Rape<br>OR (95% CI) |
|----------------------------------------|---------------------------------|---------------------|
| <b>Age</b>                             |                                 |                     |
| 15-24*                                 |                                 |                     |
| 25-34                                  | 1.02 (0.87, 1.19)               | 1.02 (0.86, 1.21)   |
| 35+                                    | 0.52 (0.37, 0.74)               | 0.88 (0.64, 1.20)   |
| <b>Educational level</b>               |                                 |                     |
| No Education*                          |                                 |                     |
| Primary 1st cycle (1-4)                | 1.01 (0.79, 1.31)               | 1.45 (1.14,1.85)    |
| Primary 2nd cycle (5-8)                | 1.35 (1.11, 1.63)               | 1.08 (0.88,1.32)    |
| Secondary & above                      | 1.49 (1.18, 1.87)               | 1.09 (0.85,1.41)    |
| <b>Monthly income from selling sex</b> |                                 |                     |
| Less than 1000 birr (<\$50) *          |                                 |                     |
| 1001 – 2000 birr (\$50-\$100)          | 1.44 (1.20, 1.73)               | 0.69 (0.58, 0.85)   |
| 2001 – 3000 birr (\$100-\$150)         | 1.67 (1.35, 2.07)               | 0.51 (0.39, 0.66)   |
| 3001 – 4000 birr (\$150-\$200)         | 1.61 (1.19, 2.17)               | 0.65 (0.46, 0.92)   |
| 4001 – 5000 birr (\$200-\$250)         | 2.12 (1.44, 3.14)               | 1.01 (0.66, 1.55)   |
| Above 5000 birr (>\$250)               | 1.62 (1.01, 2.58)               | 0.75 (0.44, 1.27)   |
| <b>Current marital status</b>          |                                 |                     |
| Never Married*                         |                                 |                     |
| Married/Cohabited                      | 1.05 (0.46, 2.41)               | 0.69 (0.24, 1.96)   |
| Separated/Divorced                     | 0.93 (0.80, 1.09)               | 1.03 (0.88, 1.21)   |

|    |                                                   |                   |                   |
|----|---------------------------------------------------|-------------------|-------------------|
| 1  |                                                   |                   |                   |
| 2  |                                                   |                   |                   |
| 3  | Widowed                                           | 0.59 (0.37, 0.95) | 1.39 (0.95, 2.06) |
| 4  |                                                   |                   |                   |
| 5  | <b>Sex selling venues</b>                         |                   |                   |
| 6  | Bar/Hotel*                                        |                   |                   |
| 7  |                                                   |                   |                   |
| 8  | Local drinking houses                             | 0.87 (0.69, 1.09) | -                 |
| 9  |                                                   |                   |                   |
| 10 | Spa/Massage/Beauty salon/Own house                | 0.45 (0.28, 0.71) | -                 |
| 11 |                                                   |                   |                   |
| 12 | Red-light houses                                  | 0.95 (0.71, 1.27) | -                 |
| 13 |                                                   |                   |                   |
| 14 | Street                                            | 1.51 (1.26, 1.82) | -                 |
| 15 |                                                   |                   |                   |
| 16 | Others                                            | 1.37 (1.01, 1.86) | -                 |
| 17 | <b>Frequency alcohol consumption</b>              |                   |                   |
| 18 | Never*                                            |                   |                   |
| 19 |                                                   |                   |                   |
| 20 | 2 - 4 days a month                                | 1.82 (1.35, 2.44) | 1.74 (1.27, 2.38) |
| 21 |                                                   |                   |                   |
| 22 | 2 - 3 days a week                                 | 2.07 (1.66, 2.57) | 1.87 (1.48, 2.36) |
| 23 |                                                   |                   |                   |
| 24 | 4 or more days a week                             | 3.54 (2.87, 4.37) | 3.43 (2.75, 4.28) |
| 25 |                                                   |                   |                   |
| 26 | <b>Alcohol containing drinks on a typical day</b> |                   |                   |
| 27 | 1 or 2*                                           |                   |                   |
| 28 |                                                   |                   |                   |
| 29 | 3 or 4                                            | 1.39 (1.09, 1.76) | 1.16 (0.92, 1.46) |
| 30 |                                                   |                   |                   |
| 31 | 5 or 6                                            | 2.03 (1.58, 2.62) | 1.09 (0.84, 1.43) |
| 32 |                                                   |                   |                   |
| 33 | 7 to 9                                            | 2.19 (1.59, 3.03) | 0.98 (0.68, 1.41) |
| 34 |                                                   |                   |                   |
| 35 | 10 or more                                        | 2.76 (1.88, 4.03) | 1.78 (1.20, 2.65) |
| 36 | <b>Frequency of heavy episodic drinking</b>       |                   |                   |
| 37 | Never*                                            |                   |                   |
| 38 |                                                   |                   |                   |
| 39 | Less than monthly                                 | 1.43 (1.03, 1.98) | 1.39 (0.99, 1.95) |
| 40 |                                                   |                   |                   |
| 41 | Monthly                                           | 1.23 (0.90, 1.66) | 1.59 (1.18, 2.13) |
| 42 |                                                   |                   |                   |
| 43 | Weekly                                            | 1.73 (1.39, 2.14) | 1.03 (0.80, 1.31) |
| 44 |                                                   |                   |                   |
| 45 | Daily or almost daily                             | 1.97 (1.53, 2.55) | 1.69 (1.29, 2.21) |
| 46 | <b>Drunk so much and can't remember what</b>      |                   |                   |
| 47 | <b>happened the next day</b>                      |                   |                   |
| 48 | No*                                               |                   |                   |
| 49 |                                                   |                   |                   |
| 50 | Yes, in the last 30 days                          | 2.90 (2.37, 3.56) | 1.66 (1.33, 2.07) |
| 51 |                                                   |                   |                   |
| 52 | Yes, before last 30 days                          | 2.22 (1.65, 2.99) | 1.27 (0.91, 1.78) |
| 53 |                                                   |                   |                   |
| 54 |                                                   |                   |                   |
| 55 |                                                   |                   |                   |
| 56 |                                                   |                   |                   |
| 57 |                                                   |                   |                   |
| 58 |                                                   |                   |                   |
| 59 |                                                   |                   |                   |
| 60 |                                                   |                   |                   |

**Frequency of khat chewing in a week**

|                       |                   |                   |
|-----------------------|-------------------|-------------------|
| Never*                |                   |                   |
| Less than once a week | 1.24 (0.96, 1.60) | 0.89 (0.67, 1.19) |
| 1-2 days per week     | 1.67 (1.28, 2.18) | 2.89 (2.26, 3.69) |
| 3-4 days per week     | 2.49 (1.87, 3.34) | 2.92 (2.19, 3.89) |
| 5-7 days per week     | 2.48 (2.08, 2.96) | 1.47 (1.21, 1.79) |

**Condom breakage**

|     |                   |                   |
|-----|-------------------|-------------------|
| No* |                   |                   |
| Yes | 1.99 (1.69, 2.33) | 1.62 (1.37, 1.92) |

**HIV test result**

|           |                   |                   |
|-----------|-------------------|-------------------|
| Negative* |                   |                   |
| Positive  | 1.04 (0.88, 1.24) | 0.88 (0.73, 1.07) |

Note: \* Reference category

**Multivariate analysis of factors associated with physical violence (physically beaten)**

Table 4 shows the results of the multivariate analysis used to identify factors associated with physical violence after simultaneously adjusting for all measures included in the analyses. Female sex workers aged 35 years or above (AOR 0.59, 95% CI 0.38, 0.92) were significantly less likely to experience physical violence when compared with the younger age group (15-24 years). FSWs who had attended primary 1st cycle education (AOR 0.71, 95% CI 0.52, 0.97) were also less likely to experience physical beating than those who reported no education. On the other hand, FSWs who worked on the street (AOR 1.92, 95% CI 1.53, 2.39), in red-light houses (AOR 1.63, 95% CI 1.12, 2.38) and in local drinking houses (AOR 1.35, 95% CI 1.02, 1.78) have an increased odds of experiencing physical violence compared with FSWs who worked in bars/hotels. Moreover, substance use was significantly related to physical violence. FSWs who consumed alcohol four or more days in a week (AOR 1.92, 95% CI 1.21, 3.04), those who did not remember what happened the next day due to heavy alcohol consumption both in the past 30 days (AOR 1.98, 95% CI 1.58, 2.49), and before the past 30 days (AOR 1.85, 95% CI 1.35, 2.53), and FSWs who chewed khat 3-4 days per week (AOR 1.58, 95% CI 1.13, 2.21) and 5-7 days per week (AOR 1.43, 95% CI 1.13, 1.80) had more likelihood of experiencing physical violence. Condom breakage experience

within the past 30 days prior to the study was also significantly associated with physical violence (AOR 1.51, 95% CI 1.25, 1.84).

**Table 4. Multivariate logistic regression analysis of factors associated with physical violence (physically beaten) in the past twelve months among female sex workers across eleven towns in Ethiopia, odds ratios (OR) and 95% confidence intervals (CI).**

| Variables                              | OR (95%CI)        |
|----------------------------------------|-------------------|
| <b>Age</b>                             |                   |
| 15-24*                                 |                   |
| 25-34                                  | 1.04 (0.82, 1.22) |
| 35+                                    | 0.59 (0.38, 0.92) |
| <b>Educational level</b>               |                   |
| No Education*                          |                   |
| Primary 1st cycle (1-4)                | 0.71 (0.52, 0.97) |
| Primary 2nd cycle (5-8)                | 0.98 (0.77, 1.26) |
| Secondary & above                      | 1.14 (0.85, 1.53) |
| <b>Monthly income from selling sex</b> |                   |
| Less than 1000 birr (<\$50) *          |                   |
| 1001 – 2000 birr (\$50-\$100)          | 1.13 (0.90, 1.41) |
| 2001 – 3000 birr (\$100-\$150)         | 1.14 (0.87, 1.48) |
| 3001 – 4000 birr (\$150-\$200)         | 1.12 (0.77, 1.61) |
| 4001 – 5000 birr (\$200-\$250)         | 1.44 (0.93, 2.24) |
| Above 5000 birr (>\$250)               | 1.12 (0.63, 1.99) |
| <b>Current marital status</b>          |                   |
| Never Married*                         |                   |
| Married/Cohabited                      | 0.68 (0.24, 1.89) |
| Separated/Divorced                     | 1.08 (0.88, 1.29) |
| Widowed                                | 0.87 (0.48, 1.59) |
| <b>Sex selling venues</b>              |                   |
| Bar/Hotel*                             |                   |

|                                    |                   |
|------------------------------------|-------------------|
| Local drinking houses              | 1.35 (1.02, 1.78) |
| Spa/massage/beauty salon/own house | 1.04 (0.58, 1.84) |
| Red-light houses                   | 1.63 (1.12, 2.38) |
| Street                             | 1.92 (1.53, 2.39) |
| Others                             | 1.39 (0.98, 1.99) |

### Frequency alcohol consumption

|                       |                   |
|-----------------------|-------------------|
| Never*                |                   |
| 2 - 4 days a month    | 1.25 (0.77, 2.04) |
| 2 - 3 days a week     | 1.32 (0.84, 2.06) |
| 4 or more days a week | 1.92 (1.21, 3.04) |

### Alcohol containing drinks on a typical day

|            |                   |
|------------|-------------------|
| 1 or 2*    |                   |
| 3 or 4     | 1.08 (0.84, 1.39) |
| 5 or 6     | 1.15 (0.85, 1.57) |
| 7 to 9     | 1.09 (0.74, 1.64) |
| 10 or more | 1.14 (0.72, 1.81) |

### Frequency of heavy episodic drinking

|                       |                   |
|-----------------------|-------------------|
| Never*                |                   |
| Less than monthly     | 1.07 (0.75, 1.52) |
| Monthly               | 0.84 (0.59, 1.18) |
| Weekly                | 1.07 (0.82, 1.39) |
| Daily or almost daily | 0.99 (0.71, 1.38) |

### Drunk so much and can't remember what happened the next day

|                          |                   |
|--------------------------|-------------------|
| No*                      |                   |
| Yes, in the last 30 days | 1.98 (1.58, 2.49) |
| Yes, before last 30 days | 1.85 (1.35, 2.53) |

### Frequency of khat chewing in a week

|                       |                   |
|-----------------------|-------------------|
| Never*                |                   |
| Less than once a week | 1.04 (0.77, 1.42) |

|                        |                   |
|------------------------|-------------------|
| 1-2 days per week      | 1.30 (0.96, 1.77) |
| 3-4 days per week      | 1.58 (1.13, 2.21) |
| 5-7 days per week      | 1.43 (1.13, 1.80) |
| <b>Condom breakage</b> |                   |
| No*                    |                   |
| Yes                    | 1.51 (1.25, 1.84) |

Note: \* Reference category

### Multivariate analysis of factors associated with sexual violence (rape)

Table 5 shows the results of the multivariate logistic regression analyses to identify factors that were significantly associated with rape after simultaneously adjusting for all measures included in the analyses. Female sex workers with a monthly income of \$50 to \$200 were significantly less likely to experience rape compared to those with a monthly income of below \$50. Drinking alcohol four or more days per week (AOR 2.33, 95% CI 1.47, 3.7), experience of heavy drinking in the last 30 days and not remembering what happened the next day (AOR 1.34, 95% CI 1.05, 1.72), experience of heavy episodic drinking (HED) in a month (AOR 1.71, 95% CI 1.24, 2.38), experience of HED almost daily (AOR 1.49, 95% CI 1.06, 2.11) and chewing khat 1-2 days (AOR 2.13, 95% CI 1.61, 2.83) and 3-4 days (AOR 2.15, 95% CI 1.55, 2.98) per week were positively associated with rape. Moreover, condom breakage (AOR 1.26, 95% CI 1.03, 1.55) was significantly more frequent among FSWs who reported rape.

**Table 5. Multivariate logistic regression analysis of factors associated with sexual violence (rape) since sex selling start among female sex workers across eleven towns in Ethiopia, odds ratios (OR) and 95% confidence intervals (CI).**

| Variables                              | OR (95%CI)        |
|----------------------------------------|-------------------|
| <b>Monthly income from selling sex</b> |                   |
| Less than 1000 birr (<\$50) *          |                   |
| 1001 – 2000 birr (\$50-\$100)          | 0.62 (0.49, 0.77) |
| 2001 – 3000 birr (\$100-\$150)         | 0.42 (0.32, 0.57) |



|                                |                   |
|--------------------------------|-------------------|
| 3001 – 4000 birr (\$150-\$200) | 0.45 (0.29, 0.69) |
| 4001 – 5000 birr (\$200-\$250) | 0.84 (0.53, 1.33) |
| Above 5000 birr (>\$250)       | 0.62 (0.34, 1.15) |

### Current marital status

|                    |                   |
|--------------------|-------------------|
| Never Married*     |                   |
| Married/Cohabited  | 0.57 (0.17, 1.97) |
| Separated/Divorced | 1.01 (0.83, 1.22) |
| Widowed            | 1.61 (0.98, 2.63) |

### Educational level

|                         |                   |
|-------------------------|-------------------|
| No Education*           |                   |
| Primary 1st cycle (1-4) | 1.06 (0.79, 1.43) |
| Primary 2nd cycle (5-8) | 0.83 (0.65, 1.07) |
| Secondary & above       | 0.92 (0.68, 1.25) |

### Frequency of alcohol consumption

|                       |                   |
|-----------------------|-------------------|
| Never*                |                   |
| 2 - 4 days a month    | 1.15 (0.69, 1.89) |
| 2 - 3 days a week     | 1.24 (0.78, 1.96) |
| 4 or more days a week | 2.33 (1.47, 3.73) |

### Drunk so much and can't remember what happened the next day

|                          |                   |
|--------------------------|-------------------|
| No*                      |                   |
| Yes, in the last 30 days | 1.34 (1.05, 1.72) |
| Yes, before last 30 days | 1.07 (0.75, 1.52) |

### Frequency of heavy episodic drinking

|                       |                   |
|-----------------------|-------------------|
| Never*                |                   |
| Less than monthly     | 1.61 (1.12, 2.32) |
| Monthly               | 1.71 (1.24, 2.38) |
| Weekly                | 1.04 (0.78, 1.38) |
| Daily or almost daily | 1.49 (1.06, 2.11) |

### Frequency of khat chewing in a week

|    |                        |                   |
|----|------------------------|-------------------|
| 1  |                        |                   |
| 2  |                        |                   |
| 3  | Never*                 |                   |
| 4  |                        |                   |
| 5  | less than once a week  | 0.83 (0.59, 1.16) |
| 6  |                        |                   |
| 7  | 1-2 days per week      | 2.13 (1.61, 2.83) |
| 8  |                        |                   |
| 9  | 3-4 days per week      | 2.15 (1.55, 2.98) |
| 10 |                        |                   |
| 11 | 5-7 days per week      | 1.06 (0.83, 1.36) |
| 12 | <b>Condom breakage</b> |                   |
| 13 |                        |                   |
| 14 | No*                    |                   |
| 15 |                        |                   |
| 16 | Yes                    | 1.26 (1.03, 1.55) |

---

Note: \* Reference category

## Discussion

According to this study, 17.5% of FSWs in Ethiopia had been physically beaten within the past 12 months and 15.2% had been raped since they started selling sex. Age, sex selling venues, and high consumption of alcohol and khat were significant predictors of physical violence (beating). On the other hand, the significant predictors of sexual violence (rape) were low income and also high consumption of alcohol and khat.

The prevalence of both physical violence and sexual violence (rape) was lower than the prevalence found in studies conducted in Uganda, Ivory Coast, and Kenya(9, 12, 30, 32). However, when compared to the studies conducted in Adama (Ethiopia), China, India, and Mexico, the current study reported a higher prevalence of both physical and sexual violence (10, 11, 13, 14, 33). The difference in the definition of violence used might be one of the possible explanations for the difference between the current results and those found in other studies in Africa. Most of the studies assessed all forms of physical and sexual violence while the current study assessed solely physical beating and forced penetrative sex (rape). On the other hand, differences in results across settings might also be due to differences in background and contextual factors such as socio-economic status and cultural aspects.

Several studies showed that younger FSWs are more exposed to physical and sexual violence (13, 34) in line with the current findings that younger FSWs (15-24years) were at higher risk for

1  
2  
3 physical violence when compared to their older counterparts (35+years). Perpetrators' find it easier  
4 to manipulate younger FSWs and this might play a role in their increased exposure to violence.  
5 That younger FSWs are especially vulnerable to violence has important implications due to the  
6 increasing number of younger FSWs who are entering the sex trade. Therefore, to minimize the  
7 vulnerability of younger FSWs, intervention programs need to create awareness about the factors  
8 that increase the likelihood of violence and to ensure that younger FSWs are particularly addressed  
9 in such programs.  
10  
11  
12  
13  
14  
15

16 Even though sex work is not a legally recognized profession in Ethiopia, most of the establishments  
17 where the sex workers are based (hotels, bars/restaurants, nightclubs, etc.) operate legally with  
18 working licenses. Nevertheless, some FSWs work on the street and in red-light houses where they  
19 manage their own working area. Consequently, the extent to which physical violence occurs may  
20 vary according to their working area. The present study revealed that FSWs who mainly work in  
21 bars and hotels face less physical beating when compared with FSWs who work on the street, in  
22 red-light houses and local drinking houses. This finding is in-line with studies conducted in New  
23 York City and England (20, 21). This might be due to the level of protection in their working areas  
24 and/or due to the type of clients who frequents those localities. This means that engaging bar/hotel  
25 managers in the prevention activities could be an additional strategy to increase the effectiveness  
26 of harm reduction programs.  
27  
28  
29  
30  
31  
32  
33  
34  
35

36 On the other hand, FSWs who work on the street, in red-light houses and local drinking houses  
37 experience more violence. Most of these venues are located in the slum areas of the cities, and  
38 such areas are often the focus of police efforts to control various unwanted activities. In this regard,  
39 FSWs are one of the targets of the police and face harassment, beating, and arrest. Due to that, the  
40 reporting rate of violence is very poor, and the actions of the police also make the use of violence  
41 seem legitimate among FSWs. Therefore, to minimize the harm in these localities, involving the  
42 police force in violence prevention activities is crucial and should be one of the first steps. In  
43 addition, a peer education program led by the sex workers could be an additional strategy. It could  
44 help FSWs to create information sharing platform to discuss the incidences of violence, types of  
45 perpetrators, etc., which could raise awareness and help them to become more alert.  
46  
47  
48  
49  
50  
51  
52  
53  
54  
55

1  
2  
3 Furthermore, an association between alcohol use and higher frequency of physical violence and  
4 rape was reported. In particular, FSWs who consume alcohol more than four days a week and those  
5 with experience of HED were significantly more likely to experience violence. Several studies  
6 conducted in Ethiopia, Uganda, and Kenya also reported similar findings (9, 10, 12, 19). A large  
7 proportion of female sex workers (FSWs) use alcohol prior to or during sex to help them to solicit  
8 clients and overcome their shyness (35, 36). In particular high level of alcohol consumption places  
9 FSWs in disadvantaged situations by intensifying their vulnerability (8). Research reviews also  
10 report that alcohol use impairs FSWs' ability to detect the risk of violence and increases their  
11 vulnerability to risk-prone situations (37, 38). The consequences of HED are not just limited to the  
12 physical effects of intoxication but further exposes them to violence and risky sexual behaviors.  
13  
14  
15  
16  
17  
18  
19  
20

21 Correspondingly, chewing khat more days in a week was significantly associated with experience  
22 of physical violence and rape. After chewing khat, some of the users consume alcohol-containing  
23 drinks to decrease the level of stimulation. Although there is no previous study on the relationship  
24 between khat chewing and experience of violence among FSWs, most FSWs chew khat before  
25 departing for work. In the bar, they drink alcohol to minimize the effect, which in turn exposes  
26 them to HED and violence. Further studies should assess the contribution of Khat chewing to  
27 increasing violence experience independently.  
28  
29  
30  
31  
32  
33  
34

35 The extent to which alcohol use/Khat chewing are risk factors for the occurrence of experiences  
36 of violence must be interpreted with caution. Since physical beating was measured within the past  
37 12 months and rape was measured since they started selling sex, the participants' current Khat  
38 chewing or alcohol consumption status might not be an accurate indicator of the consumption  
39 status at the time of the violence. In addition, the current use of substances might be a means to  
40 cope with the trauma related to the experience of violence.  
41  
42  
43  
44  
45

46 In addition, the resistance to condom use from clients and the violence experience may create a  
47 difficult situation for FSWs with regard to proper use of condoms, which further exposes FSWs to  
48 HIV and other STIs. In this study there was a significant relationship between condom breakage  
49 and history of physical beating and rape. Even though there was no significant association between  
50 HIV and violence, the proportion of HIV positive FSWs in the sample was high (23%). A study  
51  
52  
53  
54  
55

1  
2  
3 conducted in Benin reported a similar finding concerning the association between condom  
4 breakage and violence, but unlike our study there was a significant association between HIV and  
5 violence experience (23). This finding indicates that solely providing condoms will not be  
6 effective to prevent HIV and other STIs transmission. Rather working on factors which contribute  
7 to not utilizing condoms properly (such as violence) could be an additional strategy for HIV  
8 prevention programs.  
9

10  
11  
12  
13  
14  
15 In general, our study demonstrates that sex workers are particularly vulnerable to physical beating  
16 and rape. Nevertheless, the harm reduction program among FSWs in Ethiopia is poor. Given the  
17 associations between violence and unprotected sex, the HIV control program may not accomplish  
18 epidemic control without also addressing violence. Therefore, combining both programs could  
19 yield better results with regard to attaining epidemic control as well as reducing the harm  
20 associated with violence. In addition, this study shows that different factors (such as sex selling  
21 venues, the age of FSWs, and level of alcohol use etc.) were associated with violence among  
22 FSWs, signifying the need of different approaches to minimize the incidence of violence (39). At  
23 the individual level, efforts to reduce violence could focus on developing educational materials  
24 and creating awareness for sex workers about their legal rights and about how to prevent, reduce  
25 and respond to violence (40). In addition, involving the community in the prevention program  
26 could play a vital role especially towards reducing stigma and discrimination towards FSWs,  
27 which in turn would create a suitable environment for FSWs to stand up for their rights.  
28 Furthermore, involving police and law enforcement authorities to reduce harassment could play a  
29 greater role in violence reduction.  
30  
31  
32  
33  
34  
35  
36  
37  
38  
39  
40

41 Finally, there were some similarities but also differences concerning the predictors of rape and  
42 physical violence. For example, being in the younger age group was a significant predictor of  
43 physical beating but not rape, and having lower income was associated with rape but not with  
44 physical beating. Nevertheless, based on the current data, it is difficult to draw any conclusions  
45 about why one variable would matter for physical beating but not for rape. The reasons underlying  
46 the differences are currently unknown, and further research might be required to gain an  
47 understanding of the patterns observed.  
48  
49  
50  
51  
52  
53  
54  
55  
56  
57  
58  
59  
60

### **Methodological considerations**

There are a limited number of studies on violence among FSWs in Ethiopia and the existing studies are restricted to one city (9, 10). One of the strengths of this study is that it involves multiple sites (eleven large towns) across the country. The second strength is the sampling technique; the study used a respondent-driven sampling, which is a strategy recommended for hard-to-reach populations and which is believed to give a representative sample of the target population. The third strength is the assessment of their HIV status on site using the national testing algorithm. In addition, the pilot study conducted prior to the actual implementation added strength for the main study protocol.

This study also had limitations. First, sexual and physical violence are sensitive topics that are subject to underreporting because of social desirability bias. Second, recall bias could have occurred because participants were asked about physical violence in the past year and rape since they started selling sex. We tried to minimize underreporting through intense interviewer training. In addition, since it was a cross-sectional study, participants were assessed only once; thus, it would be difficult to infer the temporal association between a risk factor and the outcome measures, i.e. physical violence and rape.

Furthermore, the results regarding correlates of physical and sexual violence among FSWs in Ethiopia might have limited generalizability across settings. However, these results are likely to be relevant for other FSWs in other African countries that have a similar setting as Ethiopia, and may inform targeted prevention strategies for this key population.

### **Conclusion**

In general, FSWs are vulnerable to physical and sexual violence, and the risk increases when they are younger, street-based, and are high consumers of alcohol or khat. Therefore, to reduce physical and sexual violence, strategies to secure and improve their work environment should be a critical component of targeted interventions. Increasing awareness regarding the role of khat chewing and alcohol drinking towards vulnerability to violence should be an integral component of HIV

1  
2  
3 prevention and violence reduction programs. In addition, targeted efforts should be made for the  
4 younger FSWs to reduce their vulnerability.  
5  
6

### 7 8 **Acknowledgments**

9 We would like to express gratitude to the study participants and the data collectors.  
10

11 **Conflict of Interest:** None to declare.  
12

### 13 **Authors contributions**

14 MA and AA developed the study design. MA analyzed and interpreted the data and drafted the  
15 manuscript. AA was involved in the data analysis and interpretation, and in the writing of the  
16 manuscript. TT was involved in the interpretation of the data and contributed to the writing of the  
17 manuscript. All authors approved the final manuscript.  
18  
19  
20

21 **Funding:** This research received no specific grant from any funding agency.  
22

23 **Data sharing statement:** No additional data available.  
24  
25

### 26 **Reference**

- 27  
28  
29  
30 1. Jewkes R. Intimate partner violence: causes and prevention. *The Lancet*. 2002;359(9315):1423-  
31 9.  
32  
33 2. World Health Organization, Global and regional estimates of violence against women: prevalence and health effects of intimate partner violence and non-partner sexual violence: executive  
34 summary.  
35  
36 [https://apps.who.int/iris/bitstream/handle/10665/85239/9789241564625\\_eng.pdf;jsessionid=6](https://apps.who.int/iris/bitstream/handle/10665/85239/9789241564625_eng.pdf;jsessionid=6E940F74EB1BC5204EEDE0FC6D26F358?sequence=1)  
37  
38 [E940F74EB1BC5204EEDE0FC6D26F358?sequence=1](https://apps.who.int/iris/bitstream/handle/10665/85239/9789241564625_eng.pdf;jsessionid=6E940F74EB1BC5204EEDE0FC6D26F358?sequence=1)  
39  
40  
41 3. Glasier A, Gulmezoglu AM, Schmid GP, Moreno CG, Van Look PF. Sexual and reproductive  
42 health: a matter of life and death. *The lancet*. 2006;368(9547):1595-607.  
43  
44 4. Perry A. Risk Factors of Gender-based Sexual Violence. *RTM Insights*.23.  
45  
46 [http://www.rutgerscps.org/uploads/2/7/3/7/27370595/riskfactorsofgenderbasedsexual\\_violenc](http://www.rutgerscps.org/uploads/2/7/3/7/27370595/riskfactorsofgenderbasedsexual_violence_rtminsights23.pdf)  
47 [e\\_rtminsights23.pdf](http://www.rutgerscps.org/uploads/2/7/3/7/27370595/riskfactorsofgenderbasedsexual_violence_rtminsights23.pdf)  
48  
49  
50 5. Godwin J. *Sex Work and the Law in Asia and the Pacific*. Bangkok: United Nations Develop  
51 ment Programme.  
52  
53  
54  
55

- 1  
2  
3 [http://www.undp.org/content/dam/undp/library/hiv aids/English/HIV2012SexWorkAndLaw.p](http://www.undp.org/content/dam/undp/library/hiv aids/English/HIV2012SexWorkAndLaw.pdf)  
4 [df](http://www.undp.org/content/dam/undp/library/hiv aids/English/HIV2012SexWorkAndLaw.pdf)  
5  
6  
7 6. The Criminal Code of the Federal Democratic Republic of Ethiopia Article 634:(Proclamation  
8 No. 414/2004) 2004.  
9  
10 7. World Health Organization, Addressing violence against women and achieving the Millennium  
11 Development Goals. 2005.  
12  
13 8. World Health Organization, Addressing Violence against Sex Workers 2013.  
14 [https://www.who.int/hiv/pub/sti/sex\\_worker\\_implementation/swit\\_chpt2.pdf](https://www.who.int/hiv/pub/sti/sex_worker_implementation/swit_chpt2.pdf)  
15  
16 9. Alemayehu M, Yohannes G, Damte A, Fantahun A, Gebrekirstos K, Tsegay R, et al. Prevalence  
17 and predictors of sexual violence among commercial sex workers in Northern Ethiopia.  
18 *Reproductive health*. 2015;12(1):47.  
19  
20 10. Mooney A, Kidanu A, Bradley HM, Kumoji EK, Kennedy CE, Kerrigan D. Work-related  
21 violence and inconsistent condom use with non-paying partners among female sex workers in  
22 Adama City, Ethiopia. *BMC public health*. 2013;13(1):771.  
23  
24 11. Misganaw AC, Worku YA. Assessment of sexual violence among street females in Bahir-Dar  
25 town, North West Ethiopia: a mixed method study. *BMC Public Health*.13(1):825.  
26  
27 12. Schwitters A, Swaminathan M, Serwadda D, Muyonga M, Shiraishi RW, Benech I, et al.  
28 Prevalence of rape and client-initiated gender-based violence among female sex workers:  
29 Kampala, Uganda, 2012. *AIDS and Behavior*.19(1):68-76.  
30  
31 13. Beattie TS, Bhattacharjee P, Ramesh B, Gurnani V, Anthony J, Isac S, et al. Violence against  
32 female sex workers in Karnataka state, south India: impact on health, and reductions in violence  
33 following an intervention program. *BMC Public Health*. p. 476.  
34  
35 14. Kelvin EA, Sun X, Mantell JE, Zhou J, Mao J, Peng Y. Vulnerability to sexual violence and  
36 participation in sex work among high-end entertainment centre workers in Hunan Province,  
37 China. *Sexual health*.10(5):391-9.  
38  
39 15. Wolffers I. Violence repression and other health threats. *Research for sex work*. 2001;4:1-2.  
40  
41 <https://www.nswp.org/sites/nswp.org/files/research-for-sex-work-4-english.pdf>  
42  
43 16. Hanck SE, Blankenship KM, Irwin KS, West BS, Kershaw T. Assessment of self-reported  
44 sexual behavior and condom use among female sex workers in India using a polling box  
45 approach: a preliminary report. *Sexually transmitted diseases*. 2008;35(5):489-94.  
46  
47  
48  
49  
50  
51  
52  
53  
54  
55



17. Parcesepe AM, Kelly L, Martin SL, Green S, Sinkele W, Suchindran C, et al. The impact of an alcohol harm reduction intervention on interpersonal violence and engagement in sex work among female sex workers in Mombasa, Kenya: Results from a randomized controlled trial. *Drug and alcohol dependence*.161:21-8.
18. Wechsberg WM, Luseno WK, Lam WK, Parry CD, Morojele NK. Substance use, sexual risk, and violence: HIV prevention intervention with sex workers in Pretoria. *AIDS and Behavior*. 2006;10(2):131.
19. Chersich M, Luchters S, Malonza I, Mwarogo P, King'Ola N, Temmerman M. Heavy episodic drinking among Kenyan female sex workers is associated with unsafe sex, sexual violence and sexually transmitted infections. *International journal of STD & AIDS*2007. p. 764-9.
20. Church S, Henderson M, Barnard M, Hart G. Violence by clients towards female prostitutes in different work settings: questionnaire survey. *Bmj*. 2001;322(7285):524-5.
21. El-Bassel N, Witte SS, Wada T, Gilbert L, Wallace J. Correlates of partner violence among female street-based sex workers: substance abuse, history of childhood abuse, and HIV risks. *AIDS patient care and STDs*. 2001;15(1):41-51.
22. Masvawure TB, Mantell JE, Tocco JU, Gichangi P, Restar A, Chabeda SV, et al. Intentional and unintentional condom breakage and slippage in the sexual interactions of female and male sex workers and clients in Mombasa, Kenya. *AIDS and Behavior*.22(2):637-48.
23. Tounkara FK, Diabate S, Guedou FA, Ahoussinou Cm, Kintin Fdr, Zannou DM, et al. Violence, condom breakage and HIV infection among female sex workers in Benin, West Africa. *Sexually transmitted diseases*.41(5):312.
24. Choi SY, Chen KL, Jiang ZQ. Client-perpetuated violence and condom failure among female sex workers in southwestern China. *Sex Transm Dis*2008.
25. Wilson KS, Deya R, Yuhas K, Simoni J, Vander Stoep A, Shafi J, et al. A prospective cohort study of intimate partner violence and unprotected sex in HIV-positive female sex workers in Mombasa, Kenya. *AIDS and Behavior*.20(9):2054-64.
26. Okal J, Chersich MF, Tsui S, Sutherland E, Temmerman M, Luchters S. Sexual and physical violence against female sex workers in Kenya: a qualitative enquiry. *AIDS care*.23(5):612-8.
27. Ethiopian National Key Population HIV Bio-behavioral Surveillance Round I Report. 2013
28. HIV Related Estimates and Projections for Ethiopia-2015

- 1  
2  
3 29. Decker MR, Lyons C, Billong SC, Njindam IM, Grosso A, Nunez GT, et al. Gender-based  
4 violence against female sex workers in Cameroon: prevalence and associations with sexual HIV  
5 risk and access to health services and justice. *Sex Transm Infect.*92(8):599-604.  
6  
7  
8 30. Lyons CE, Grosso A, Drame FM, Ketende S, Diouf D, Ba I, et al. Physical and Sexual Violence  
9 Affecting Female Sex Workers in Abidjan, CÔte d'Ivoire: Prevalence, and the Relationship with  
10 the Work Environment, HIV, and Access to Health Services. *JAIDS Journal of Acquired*  
11 *Immune Deficiency Syndromes.*75(1):9-17.  
12  
13 31. World Health Organization, Assessment of khat (*Catha edulis* Forsk) 34th ECDD 2006/4.4.  
14 [http://www.who.int/medicines/areas/quality\\_safety/4.4KhatCritReview.pdf](http://www.who.int/medicines/areas/quality_safety/4.4KhatCritReview.pdf).  
15  
16 32. Wilson KS, Deya R, Masese L, Simoni JM, Stoep AV, Shafi J, et al. Prevalence and correlates  
17 of intimate partner violence in HIV-positive women engaged in transactional sex in Mombasa,  
18 Kenya. *International journal of STD & AIDS.*27(13):1194-203.  
19  
20 33. Semple SJ, Stockman JK, Pitpitan EV, Strathdee SA, Chavarin CV, Mendoza DV, et al.  
21 Prevalence and correlates of client-perpetrated violence against female sex workers in 13  
22 Mexican cities. *PloS one.*10(11):e0143317.  
23  
24 34. Silverman JG. Adolescent female sex workers: invisibility, violence and HIV. *Archives of*  
25 *disease in childhood.*archdischild178715.  
26  
27 35. Sharma S, Singh S, Talukdar B. Understanding the Factors Associated with Alcohol Use among  
28 Female Sex Workers in a High HIV Prevalence Northeast State of India. *J Infec Dis Treat.*  
29 2016;2:1.  
30  
31 36. Wechsberg WM, Luseno WK, Lam W. Violence against substance-abusing South African sex  
32 workers: intersection with culture and HIV risk. *AIDS care.* 2005;17(sup1):55-64.  
33  
34 37. George WH, Stoner SA. Understanding acute alcohol effects on sexual behavior. *Annual review*  
35 *of sex research.* 2000;11(1):92-124.  
36  
37 38. Mbonye M, Rutakumwa R, Weiss H, Seeley J. Alcohol consumption and high risk sexual  
38 behaviour among female sex workers in Uganda. *African Journal of AIDS Research.*13(2):145-  
39 51.  
40  
41 39. Reed E, Gupta J, Biradavolu M, Devireddy V, Blankenship KM. The context of economic  
42 insecurity and its relation to violence and risk factors for HIV among female sex workers in  
43 Andhra Pradesh, India. *Public Health Reports.* 2010;125(4\_suppl):81-9.  
44  
45  
46  
47  
48  
49  
50  
51  
52  
53  
54  
55

- 1  
2  
3 40. Hail-Jares K, Chang RC, Choi S, Zheng H, He N, Huang ZJ. Intimate-partner and client-initiated  
4 violence among female street-based sex workers in China: does a support network help? PloS  
5 one. 2015;10(9):e0139161.  
6  
7  
8  
9  
10  
11  
12  
13  
14  
15  
16  
17  
18  
19  
20  
21  
22  
23  
24  
25  
26  
27  
28  
29  
30  
31  
32  
33  
34  
35  
36  
37  
38  
39  
40  
41  
42  
43  
44  
45  
46  
47  
48  
49  
50  
51  
52  
53  
54  
55  
56  
57  
58  
59  
60

For peer review only

# Reporting checklist for cross sectional study.

Based on the STROBE cross sectional guidelines.

## Instructions to authors

Complete this checklist by entering the page numbers from your manuscript where readers will find each of the items listed below.

Your article may not currently address all the items on the checklist. Please modify your text to include the missing information. If you are certain that an item does not apply, please write "n/a" and provide a short explanation.

Upload your completed checklist as an extra file when you submit to a journal.

In your methods section, say that you used the STROBE cross sectional reporting guidelines, and cite them as:

von Elm E, Altman DG, Egger M, Pocock SJ, Gotsche PC, Vandenbroucke JP. The Strengthening the Reporting of Observational Studies in Epidemiology (STROBE) Statement: guidelines for reporting observational studies.

|          |                     |                                                                                                 | Page   |
|----------|---------------------|-------------------------------------------------------------------------------------------------|--------|
|          |                     | Reporting Item                                                                                  | Number |
| Title    | <a href="#">#1a</a> | Indicate the study's design with a commonly used term in the title or the abstract              | 1      |
| Abstract | <a href="#">#1b</a> | Provide in the abstract an informative and balanced summary of what was done and what was found | 1      |

|    |                      |                     |                                                                   |         |
|----|----------------------|---------------------|-------------------------------------------------------------------|---------|
| 1  | Background /         | <a href="#">#2</a>  | Explain the scientific background and rationale for the           | 2       |
| 2  |                      |                     |                                                                   |         |
| 3  | rationale            |                     | investigation being reported                                      |         |
| 4  |                      |                     |                                                                   |         |
| 5  |                      |                     |                                                                   |         |
| 6  | Objectives           | <a href="#">#3</a>  | State specific objectives, including any prespecified             | 3       |
| 7  |                      |                     | hypotheses                                                        |         |
| 8  |                      |                     |                                                                   |         |
| 9  |                      |                     |                                                                   |         |
| 10 |                      |                     |                                                                   |         |
| 11 | Study design         | <a href="#">#4</a>  | Present key elements of study design early in the paper           | 4       |
| 12 |                      |                     |                                                                   |         |
| 13 |                      |                     |                                                                   |         |
| 14 |                      |                     |                                                                   |         |
| 15 | Setting              | <a href="#">#5</a>  | Describe the setting, locations, and relevant dates, including    | 4, 5, 6 |
| 16 |                      |                     | periods of recruitment, exposure, follow-up, and data collection  |         |
| 17 |                      |                     |                                                                   |         |
| 18 |                      |                     |                                                                   |         |
| 19 |                      |                     |                                                                   |         |
| 20 | Eligibility criteria | <a href="#">#6a</a> | Give the eligibility criteria, and the sources and methods of     | 5       |
| 21 |                      |                     | selection of participants.                                        |         |
| 22 |                      |                     |                                                                   |         |
| 23 |                      |                     |                                                                   |         |
| 24 |                      |                     |                                                                   |         |
| 25 |                      |                     |                                                                   |         |
| 26 |                      | <a href="#">#7</a>  | Clearly define all outcomes, exposures, predictors, potential     | 6       |
| 27 |                      |                     | confounders, and effect modifiers. Give diagnostic criteria, if   |         |
| 28 |                      |                     | applicable                                                        |         |
| 29 |                      |                     |                                                                   |         |
| 30 |                      |                     |                                                                   |         |
| 31 |                      |                     |                                                                   |         |
| 32 |                      |                     |                                                                   |         |
| 33 | Data sources /       | <a href="#">#8</a>  | For each variable of interest give sources of data and details of | 6       |
| 34 | measurement          |                     | methods of assessment (measurement). Describe                     |         |
| 35 |                      |                     | comparability of assessment methods if there is more than one     |         |
| 36 |                      |                     | group. Give information separately for for exposed and            |         |
| 37 |                      |                     | unexposed groups if applicable.                                   |         |
| 38 |                      |                     |                                                                   |         |
| 39 |                      |                     |                                                                   |         |
| 40 |                      |                     |                                                                   |         |
| 41 |                      |                     |                                                                   |         |
| 42 |                      |                     |                                                                   |         |
| 43 |                      |                     |                                                                   |         |
| 44 |                      |                     |                                                                   |         |
| 45 | Bias                 | <a href="#">#9</a>  | Describe any efforts to address potential sources of bias         | 2, 18   |
| 46 |                      |                     |                                                                   |         |
| 47 |                      |                     |                                                                   |         |
| 48 | Study size           | <a href="#">#10</a> | Explain how the study size was arrived at                         | 5       |
| 49 |                      |                     |                                                                   |         |
| 50 |                      |                     |                                                                   |         |
| 51 | Quantitative         | <a href="#">#11</a> | Explain how quantitative variables were handled in the            | 6       |
| 52 | variables            |                     | analyses. If applicable, describe which groupings were chosen,    |         |
| 53 |                      |                     | and why                                                           |         |
| 54 |                      |                     |                                                                   |         |
| 55 |                      |                     |                                                                   |         |
| 56 |                      |                     |                                                                   |         |
| 57 |                      |                     |                                                                   |         |
| 58 |                      |                     |                                                                   |         |
| 59 |                      |                     |                                                                   |         |
| 60 |                      |                     |                                                                   |         |

|    |                     |                      |                                                                                                                                                                                                                                                                                |                |  |
|----|---------------------|----------------------|--------------------------------------------------------------------------------------------------------------------------------------------------------------------------------------------------------------------------------------------------------------------------------|----------------|--|
| 1  | Statistical methods | <a href="#">#12a</a> | Describe all statistical methods, including those used to control for confounding                                                                                                                                                                                              | 7              |  |
| 2  |                     |                      |                                                                                                                                                                                                                                                                                |                |  |
| 3  |                     |                      |                                                                                                                                                                                                                                                                                |                |  |
| 4  |                     |                      |                                                                                                                                                                                                                                                                                |                |  |
| 5  |                     |                      |                                                                                                                                                                                                                                                                                |                |  |
| 6  |                     |                      |                                                                                                                                                                                                                                                                                |                |  |
| 7  |                     | <a href="#">#12b</a> | Describe any methods used to examine subgroups and interactions                                                                                                                                                                                                                | NA             |  |
| 8  |                     |                      |                                                                                                                                                                                                                                                                                |                |  |
| 9  |                     |                      |                                                                                                                                                                                                                                                                                |                |  |
| 10 |                     |                      |                                                                                                                                                                                                                                                                                |                |  |
| 11 |                     |                      |                                                                                                                                                                                                                                                                                |                |  |
| 12 |                     | <a href="#">#12c</a> | Explain how missing data were addressed                                                                                                                                                                                                                                        | 8              |  |
| 13 |                     |                      |                                                                                                                                                                                                                                                                                |                |  |
| 14 |                     |                      |                                                                                                                                                                                                                                                                                |                |  |
| 15 |                     | <a href="#">#12d</a> | If applicable, describe analytical methods taking account of sampling strategy                                                                                                                                                                                                 | NA             |  |
| 16 |                     |                      |                                                                                                                                                                                                                                                                                |                |  |
| 17 |                     |                      |                                                                                                                                                                                                                                                                                |                |  |
| 18 |                     |                      |                                                                                                                                                                                                                                                                                |                |  |
| 19 |                     |                      |                                                                                                                                                                                                                                                                                |                |  |
| 20 |                     |                      |                                                                                                                                                                                                                                                                                |                |  |
| 21 |                     | <a href="#">#12e</a> | Describe any sensitivity analyses                                                                                                                                                                                                                                              | 7              |  |
| 22 |                     |                      |                                                                                                                                                                                                                                                                                |                |  |
| 23 | Participants        | <a href="#">#13a</a> | Report numbers of individuals at each stage of study—eg numbers potentially eligible, examined for eligibility, confirmed eligible, included in the study, completing follow-up, and analysed. Give information separately for for exposed and unexposed groups if applicable. | 5              |  |
| 24 |                     |                      |                                                                                                                                                                                                                                                                                |                |  |
| 25 |                     |                      |                                                                                                                                                                                                                                                                                |                |  |
| 26 |                     |                      |                                                                                                                                                                                                                                                                                |                |  |
| 27 |                     |                      |                                                                                                                                                                                                                                                                                |                |  |
| 28 |                     |                      |                                                                                                                                                                                                                                                                                |                |  |
| 29 |                     |                      |                                                                                                                                                                                                                                                                                |                |  |
| 30 |                     |                      |                                                                                                                                                                                                                                                                                |                |  |
| 31 |                     |                      |                                                                                                                                                                                                                                                                                |                |  |
| 32 |                     |                      |                                                                                                                                                                                                                                                                                |                |  |
| 33 |                     |                      |                                                                                                                                                                                                                                                                                |                |  |
| 34 |                     |                      |                                                                                                                                                                                                                                                                                |                |  |
| 35 |                     |                      |                                                                                                                                                                                                                                                                                |                |  |
| 36 |                     | <a href="#">#13b</a> | Give reasons for non-participation at each stage                                                                                                                                                                                                                               | 5              |  |
| 37 |                     |                      |                                                                                                                                                                                                                                                                                |                |  |
| 38 |                     |                      |                                                                                                                                                                                                                                                                                |                |  |
| 39 |                     | <a href="#">#13c</a> | Consider use of a flow diagram                                                                                                                                                                                                                                                 |                |  |
| 40 |                     |                      |                                                                                                                                                                                                                                                                                |                |  |
| 41 | Descriptive data    | <a href="#">#14a</a> | Give characteristics of study participants (eg demographic, clinical, social) and information on exposures and potential confounders. Give information separately for exposed and unexposed groups if applicable.                                                              |                |  |
| 42 |                     |                      |                                                                                                                                                                                                                                                                                |                |  |
| 43 |                     |                      |                                                                                                                                                                                                                                                                                |                |  |
| 44 |                     |                      |                                                                                                                                                                                                                                                                                |                |  |
| 45 |                     |                      |                                                                                                                                                                                                                                                                                |                |  |
| 46 |                     |                      |                                                                                                                                                                                                                                                                                |                |  |
| 47 |                     |                      |                                                                                                                                                                                                                                                                                |                |  |
| 48 |                     |                      |                                                                                                                                                                                                                                                                                |                |  |
| 49 |                     |                      |                                                                                                                                                                                                                                                                                |                |  |
| 50 |                     |                      |                                                                                                                                                                                                                                                                                |                |  |
| 51 |                     |                      |                                                                                                                                                                                                                                                                                |                |  |
| 52 |                     | <a href="#">#14b</a> | Indicate number of participants with missing data for each variable of interest                                                                                                                                                                                                | 8, 9 in tables |  |
| 53 |                     |                      |                                                                                                                                                                                                                                                                                |                |  |
| 54 |                     |                      |                                                                                                                                                                                                                                                                                |                |  |
| 55 |                     |                      |                                                                                                                                                                                                                                                                                |                |  |
| 56 |                     |                      |                                                                                                                                                                                                                                                                                |                |  |
| 57 | Outcome data        | <a href="#">#15</a>  | Report numbers of outcome events or summary measures.                                                                                                                                                                                                                          | na             |  |
| 58 |                     |                      |                                                                                                                                                                                                                                                                                |                |  |
| 59 |                     |                      |                                                                                                                                                                                                                                                                                |                |  |
| 60 |                     |                      |                                                                                                                                                                                                                                                                                |                |  |

|    |                  |                                                                                        |        |
|----|------------------|----------------------------------------------------------------------------------------|--------|
| 1  |                  | Give information separately for exposed and unexposed                                  |        |
| 2  |                  | groups if applicable.                                                                  |        |
| 3  |                  |                                                                                        |        |
| 4  |                  |                                                                                        |        |
| 5  |                  |                                                                                        |        |
| 6  | Main results     | <a href="#">#16a</a> Give unadjusted estimates and, if applicable, confounder-         | 7 - 10 |
| 7  |                  | adjusted estimates and their precision (eg, 95% confidence                             |        |
| 8  |                  | interval). Make clear which confounders were adjusted for and                          |        |
| 9  |                  | why they were included                                                                 |        |
| 10 |                  |                                                                                        |        |
| 11 |                  |                                                                                        |        |
| 12 |                  |                                                                                        |        |
| 13 |                  |                                                                                        |        |
| 14 |                  |                                                                                        |        |
| 15 |                  |                                                                                        |        |
| 16 |                  | <a href="#">#16b</a> Report category boundaries when continuous variables were         |        |
| 17 |                  | categorized                                                                            |        |
| 18 |                  |                                                                                        |        |
| 19 |                  |                                                                                        |        |
| 20 |                  |                                                                                        |        |
| 21 |                  | <a href="#">#16c</a> If relevant, consider translating estimates of relative risk into |        |
| 22 |                  | absolute risk for a meaningful time period                                             |        |
| 23 |                  |                                                                                        |        |
| 24 |                  |                                                                                        |        |
| 25 |                  |                                                                                        |        |
| 26 | Other analyses   | <a href="#">#17</a> Report other analyses done—e.g., analyses of subgroups and         | 10 -16 |
| 27 |                  | interactions, and sensitivity analyses                                                 |        |
| 28 |                  |                                                                                        |        |
| 29 |                  |                                                                                        |        |
| 30 |                  |                                                                                        |        |
| 31 |                  |                                                                                        |        |
| 32 | Key results      | <a href="#">#18</a> Summarise key results with reference to study objectives           |        |
| 33 |                  |                                                                                        |        |
| 34 |                  |                                                                                        |        |
| 35 | Limitations      | <a href="#">#19</a> Discuss limitations of the study, taking into account sources of   | 18     |
| 36 |                  | potential bias or imprecision. Discuss both direction and                              |        |
| 37 |                  | magnitude of any potential bias.                                                       |        |
| 38 |                  |                                                                                        |        |
| 39 |                  |                                                                                        |        |
| 40 |                  |                                                                                        |        |
| 41 |                  |                                                                                        |        |
| 42 | Interpretation   | <a href="#">#20</a> Give a cautious overall interpretation considering objectives,     | 16 -18 |
| 43 |                  | limitations, multiplicity of analyses, results from similar studies,                   |        |
| 44 |                  | and other relevant evidence.                                                           |        |
| 45 |                  |                                                                                        |        |
| 46 |                  |                                                                                        |        |
| 47 |                  |                                                                                        |        |
| 48 |                  |                                                                                        |        |
| 49 |                  |                                                                                        |        |
| 50 | Generalisability | <a href="#">#21</a> Discuss the generalisability (external validity) of the study      | 19     |
| 51 |                  | results                                                                                |        |
| 52 |                  |                                                                                        |        |
| 53 |                  |                                                                                        |        |
| 54 |                  |                                                                                        |        |
| 55 | Funding          | <a href="#">#22</a> Give the source of funding and the role of the funders for the     | 20     |
| 56 |                  | present study and, if applicable, for the original study on which                      |        |
| 57 |                  |                                                                                        |        |
| 58 |                  |                                                                                        |        |
| 59 |                  |                                                                                        |        |
| 60 |                  |                                                                                        |        |

1 the present article is based

2  
3  
4 The STROBE checklist is distributed under the terms of the Creative Commons Attribution License  
5  
6 CC-BY. This checklist can be completed online using <https://www.goodreports.org/>, a tool made by  
7  
8 the [EQUATOR Network](#) in collaboration with [Penelope.ai](#)  
9  
10  
11  
12  
13  
14  
15  
16  
17  
18  
19  
20  
21  
22  
23  
24  
25  
26  
27  
28  
29  
30  
31  
32  
33  
34  
35  
36  
37  
38  
39  
40  
41  
42  
43  
44  
45  
46  
47  
48  
49  
50  
51  
52  
53  
54  
55  
56  
57  
58  
59  
60



# BMJ Open

## Prevalence and correlates of physical violence and rape among female sex workers in Ethiopia: A cross-sectional study with respondent-driven sampling from 11 major towns

|                                 |                                                                                                                                                                                                                                       |
|---------------------------------|---------------------------------------------------------------------------------------------------------------------------------------------------------------------------------------------------------------------------------------|
| Journal:                        | <i>BMJ Open</i>                                                                                                                                                                                                                       |
| Manuscript ID                   | bmjopen-2018-028247.R3                                                                                                                                                                                                                |
| Article Type:                   | Research                                                                                                                                                                                                                              |
| Date Submitted by the Author:   | 02-Jul-2019                                                                                                                                                                                                                           |
| Complete List of Authors:       | Amogne, Minilik; Lunds Universitet, social medicin and global health; Ethiopian Public Health Institute, TB/HIV Department<br>Balcha, Taye; Armauer Hansen Research Institute<br>Agardh, Anette; Lunds University Faculty of Medicine |
| <b>Primary Subject Heading</b>: | Public health                                                                                                                                                                                                                         |
| Secondary Subject Heading:      | Public health, Sexual health, HIV/AIDS, Epidemiology                                                                                                                                                                                  |
| Keywords:                       | female sex workers, physical violence, rape, Substance use, Ethiopia                                                                                                                                                                  |
|                                 |                                                                                                                                                                                                                                       |

SCHOLARONE™  
Manuscripts

1  
2  
3 **Prevalence and correlates of physical violence and rape among female sex workers in**  
4 **Ethiopia: A cross-sectional study with respondent-driven sampling from 11 major towns**

5 Minilik Demissie<sup>1,2</sup>, Taya Tolera Balcha<sup>3</sup>, Anette Agardh<sup>1</sup>  
6  
7  
8  
9

10 Author affiliation

- 11  
12 1. Social Medicine and Global Health, Department of Clinical Sciences, Malmo, Lund  
13 University, Malmo, Sweden  
14  
15 2. Ethiopian Public Health Institute, Addis Ababa, Ethiopia  
16  
17 3. Armauer Hansen Research Institute, Addis Ababa, Ethiopia  
18  
19

20 Corresponding author

21 Minilik Demissie Amogne, minilik.demissie@med.lu.se  
22  
23  
24  
25  
26

27 **Abstract**

28 **Objective:** This study examined the prevalence and correlates of physical violence and rape  
29 among FSWs in Ethiopia.  
30

31 **Design:** A cross-sectional study using respondent-driven sampling technique  
32

33 **Setting:** Eleven major towns in Ethiopia  
34

35 **Participants:** 4900 female sex workers (FSWs)  
36

37 **Main outcome measures:** The prevalence of experiences of physical beating and rape  
38

39 **Results:** Among FSWs, 17.5% reported physical beating within the past year and 15.2% reported  
40 rape since they started selling sex. FSWs aged 35+ years (AOR 0.59, 95% CI 0.38, 0.92) were less  
41 exposed to physical beating than those aged 15-24 years. FSWs working on the street (AOR 1.92,  
42 95% CI 1.53, 2.39), in red-light houses (AOR 1.63, 95% CI 1.12, 2.38), and in local drinking  
43 houses (AOR 1.35, 95% CI 1.02, 1.78) experienced more physical beating than FSWs working in  
44 bars/hotels. FSWs who consumed alcohol four or more days in a week (AOR 1.92, 95% CI 1.21,  
45 3.04), and who chewed khat frequently experienced more physical violence. Rape was associated  
46 with having a low monthly income, drinking alcohol four or more days per week (AOR 2.33, 95%  
47 CI 1.47, 3.7), experience of heavy episodic drinking in a month (AOR 1.71, 95% CI 1.24, 2.38),  
48 and chewing khat 3-4 days per week (AOR 2.15, 95% CI 1.55, 2.98). Condom breakage was more  
49  
50  
51  
52  
53  
54  
55

1  
2  
3 frequent among FSWs who reported both physical beating (AOR 1.51, 95% CI 1.25, 1.84) and rape  
4 (AOR 1.26, 95% CI 1.03, 1.55).

5  
6 **Conclusion:** FSWs in Ethiopia are vulnerable to physical and sexual violence, and the risk  
7 increases when they are younger, street-based, and high consumers of alcohol or khat. Therefore,  
8 targeted efforts are needed for prevention and harm reduction.  
9

10  
11  
12 **Keywords:** female sex workers, physical violence, rape, substance use, Ethiopia  
13

### 14 15 **Strengths and limitations of this study**

- 16 • The study involves multiple sites (eleven large towns) across the country with a large  
17 sample size.
- 18 • The study used a respondent-driven sampling, a technique that is recommended for hard to  
19 reach populations.
- 20 • Sexual and physical violence are sensitive topics that are subject to underreporting because  
21 of social desirability bias.
- 22 • Recall bias could have occurred because participants were asked about physical violence  
23 in the past year and rape since they started selling sex.
- 24 • Due to a cross-sectional study design, the influence of alcohol use/khat chewing must be  
25 interpreted with caution, since the participants' current consumption status might not be an  
26 accurate indicator of the consumption status at the time of the violence.  
27  
28  
29  
30  
31  
32  
33  
34  
35  
36  
37  
38  
39  
40  
41  
42  
43  
44  
45  
46  
47  
48  
49  
50  
51  
52  
53  
54  
55  
56  
57  
58  
59  
60

## Introduction

As per WHO definition, violence is the intentional use of physical force or power against another person or group, which has a high likelihood of resulting in injury, death, or sexual or psychological harm (1). Violence against women is a global phenomenon, as more than one in three women worldwide is beaten, coerced into sex, or abused in her lifetime (2). Furthermore, violence is one of the main contributors to poor sexual and reproductive health among women, leading to unintended pregnancy, self-induced abortions, gynecologic problems, sexual dysfunction, and sexually transmitted infections (STIs), including HIV (3, 4).

In most countries, female sex work is either illegal or has an uncertain legal status. For example, prostitution is not illegal but approaching sex workers in public is illegal; this makes authorities reluctant to offer protection or support, which in turn legitimizes violence and discrimination against sex workers (5). In the case of Ethiopia, it is illegal to operate a brothel or procure sex workers as a commercial activity, but the sale of sex by women is neither prohibited nor legally recognized as a profession (6). Female sex workers (FSWs) frequently face harassment and violence, not only because of their illegitimate status, but also as a manifestation of gender inequality and discrimination directed towards women (7, 8).

Violence against FSWs can be perpetrated by anyone, including police officers, intimate partners, and clients. In Adama and Mekelle towns in Ethiopia, nearly 60% and 75% of female sex workers, respectively, reported lifetime violence (9, 10). In the same study in Adama, 8% of FSW reported forced sex since they started sex work (10). In another study conducted among homeless street females in Bahirdar town, 11.4% of them reported having been raped during the last one year period (11). In Uganda, 40% of FSWs reported physical abuse, and 49 % had been raped at least once in their lifetime (12). In another study conducted in Hunan, China and Karnataka, India, 16% and 9% of female sex workers, respectively, reported work-related violence (13, 14).

Several risk factors have been found to have an association with physical and sexual violence against FSWs. Socio-economic characteristics, risky sexual behaviors and substance abuse are the most mentioned factors worldwide (9, 10, 15, 16). A randomized controlled trial study in Kenya and South Africa showed that alcohol consumption reduction by FSWs had a significant

1  
2  
3 contribution to violence reduction (17, 18). Moreover, establishments where alcohol and other  
4 drugs are consumed are associated with an increased likelihood of people becoming violent  
5 towards sex workers (8, 19). However, other studies suggest that FSWs who work outdoors face  
6 more violence than those who work indoors (20, 21).  
7  
8  
9

10  
11 Violence towards FSWs may also be associated with condom use and condom breakage. Studies  
12 conducted among FSWs have found several intentional and unintentional factors associated with  
13 condom breakage during sex work. These factors included being drunk or high on drugs, wearing  
14 unfitting condoms, incorrect condom use, and having violent or rough sex (22, 23). Moreover,  
15 violence towards FSWs may also be linked to disagreement over condom use, which increases the  
16 risk of acquiring HIV and other STIs (21, 24-26). In Ethiopia, the weighted HIV prevalence among  
17 FSWs is estimated to be 23% (27), while it is 1.2 % in the general population (28), which shows  
18 the magnitude of the potential risk exposure among FSWs. In addition, violence also prevents sex  
19 workers from seeking appropriate health services (26, 29, 30).  
20  
21  
22  
23  
24  
25  
26

27 In general, 120,000 to 160,000 FSWs are estimated to live in Ethiopia, working in different venues,  
28 mainly in bars and hotels, Key-mebrat (red lighthouses), local drinking houses, and on the street  
29 (27). Currently, the number of female sex workers is growing, with increasing numbers of young  
30 girls entering the sex trade.  
31  
32  
33  
34

35 This study explores the prevalence and correlates of physical violence and rape among FSWs in  
36 Ethiopia. Successful strategies for handling the trauma may vary by the type of violence  
37 experienced. Therefore, identification of risk factors that are specific to various types of violence  
38 has the potential to inform the development of evidence-based prevention programs. In addition,  
39 generating such types of evidence based on national level data will help to promote effective  
40 prevention for female sex workers.  
41  
42  
43  
44  
45  
46  
47  
48  
49  
50  
51  
52  
53  
54  
55  
56  
57  
58  
59  
60

## Methods

### Study design

This study was part of a larger study concerning HIV prevalence and related risk factors among female sex workers and long-distance drivers that was carried out in Ethiopia in 2014. A cross-sectional study design using Respondent Driven Sampling technique (RDS) was used for data collection. RDS is a complex sampling method based on a chain-referral design and recommended for hard-to-reach populations. At all data collection sites, initial FSW “seeds” were selected to start the sampling process. Seeds were selected purposively to represent the type of sex worker, age category, and geographic location. They were identified through formative assessments with key stakeholders working with FSWs and representatives of FSWs. The selected seeds were those who were well-connected with their community and reported large social networks.

A maximum of three recruits per seed was allowed and only one-time participation was ensured by using a fingerprint-scanning device. Recruitment pattern (who recruited whom) was tracked and network size was determined.

### Study area, period and population

The study locations were the seven major regional towns and the four main transport corridor towns. The seven major regional towns were: Addis Ababa, Bahirdar, Mekelle, Hawassa, Adama, Gambela, and Dire-dawa. The four transport corridor towns were Semera-Logia (Addis Ababa-Djibouti route), Kombolcha (Addis Ababa-Mekelle route), Metema (Addis Ababa-Metema route), and Shashemene (Addis Ababa - Moyale route).

The source populations were all female sex workers living in those selected eleven towns. For the purpose of the study, female sex workers were defined as follows: ‘women who practice sexual activity with the pre-conditions of financial or in-kind benefits’. The inclusion criteria were: receiving money or other benefits for sex with four or more people within the last 30 days, being 15 and above years old, properly recruited by a peer (presenting with the coupon), and giving consent both for the interview and blood drawing.

### Sample size

The source study protocol calculated that a sample size of 400 female sex workers was needed in each town using anticipated HIV prevalence of 25%, 6% precision, 95% CI, and design effect of two. However, the number of female sex workers who participated in each town was not exactly 400, and the total number of FSWs who participated in the study was 4900.

### Data collection procedure

Six seed FSWs were selected to initiate coupon-based recruitment. Eligible FSWs who provided informed consent to participate were administered a face to face interview in a private room by a nurse with a structured questionnaire in Amharic language. They then provided blood specimens for HIV, CD4, and viral load testing in a private room. When the process was completed, participants were provided with up to three coupons and instructed to recruit their FSW peers into the study. To compensate the time and costs of transport, a primary incentive of 100 ETB (\$5.0) and additional 50 ETB (\$2.5) for each eligible peer she enrolled into the study was given. An electronic data base for tracking coupons and recruitment was established with participant ID, fingerprint code, and a pre-printed label that was scanned. The data collection tools and questionnaire were pretested in a pilot study; feedback from the pilot study was used to finalize the data collection tools and field logistic and operational procedures. The questionnaire included: socio-demographic characteristics, sexual risk exposure, sexual behaviors, condom use, history of STI symptoms, alcohol and drug use consumption, violence related issues, knowledge of HIV transmission, and HIV testing history.

### Variables

Violence was assessed with two dependent variables, which were physical beating during the last one year and rape since sex selling started. The following questions were asked: “When exchanging sex for money during the last one year, have you ever been physically beaten by a sexual partner or client?” and “Have you ever been raped or forced to have sex against your will since you start selling sex?”. Responses were dichotomized into a Yes and No variable for analysis. For both of the questions, all who had reported beating and rape at least once were considered as having experienced violence (Yes).

1  
2  
3 The different time periods used to assess experiences of physical beating and rape were based on  
4 the presumed frequency of the two different types of violence. Physical beating might occur more  
5 frequently, while rape presumably occurs less frequently. Therefore, to measure the general burden  
6 of the two experiences, we specifically selected the time period that might be appropriate for the  
7 recall of the particular experience.  
8  
9  
10

11  
12 The independent measures included current age, monthly income from selling sex, marital status,  
13 educational status, sex selling venue, khat chewing, alcohol drinking, HIV status, and condom  
14 breakage.  
15  
16

17  
18 Current age was a continuous variable and for the purpose of analysis categorized as ten-year  
19 intervals: younger (15-24), middle age (25-34), and older one (35+), with the younger age group  
20 used as the reference category. Monthly income from selling sex was an open-ended question and  
21 for the analysis was categorized into 1000 birr (\$50) intervals considering the cost of living in the  
22 country. Educational status was categorized as no formal education, primary first cycle (grade 1-  
23 4), primary second cycle (grade 5-8), and secondary and above for analysis, in accordance with  
24 the country education system.  
25  
26  
27  
28  
29

30  
31 In addition, sex workers were categorized based on their sex-selling venue, where bar/hotel was  
32 used as the reference because it is the most common FSW working venue. In addition, this venue  
33 category has better security than the other venues, and there were greater numbers of FSWs in this  
34 category.  
35  
36

37  
38 Alcohol consumption was measured by different indicators, including frequency of alcohol  
39 consumption, number of drinks per specific day and frequency of heavy episodic drinking (6 or  
40 more standard drinks per day).  
41  
42

43  
44 Frequency of khat chewing was assessed according to the number of days that they chewed in a  
45 week. Khat (*Catha edulis*) is a stimulant leaf, and after chewing khat, an individual may become  
46 talkative, alert, feel excitement, increased self-esteem, and increased imagination (31). Khat  
47 chewing is also popular among FSWs, as it is a means to spend the daytime, to be active during  
48 the night for sex work, and to socialize with each other.  
49  
50  
51  
52  
53  
54



### **Data analysis**

Statistical analysis was performed using SPSS Version 20. Descriptive statistics were used to provide summary measures (means, frequencies). Odds ratios (crude and adjusted) and 95% confidence intervals (CI) were obtained using bivariate and multivariate logistic regression analysis. Those independent variables significantly associated with the outcome variable in the bivariate analysis were included in the multivariate analysis. In addition, correlation analysis was performed to examine potential multicollinearity; no correlation was found between the variables. Cases with missing data were excluded from the analyses. Significance was accepted at p-value <0.05.

During data collection, we did not specifically assess where FSWs experienced the violence (in the current town or in another town). Because FSWs are highly mobile from one town to another, it would be inaccurate to assume that their experiences of violence occurred in the town from which they were sampled. Therefore, during analysis, we did not conduct any statistical analysis that assessed the contribution of the sampling site (participant's town) to the experience of violence.

### **Ethical considerations**

Permission for data use was obtained from the Ethiopian Public Health Institute (EPHI). The protocol was cleared at the Scientific and Ethical Research Office (SERO) of EPHI, the Ethiopian Science and Technology Ministry Ethical Committee, and CDC-Atlanta IRB. Individual written informed consent was obtained from each participant for the interview and blood sample collection while the study was conducted.

### **Patient and Public Involvement**

During the design or implementation of the study, no patients were involved in the development of the research question and outcome measures. Nevertheless, due to the nature of the respondent driven sampling methodology, an assessment was conducted to identify seeds and hotspot areas for the actual data collection. This assessment was conducted in collaboration with organizations working with FSWs and an active member of FSWs in those organizations. The primary results will be disseminate by publication in peer-reviewed journals and presented at the national level for stakeholders working with FSWs.

## Results

### Socio-demographic and other background characteristics

A total of 4900 female sex workers participated in the study. Demographic, socioeconomic, and other background characteristics of the participants are shown in Table 1. The majority of the participants were between 15 to 24 years old with a mean age of 24 years (SD= 5.7); 44 % of them were divorced, separated or widowed. A quarter of them reported being uneducated and 40% of them earned on average less than \$50 per month. Regarding sex selling starting age, the majority started selling sex between the ages of 18-24 years, although nearly 25% started before the age of 18. FSWs work in different eating, drinking and recreation establishments, as well as other venues; 33% recruited their clients in bars/hotels, followed by 26.5% on the street, and 20% in local drinking houses (Table 1).

**Table 1. Distribution of socio-demographic and other background characteristics among 4900 female sex workers across eleven towns, Ethiopia**

| Variable                        | Frequency | Percentage |
|---------------------------------|-----------|------------|
| <b>Age</b>                      |           |            |
| 15 - 24                         | 2831      | 57.8       |
| 25 - 34                         | 1700      | 34.7       |
| 35+                             | 369       | 7.5        |
| Total                           | 4900      | 100.0      |
| Missing                         | 0         |            |
| Mean age of respondents = 24.16 |           |            |
| SD= 5.7                         |           |            |
| <b>Educational status</b>       |           |            |
| No Education                    | 1224      | 25.0       |
| Primary 1st cycle (1 - 4)       | 764       | 16.0       |
| Primary 2nd cycle (5 - 8)       | 2062      | 42.0       |
| Secondary & above               | 831       | 17.0       |
| Total                           | 4881      | 100.0      |

|                                        |      |       |
|----------------------------------------|------|-------|
| Missing                                | 19   |       |
| <b>Sex selling venues</b>              |      |       |
| Bar/Hotel                              | 1613 | 33.0  |
| Local drinking houses                  | 983  | 20.1  |
| Spa/Massage/Beauty salon/Own house     | 261  | 5.3   |
| Red-light houses                       | 429  | 8.8   |
| Street                                 | 1295 | 26.5  |
| Other                                  | 304  | 6.2   |
| Total                                  | 4885 | 100.0 |
| Missing                                | 15   |       |
| <b>Current marital status</b>          |      |       |
| Never Married                          | 2698 | 55.2  |
| Married/Cohabited                      | 37   | 0.8   |
| Separated/Divorced                     | 1976 | 40.5  |
| Widowed                                | 173  | 3.5   |
| Total                                  | 4884 | 100.0 |
| Missing                                | 16   |       |
| <b>Sex selling starting age</b>        |      |       |
| Less than 15                           | 120  | 2.5   |
| 15 - 17                                | 1088 | 22.3  |
| 18 - 24                                | 2864 | 58.7  |
| 25 - 29                                | 583  | 12.0  |
| 30 & above                             | 220  | 4.5   |
| Total                                  | 4875 | 100.0 |
| Missing                                | 25   |       |
| <b>Monthly income from selling sex</b> |      |       |
| Less than 1000 (<\$50)                 | 1932 | 39.6  |
| 1001 - 2000 (\$50 - \$100)             | 1554 | 31.8  |
| 2001 - 3000 (\$100 - \$150)            | 812  | 16.6  |
| 3001 - 4000 (\$150 - \$200)            | 318  | 6.5   |

|                             |      |       |
|-----------------------------|------|-------|
| 4001 - 5000 (\$200 - \$250) | 150  | 3.1   |
| Above 5000 (>\$250)         | 117  | 2.4   |
| Total                       | 4883 | 100.0 |
| Missing                     | 17   |       |

### Behavioral and other related factors

Table 2 shows the prevalence of behavioral and other factors. The majority (70%) of the respondents consumed alcohol, and of those, 15.8% had drunk so much on a typical day within the past 30 days that they did not remember what happened the next day. About half of the respondents chewed khat, and 23.8% of them chewed almost every day (5-7 days a week).

Regarding condom use, 25.5% of them reported condom breakage within the past 30 days prior to the study. HIV/AIDS status of the respondents was also assessed and a quarter of them (23%) were HIV positive. With regard to physical and sexual violence experience, 17.5% of them reported physical beating within the past 12 months and 15.2% reported having been raped since they started selling sex. (Table 2)

**Table 2. Behavioral and other related factors among 4900 female sex workers across eleven towns, Ethiopia**

| Variable                             | Frequency | Percentage |
|--------------------------------------|-----------|------------|
| <b>Frequency alcohol consumption</b> |           |            |
| Never                                | 1493      | 30.6       |
| Once a month or less                 | 222       | 4.5        |
| 2 - 4 days a month                   | 492       | 10.1       |
| 2 - 3 days a week                    | 1394      | 28.5       |
| 4 or more days a week                | 1283      | 26.3       |
| Total                                | 4884      | 100.0      |
| Missing                              | 16        |            |

### Alcohol containing drinks on a typical day

1  
2  
3  
4  
5  
6  
7  
8  
9  
10  
11  
12  
13  
14  
15  
16  
17  
18  
19  
20  
21  
22  
23  
24  
25  
26  
27  
28  
29  
30  
31  
32  
33  
34  
35  
36  
37  
38  
39  
40  
41  
42  
43  
44  
45  
46  
47  
48  
49  
50  
51  
52  
53  
54  
55  
56  
57  
58  
59  
60

|            |      |       |
|------------|------|-------|
| 1 or 2     | 806  | 23.8  |
| 3 or 4     | 1383 | 40.8  |
| 5 or 6     | 742  | 21.9  |
| 7 to 9     | 296  | 8.7   |
| 10 or more | 164  | 4.8   |
| Total      | 3391 | 100.0 |
| Missing    | 0    |       |

### Frequency of heavy episodic drinking

|                       |      |       |
|-----------------------|------|-------|
| Never                 | 1863 | 54.9  |
| Less than monthly     | 236  | 7.0   |
| Monthly               | 299  | 8.8   |
| Weekly                | 630  | 18.6  |
| Daily or almost daily | 363  | 10.7  |
| Total                 | 3391 | 100.0 |
| Missing               | 0    |       |

### Drunk so much and can't remember

#### what happened the next day

|                          |      |       |
|--------------------------|------|-------|
| Yes, in last 30 days     | 534  | 15.8  |
| Yes, not in last 30 days | 233  | 6.9   |
| No                       | 2609 | 77.2  |
| Don't remember           | 4    | 0.1   |
| Total                    | 3380 | 100.0 |
| Missing                  | 11   |       |

### Frequency of khat chewing

|                       |      |       |
|-----------------------|------|-------|
| Never                 | 2431 | 49.8  |
| Less than once a week | 577  | 11.8  |
| 1 - 2 days per week   | 429  | 8.8   |
| 3 - 4 days per week   | 284  | 5.8   |
| 5 - 7 days per week   | 1162 | 23.8  |
| Total                 | 4883 | 100.0 |

|                                                                      |      |       |
|----------------------------------------------------------------------|------|-------|
| Missing                                                              | 17   |       |
| <b>Condom breakage in the past 30 days</b>                           |      |       |
| Yes                                                                  | 1243 | 25.5  |
| No                                                                   | 3635 | 74.5  |
| Total                                                                | 4878 |       |
| Missing                                                              | 22   |       |
| <b>HIV status</b>                                                    |      |       |
| Negative                                                             | 3708 | 76.0  |
| Positive                                                             | 1173 | 24.0  |
| Total                                                                | 4881 | 100.0 |
| Missing                                                              | 19   |       |
| <b>Ever been raped or forced to have sex since start selling sex</b> |      |       |
| No                                                                   | 4142 | 84.8  |
| Yes                                                                  | 742  | 15.2  |
| Total                                                                | 4884 | 100.0 |
| Missing                                                              | 16   |       |
| <b>Physically beaten in the last 12 months</b>                       |      |       |
| No                                                                   | 4026 | 82.5  |
| Yes                                                                  | 855  | 17.5  |
| Total                                                                | 4881 | 100.0 |
| Missing                                                              | 19   |       |

### Bivariate regression analysis outcome

Table 3 shows the bivariate logistic regression results; each independent variable was analyzed separately against the two outcome variables. The variables that were significantly associated with physical violence were: age, educational level, average monthly income from selling sex, current marital status, sex selling venues, frequency of alcohol consumption, alcohol containing drinks on a typical day, frequency of heavy episodic drinking, frequency of khat chewing in a week, and

condom breakage. Variables significantly associated with rape were educational level, average monthly income from selling sex, frequency of alcohol consumption, alcohol containing drinks on a typical day, frequency of heavy episodic drinking, frequency of khat chewing in a week, and condom breakage. HIV status was not significantly associated with either physical violence or rape.

**Table 3. Bivariate logistic regression analyses of independent variables associated with physically beaten in the last 12 months and ever been raped since start selling sex, odds ratios (OR) and 95% confidence intervals (CI)**

| Variables                              | Physical beating<br>OR (95% CI) | Rape<br>OR (95% CI) |
|----------------------------------------|---------------------------------|---------------------|
| <b>Age</b>                             |                                 |                     |
| 15 - 24*                               |                                 |                     |
| 25 - 34                                | 1.02 (0.87, 1.19)               | 1.02 (0.86, 1.21)   |
| 35+                                    | 0.52 (0.37, 0.74)               | 0.88 (0.64, 1.20)   |
| <b>Educational level</b>               |                                 |                     |
| No Education*                          |                                 |                     |
| Primary 1st cycle (1 - 4)              | 1.01 (0.79, 1.31)               | 1.45 (1.14,1.85)    |
| Primary 2nd cycle (5 - 8)              | 1.35 (1.11, 1.63)               | 1.08 (0.88,1.32)    |
| Secondary & above                      | 1.49 (1.18, 1.87)               | 1.09 (0.85,1.41)    |
| <b>Monthly income from selling sex</b> |                                 |                     |
| Less than 1000 birr (<\$50) *          |                                 |                     |
| 1001 - 2000 birr (\$50-\$100)          | 1.44 (1.20, 1.73)               | 0.69 (0.58, 0.85)   |
| 2001 - 3000 birr (\$100-\$150)         | 1.67 (1.35, 2.07)               | 0.51 (0.39, 0.66)   |
| 3001 - 4000 birr (\$150-\$200)         | 1.61 (1.19, 2.17)               | 0.65 (0.46, 0.92)   |
| 4001 - 5000 birr (\$200-\$250)         | 2.12 (1.44, 3.14)               | 1.01 (0.66, 1.55)   |
| Above 5000 birr (>\$250)               | 1.62 (1.01, 2.58)               | 0.75 (0.44, 1.27)   |
| <b>Current marital status</b>          |                                 |                     |
| Never Married*                         |                                 |                     |
| Married/Cohabited                      | 1.05 (0.46, 2.41)               | 0.69 (0.24, 1.96)   |

|    |                                                   |                   |                   |
|----|---------------------------------------------------|-------------------|-------------------|
| 1  |                                                   |                   |                   |
| 2  |                                                   |                   |                   |
| 3  | Separated/Divorced                                | 0.93 (0.80, 1.09) | 1.03 (0.88, 1.21) |
| 4  |                                                   |                   |                   |
| 5  | Widowed                                           | 0.59 (0.37, 0.95) | 1.39 (0.95, 2.06) |
| 6  |                                                   |                   |                   |
| 7  | <b>Sex selling venues</b>                         |                   |                   |
| 8  | Bar/Hotel*                                        |                   |                   |
| 9  |                                                   |                   |                   |
| 10 | Local drinking houses                             | 0.87 (0.69, 1.09) | -                 |
| 11 |                                                   |                   |                   |
| 12 | Spa/Massage/Beauty salon/Own house                | 0.45 (0.28, 0.71) | -                 |
| 13 |                                                   |                   |                   |
| 14 | Red-light houses                                  | 0.95 (0.71, 1.27) | -                 |
| 15 |                                                   |                   |                   |
| 16 | Street                                            | 1.51 (1.26, 1.82) | -                 |
| 17 |                                                   |                   |                   |
| 18 | Other                                             | 1.37 (1.01, 1.86) | -                 |
| 19 | <b>Frequency alcohol consumption</b>              |                   |                   |
| 20 | Never*                                            |                   |                   |
| 21 |                                                   |                   |                   |
| 22 | 2 - 4 days a month                                | 1.82 (1.35, 2.44) | 1.74 (1.27, 2.38) |
| 23 |                                                   |                   |                   |
| 24 | 2 - 3 days a week                                 | 2.07 (1.66, 2.57) | 1.87 (1.48, 2.36) |
| 25 |                                                   |                   |                   |
| 26 | 4 or more days a week                             | 3.54 (2.87, 4.37) | 3.43 (2.75, 4.28) |
| 27 | <b>Alcohol containing drinks on a typical day</b> |                   |                   |
| 28 |                                                   |                   |                   |
| 29 | 1 or 2*                                           |                   |                   |
| 30 |                                                   |                   |                   |
| 31 | 3 or 4                                            | 1.39 (1.09, 1.76) | 1.16 (0.92, 1.46) |
| 32 |                                                   |                   |                   |
| 33 | 5 or 6                                            | 2.03 (1.58, 2.62) | 1.09 (0.84, 1.43) |
| 34 |                                                   |                   |                   |
| 35 | 7 to 9                                            | 2.19 (1.59, 3.03) | 0.98 (0.68, 1.41) |
| 36 |                                                   |                   |                   |
| 37 | 10 or more                                        | 2.76 (1.88, 4.03) | 1.78 (1.20, 2.65) |
| 38 | <b>Frequency of heavy episodic drinking</b>       |                   |                   |
| 39 | Never*                                            |                   |                   |
| 40 |                                                   |                   |                   |
| 41 | Less than monthly                                 | 1.43 (1.03, 1.98) | 1.39 (0.99, 1.95) |
| 42 |                                                   |                   |                   |
| 43 | Monthly                                           | 1.23 (0.90, 1.66) | 1.59 (1.18, 2.13) |
| 44 |                                                   |                   |                   |
| 45 | Weekly                                            | 1.73 (1.39, 2.14) | 1.03 (0.80, 1.31) |
| 46 |                                                   |                   |                   |
| 47 | Daily or almost daily                             | 1.97 (1.53, 2.55) | 1.69 (1.29, 2.21) |
| 48 | <b>Drunk so much and can't remember what</b>      |                   |                   |
| 49 | <b>happened the next day</b>                      |                   |                   |
| 50 |                                                   |                   |                   |
| 51 | No*                                               |                   |                   |
| 52 |                                                   |                   |                   |
| 53 | Yes, in the last 30 days                          | 2.90 (2.37, 3.56) | 1.66 (1.33, 2.07) |
| 54 |                                                   |                   |                   |
| 55 |                                                   |                   |                   |
| 56 |                                                   |                   |                   |
| 57 |                                                   |                   |                   |
| 58 |                                                   |                   |                   |
| 59 |                                                   |                   |                   |
| 60 |                                                   |                   |                   |



|                                            |                   |                   |
|--------------------------------------------|-------------------|-------------------|
| Yes, before last 30 days                   | 2.22 (1.65, 2.99) | 1.27 (0.91, 1.78) |
| <b>Frequency of khat chewing in a week</b> |                   |                   |
| Never*                                     |                   |                   |
| Less than once a week                      | 1.24 (0.96, 1.60) | 0.89 (0.67, 1.19) |
| 1 - 2 days per week                        | 1.67 (1.28, 2.18) | 2.89 (2.26, 3.69) |
| 3 - 4 days per week                        | 2.49 (1.87, 3.34) | 2.92 (2.19, 3.89) |
| 5 - 7 days per week                        | 2.48 (2.08, 2.96) | 1.47 (1.21, 1.79) |
| <b>Condom breakage</b>                     |                   |                   |
| No*                                        |                   |                   |
| Yes                                        | 1.99 (1.69, 2.33) | 1.62 (1.37, 1.92) |
| <b>HIV test result</b>                     |                   |                   |
| Negative*                                  |                   |                   |
| Positive                                   | 1.04 (0.88, 1.24) | 0.88 (0.73, 1.07) |

Note: \* Reference category

### Multivariate analysis of factors associated with physical violence (physically beaten)

Table 4 shows the results of the multivariate analysis used to identify factors associated with physical violence after simultaneously adjusting for all measures included in the analyses. Female sex workers aged 35 years or above (AOR 0.59, 95% CI 0.38, 0.92) were significantly less likely to experience physical violence when compared with the younger age group (15-24years). FSWs who had attended primary first cycle education (AOR 0.71, 95% CI 0.52, 0.97) were also less likely to experience physical beating than those who reported no education. On the other hand, FSWs who worked on the street (AOR 1.92, 95% CI 1.53, 2.39), in red-light houses (AOR 1.63, 95% CI 1.12, 2.38) and in local drinking houses (AOR 1.35, 95% CI 1.02, 1.78) had an increased odds of experiencing physical violence compared with FSWs who worked in bars/hotels. Moreover, substance use was significantly related to physical violence. FSWs who consumed alcohol four or more days in a week (AOR 1.92, 95% CI 1.21, 3.04), those who did not remember what happened the next day due to heavy alcohol consumption both in the past 30 days (AOR 1.98, 95% CI 1.58, 2.49) and before the past 30 days (AOR 1.85, 95% CI 1.35, 2.53), and FSWs who chewed khat 3-4 days per week (AOR 1.58, 95% CI 1.13, 2.21) and 5-7 days per week (AOR

1.43, 95% CI 1.13, 1.80) had more likelihood of experiencing physical violence. Condom breakage experience within the past 30 days prior to the study was also significantly associated with physical violence (AOR 1.51, 95% CI 1.25, 1.84).

**Table 4. Multivariate logistic regression analysis of factors associated with physical violence (physically beaten) in the past twelve months among female sex workers across eleven towns in Ethiopia, odds ratios (OR) and 95% confidence intervals (CI).**

| Variables                              | OR (95%CI)        |
|----------------------------------------|-------------------|
| <b>Age</b>                             |                   |
| 15 - 24*                               |                   |
| 25 - 34                                | 1.04 (0.82, 1.22) |
| 35+                                    | 0.59 (0.38, 0.92) |
| <b>Educational level</b>               |                   |
| No Education*                          |                   |
| Primary 1st cycle (1 - 4)              | 0.71 (0.52, 0.97) |
| Primary 2nd cycle (5 - 8)              | 0.98 (0.77, 1.26) |
| Secondary & above                      | 1.14 (0.85, 1.53) |
| <b>Monthly income from selling sex</b> |                   |
| Less than 1000 birr (<\$50) *          |                   |
| 1001 - 2000 birr (\$50 - \$100)        | 1.13 (0.90, 1.41) |
| 2001 - 3000 birr (\$100 - \$150)       | 1.14 (0.87, 1.48) |
| 3001 - 4000 birr (\$150 - \$200)       | 1.12 (0.77, 1.61) |
| 4001 - 5000 birr (\$200 - \$250)       | 1.44 (0.93, 2.24) |
| Above 5000 birr (>\$250)               | 1.12 (0.63, 1.99) |
| <b>Current marital status</b>          |                   |
| Never Married*                         |                   |
| Married/Cohabited                      | 0.68 (0.24, 1.89) |
| Separated/Divorced                     | 1.08 (0.88, 1.29) |
| Widowed                                | 0.87 (0.48, 1.59) |
| <b>Sex selling venues</b>              |                   |

|                                    |                   |
|------------------------------------|-------------------|
| Bar/Hotel*                         |                   |
| Local drinking houses              | 1.35 (1.02, 1.78) |
| Spa/massage/beauty salon/own house | 1.04 (0.58, 1.84) |
| Red-light houses                   | 1.63 (1.12, 2.38) |
| Street                             | 1.92 (1.53, 2.39) |
| Other                              | 1.39 (0.98, 1.99) |

### Frequency alcohol consumption

|                       |                   |
|-----------------------|-------------------|
| Never*                |                   |
| 2 - 4 days a month    | 1.25 (0.77, 2.04) |
| 2 - 3 days a week     | 1.32 (0.84, 2.06) |
| 4 or more days a week | 1.92 (1.21, 3.04) |

### Alcohol containing drinks on a typical day

|            |                   |
|------------|-------------------|
| 1 or 2*    |                   |
| 3 or 4     | 1.08 (0.84, 1.39) |
| 5 or 6     | 1.15 (0.85, 1.57) |
| 7 to 9     | 1.09 (0.74, 1.64) |
| 10 or more | 1.14 (0.72, 1.81) |

### Frequency of heavy episodic drinking

|                       |                   |
|-----------------------|-------------------|
| Never*                |                   |
| Less than monthly     | 1.07 (0.75, 1.52) |
| Monthly               | 0.84 (0.59, 1.18) |
| Weekly                | 1.07 (0.82, 1.39) |
| Daily or almost daily | 0.99 (0.71, 1.38) |

### Drunk so much and can't remember what happened the next day

|                          |                   |
|--------------------------|-------------------|
| No*                      |                   |
| Yes, in the last 30 days | 1.98 (1.58, 2.49) |
| Yes, before last 30 days | 1.85 (1.35, 2.53) |

### Frequency of khat chewing in a week

Never\*

|                       |                   |
|-----------------------|-------------------|
| Less than once a week | 1.04 (0.77, 1.42) |
| 1 - 2 days per week   | 1.30 (0.96, 1.77) |
| 3 - 4 days per week   | 1.58 (1.13, 2.21) |
| 5 - 7 days per week   | 1.43 (1.13, 1.80) |

### Condom breakage

|     |                   |
|-----|-------------------|
| No* |                   |
| Yes | 1.51 (1.25, 1.84) |

Note: \* Reference category

### Multivariate analysis of factors associated with sexual violence (rape)

Table 5 shows the results of the multivariate logistic regression analyses used to identify factors that were significantly associated with rape after simultaneously adjusting for all measures included in the analyses. Female sex workers with a monthly income of \$50 to \$200 were significantly less likely to experience rape compared to those with a monthly income of below \$50. Drinking alcohol four or more days per week (AOR 2.33, 95% CI 1.47, 3.7), experience of heavy drinking in the last 30 days and not remembering what happened the next day (AOR 1.34, 95% CI 1.05, 1.72), experience of heavy episodic drinking (HED) in a month (AOR 1.71, 95% CI 1.24, 2.38), experience of HED almost daily (AOR 1.49, 95% CI 1.06, 2.11), and chewing khat 1-2 days (AOR 2.13, 95% CI 1.61, 2.83) and 3-4 days (AOR 2.15, 95% CI 1.55, 2.98) per week were positively associated with rape. Moreover, condom breakage (AOR 1.26, 95% CI 1.03, 1.55) was significantly more frequent among FSWs who reported rape.

**Table 5. Multivariate logistic regression analysis of factors associated with sexual violence (rape) since sex selling start among female sex workers across eleven towns in Ethiopia, odds ratios (OR) and 95% confidence intervals (CI).**

| Variables                              | OR (95%CI)        |
|----------------------------------------|-------------------|
| <b>Monthly income from selling sex</b> |                   |
| Less than 1000 birr (<\$50) *          |                   |
| 1001 - 2000 birr (\$50-\$100)          | 0.62 (0.49, 0.77) |

|                                |                   |
|--------------------------------|-------------------|
| 2001 - 3000 birr (\$100-\$150) | 0.42 (0.32, 0.57) |
| 3001 - 4000 birr (\$150-\$200) | 0.45 (0.29, 0.69) |
| 4001 - 5000 birr (\$200-\$250) | 0.84 (0.53, 1.33) |
| Above 5000 birr (>\$250)       | 0.62 (0.34, 1.15) |

### Current marital status

|                    |                   |
|--------------------|-------------------|
| Never Married*     |                   |
| Married/Cohabited  | 0.57 (0.17, 1.97) |
| Separated/Divorced | 1.01 (0.83, 1.22) |
| Widowed            | 1.61 (0.98, 2.63) |

### Educational level

|                           |                   |
|---------------------------|-------------------|
| No Education*             |                   |
| Primary 1st cycle (1 - 4) | 1.06 (0.79, 1.43) |
| Primary 2nd cycle (5 - 8) | 0.83 (0.65, 1.07) |
| Secondary & above         | 0.92 (0.68, 1.25) |

### Frequency of alcohol consumption

|                       |                   |
|-----------------------|-------------------|
| Never*                |                   |
| 2 - 4 days a month    | 1.15 (0.69, 1.89) |
| 2 - 3 days a week     | 1.24 (0.78, 1.96) |
| 4 or more days a week | 2.33 (1.47, 3.73) |

### Drunk so much and can't remember what happened the next day

|                          |                   |
|--------------------------|-------------------|
| No*                      |                   |
| Yes, in the last 30 days | 1.34 (1.05, 1.72) |
| Yes, before last 30 days | 1.07 (0.75, 1.52) |

### Frequency of heavy episodic drinking

|                       |                   |
|-----------------------|-------------------|
| Never*                |                   |
| Less than monthly     | 1.61 (1.12, 2.32) |
| Monthly               | 1.71 (1.24, 2.38) |
| Weekly                | 1.04 (0.78, 1.38) |
| Daily or almost daily | 1.49 (1.06, 2.11) |

### Frequency of khat chewing in a week

Never\*

less than once a week 0.83 (0.59, 1.16)

1 - 2 days per week 2.13 (1.61, 2.83)

3 - 4 days per week 2.15 (1.55, 2.98)

5 - 7 days per week 1.06 (0.83, 1.36)

### Condom breakage

No\*

Yes 1.26 (1.03, 1.55)

---

Note: \* Reference category

## Discussion

According to this study, 17.5% of FSWs in Ethiopia had been physically beaten within the past 12 months and 15.2% had been raped since they started selling sex. Age, sex selling venues, and high consumption of alcohol and khat were significant predictors of physical violence (beating). On the other hand, the significant predictors of sexual violence (rape) were low income and high consumption of alcohol and khat.

The prevalence of both physical violence and sexual violence (rape) was lower than the prevalence found in studies conducted in Uganda, Ivory Coast, and Kenya (9, 12, 30, 32). However, when compared to the studies conducted in Adama (Ethiopia), China, India, and Mexico, the current study reported a higher prevalence of both physical and sexual violence (10, 11, 13, 14, 33). The difference in the definition of violence used might be one of the possible explanations for the difference between the current result and those found in other studies in Africa. Most of the studies assessed all forms of physical and sexual violence while the current study assessed solely physical beating and forced penetrative sex (rape). On the other hand, differences in results across settings might also be due to differences in background and contextual factors such as socio-economic status and cultural aspects.

1  
2  
3 Several studies showed that younger FSWs are more exposed to physical and sexual violence (13,  
4 34) in line with the current findings that younger FSWs (15-24 years) were at higher risk for  
5 physical violence when compared to their older counterparts (35+years). Perpetrators find it easier  
6 to manipulate younger FSWs and this might play a role in their increased exposure to violence.  
7 That younger FSWs are especially vulnerable to violence has important implications due to the  
8 increasing number of younger FSWs who are entering the sex trade. Therefore, to minimize the  
9 vulnerability of younger FSWs, intervention programs need to create awareness about the factors  
10 that increase the likelihood of violence and to ensure that younger FSWs are particularly addressed  
11 in such programs.  
12  
13  
14  
15  
16  
17  
18  
19

20 Even though sex work is not a legally recognized profession in Ethiopia, most of the establishments  
21 where the sex workers are based (hotels, bars/restaurants, nightclubs, etc.) operate legally with  
22 working licenses. Nevertheless, some FSWs work on the street and in red-light houses where they  
23 manage their own working area. Consequently, the extent to which physical violence occurs may  
24 vary according to their working area. The present study revealed that FSWs who mainly work in  
25 bars and hotels face less physical beating when compared with FSWs who work on the street, in  
26 red-light houses and local drinking houses. This finding is in line with studies conducted in New  
27 York City and England (20, 21). This might be due to the level of protection in their working areas  
28 and/or due to the type of clients who frequents those localities. This means that engaging bar/hotel  
29 managers in the prevention activities could be an additional strategy to decrease violence against  
30 FSWs.  
31  
32  
33  
34  
35  
36  
37  
38  
39

40 On the other hand, FSWs who work on the street, in red-light houses and local drinking houses  
41 experienced more violence. Most of these venues are located in the slum areas of the cities, and  
42 such areas are often the focus of police efforts to control various unwanted activities. In this regard,  
43 FSWs are targets of harassment, physical violence and arrest by police. The actions of the police  
44 towards FSWs might also serve to legitimize violence against FSWs in the community (especially  
45 among FSWs residing in slum areas), thus increasing such acts of violence. Therefore, to minimize  
46 the harm in these localities, involving the police force in violence prevention activities is crucial  
47 and should be one of the first step. In addition, a peer education program led by the sex workers  
48 could be an additional strategy. Such a program could help FSWs to create an information sharing  
49  
50  
51  
52  
53  
54  
55

1  
2  
3 platform to discuss the incidences of violence, types of perpetrators, etc., which could raise  
4 awareness and help them to become more alert.  
5  
6

7  
8 Furthermore, an association between alcohol use and higher frequency of physical violence and  
9 rape was reported. In particular, FSWs who consume alcohol more than four days per week and  
10 those with experience of HED were significantly more likely to experience violence. Several  
11 studies conducted in Ethiopia, Uganda, and Kenya also reported similar findings (9, 10, 12, 19).  
12 A large proportion of female sex workers (FSWs) use alcohol prior to or during sex to help them  
13 to solicit clients and overcome their shyness (35, 36). In particular high level of alcohol  
14 consumption places FSWs at a disadvantage by intensifying their vulnerability (8). Research  
15 reviews also report that alcohol use impairs FSWs' ability to detect the risk of violence and  
16 increases their vulnerability to risk-prone situations (37, 38). The consequences of HED are not  
17 just limited to the physical effects of intoxication but further expose them to violence and risky  
18 sexual behaviors.  
19  
20  
21  
22  
23  
24  
25  
26

27  
28 Correspondingly, chewing khat more days in a week was significantly associated with experience  
29 of physical violence and rape. After chewing khat, some of the users consume alcohol-containing  
30 beverages to decrease the level of stimulation. Although there is no previous study on the  
31 relationship between khat chewing and experience of violence among FSWs, most FSWs chew  
32 khat before departing for work. In the bar, they drink alcohol to minimize the effect, which in turn  
33 exposes them to HED and violence. Further studies should assess the independent contribution of  
34 khat chewing to increasing violence occurrence.  
35  
36  
37  
38  
39  
40

41 The extent to which alcohol use and khat chewing are risk factors for the occurrence of experiences  
42 of violence must be interpreted with caution. Since physical beating was measured within the past  
43 12 months and rape was measured since they started selling sex, the participants' current khat  
44 chewing or alcohol consumption status might not be an accurate indicator of their consumption  
45 patterns at the time of the violence. In addition, the current use of substances might be a means to  
46 cope with the trauma related to the experience of violence.  
47  
48  
49  
50  
51  
52  
53  
54  
55  
56  
57  
58  
59  
60



1  
2  
3 In addition, the resistance to condom use from clients and the violence experience may create a  
4 difficult situation for FSWs with regard to the proper use of condoms, which further exposes FSWs  
5 to HIV and other STIs. In this study, there was a significant relationship between condom breakage  
6 and history of physical beating and rape. Even though there was no significant association between  
7 HIV and violence, the proportion of HIV positive FSWs in the sample was high (23%). A study  
8 conducted in Benin reported a similar finding concerning the association between condom  
9 breakage and violence, but unlike our study there was a significant association between HIV and  
10 violence experience (23). This finding indicates that solely providing condoms will not be effective  
11 to prevent HIV and other STIs transmission. Instead, working on factors that contribute to  
12 improper use of condoms (such as violence) could be an additional strategy for HIV prevention  
13 programs.  
14  
15  
16  
17  
18  
19  
20  
21  
22

23 In general, our study demonstrates that sex workers are particularly vulnerable to physical beating  
24 and rape. Nevertheless, the harm reduction program among FSWs in Ethiopia is poor. Given the  
25 associations between violence and unprotected sex, the HIV control program may not accomplish  
26 its goal of reducing the number of new infections without also addressing violence. Therefore,  
27 combining both programs could yield better results with regard to attaining epidemic control as  
28 well as reducing the harm associated with violence. In addition, this study shows that different  
29 factors (such as sex selling venues, the age of FSWs, and level of alcohol use etc.) were associated  
30 with violence among FSWs, signifying the need for different approaches to minimize the incidence  
31 of violence (39). At the individual level, efforts to reduce violence could focus on developing  
32 educational materials and creating awareness for sex workers about their legal rights and about  
33 how to prevent, reduce and respond to violence (40). In addition, involving the community in the  
34 prevention program could play a vital role especially towards reducing stigma and discrimination  
35 towards FSWs, which in turn would create a suitable environment for FSWs to stand up for their  
36 rights. Furthermore, involving police and law enforcement authorities to reduce harassment could  
37 play a greater role in violence reduction.  
38  
39  
40  
41  
42  
43  
44  
45  
46  
47  
48  
49

50 Finally, there were some similarities but also differences concerning the predictors of rape and  
51 physical violence. For example, being in the younger age group was a significant predictor of  
52 physical beating but not rape, and having lower income was associated with rape but not with  
53  
54

1  
2  
3 physical beating. Nevertheless, based on the current data, it is difficult to draw any conclusions  
4 about why one variable would matter for physical beating but not for rape. The reasons underlying  
5 the differences are currently unknown, and further research might be required to gain an  
6 understanding of the patterns observed.  
7  
8  
9

### 10 11 **Methodological considerations** 12

13  
14 There are a limited number of studies on violence among FSWs in Ethiopia and the existing studies  
15 are restricted to one city (9, 10). One of the strengths of this study is that it involves multiple sites  
16 (eleven large towns) across the country. The second strength is the sampling technique; the study  
17 used a respondent-driven sampling, which is a strategy recommended for hard-to-reach  
18 populations and which is believed to give a representative sample of the target population. The  
19 third strength is the assessment of FSWs' HIV status on site using the national testing algorithm.  
20 In addition, the pilot study conducted prior to the actual implementation added strength to the main  
21 study protocol.  
22  
23  
24  
25  
26  
27  
28

29 This study also had limitations. First, sexual and physical violence are sensitive topics that are  
30 subject to underreporting because of social desirability bias. Second, recall bias could have  
31 occurred because participants were asked about physical violence in the past year and rape since  
32 they started selling sex. We tried to minimize underreporting through intense interviewer training.  
33 In addition, since it was a cross-sectional study, participants were assessed only once; thus, it  
34 would be difficult to infer the temporal association between a risk factor and the outcome  
35 measures, i.e. physical violence and rape.  
36  
37  
38  
39  
40  
41

42 Furthermore, the results regarding correlates of physical and sexual violence among FSWs in  
43 Ethiopia might have limited generalizability across settings. However, these results are likely to  
44 be relevant for other FSWs in other African countries that have a similar setting as Ethiopia, and  
45 may inform targeted prevention strategies for this key population.  
46  
47  
48  
49

### 50 **Conclusion** 51

52 In general, FSWs are vulnerable to physical and sexual violence, and the risk increases when they  
53 are younger, street-based, and are high consumers of alcohol or khat. Therefore, to reduce physical  
54

1  
2  
3 and sexual violence, strategies to secure and improve their work environment should be a critical  
4 component of targeted interventions. Increasing awareness regarding the role of khat chewing and  
5 alcohol drinking towards vulnerability to violence should be an integral component of HIV  
6 prevention and violence reduction programs. In addition, targeted efforts should be made for the  
7 younger FSWs in order to reduce their vulnerability.  
8  
9  
10  
11  
12

### 13 **Acknowledgments**

14 We would like to express gratitude to the study participants and the data collectors.

15 **Conflict of Interest:** None to declare.

### 16 **Authors contributions**

17 MA and AA developed the study design. MA analyzed and interpreted the data and drafted the  
18 manuscript. AA was involved in the data analysis and interpretation, and in the writing of the  
19 manuscript. TT was involved in the interpretation of the data and contributed to the writing of the  
20 manuscript. All authors approved the final manuscript.  
21  
22  
23  
24  
25  
26

27 **Funding:** This research received no specific grant from any funding agency.

28 **Data sharing statement:** No additional data available.  
29  
30  
31

### 32 **Reference**

- 33  
34  
35 1. Jewkes R. Intimate partner violence: causes and prevention. *The Lancet*. 2002;359(9315):1423-  
36 9.  
37  
38 2. World Health Organization, Global and regional estimates of violence against women: prevalence and health effects of intimate partner violence and non-partner sexual violence: executive summary.  
39  
40  
41  
42  
43 [https://apps.who.int/iris/bitstream/handle/10665/85239/9789241564625\\_eng.pdf;jsessionid=6](https://apps.who.int/iris/bitstream/handle/10665/85239/9789241564625_eng.pdf;jsessionid=6E940F74EB1BC5204EEDE0FC6D26F358?sequence=1)  
44 [E940F74EB1BC5204EEDE0FC6D26F358?sequence=1](https://apps.who.int/iris/bitstream/handle/10665/85239/9789241564625_eng.pdf;jsessionid=6E940F74EB1BC5204EEDE0FC6D26F358?sequence=1)  
45  
46  
47 3. Glasier A, Gulmezoglu AM, Schmid GP, Moreno CG, Van Look PF. Sexual and reproductive  
48 health: a matter of life and death. *The lancet*. 2006;368(9547):1595-607.  
49  
50  
51 4. Perry A. Risk Factors of Gender-based Sexual Violence. RTM Insights.23.  
52 [http://www.rutgerscps.org/uploads/2/7/3/7/27370595/riskfactorsofgenderbasedsexual\\_violence](http://www.rutgerscps.org/uploads/2/7/3/7/27370595/riskfactorsofgenderbasedsexual_violence_rtminsights23.pdf)  
53 [\\_rtminsights23.pdf](http://www.rutgerscps.org/uploads/2/7/3/7/27370595/riskfactorsofgenderbasedsexual_violence_rtminsights23.pdf)  
54  
55  
56  
57  
58  
59  
60

- 1  
2  
3 5. Godwin J. Sex Work and the Law in Asia and the Pacific. Bangkok: United Nations Develop  
4 ment Programme.  
5  
6 [http://www.undp.org/content/dam/undp/library/hivaids/English/HIV2012SexWorkAndLaw.p](http://www.undp.org/content/dam/undp/library/hivaids/English/HIV2012SexWorkAndLaw.pdf)  
7 [df](http://www.undp.org/content/dam/undp/library/hivaids/English/HIV2012SexWorkAndLaw.pdf)  
8  
9
- 10 6. The Criminal Code of the Federal Democratic Republic of Ethiopia Article 634:(Proclamation  
11 No. 414/2004) 2004.  
12
- 13 7. World Health Organization, Addressing violence against women and achieving the Millennium  
14 Development Goals. 2005.  
15
- 16 8. World Health Organization, Addressing Violence against Sex Workers 2013.  
17  
18 [https://www.who.int/hiv/pub/sti/sex\\_worker\\_implementation/swit\\_chpt2.pdf](https://www.who.int/hiv/pub/sti/sex_worker_implementation/swit_chpt2.pdf)  
19
- 20 9. Alemayehu M, Yohannes G, Damte A, Fantahun A, Gebrekirstos K, Tsegay R, et al. Prevalence  
21 and predictors of sexual violence among commercial sex workers in Northern Ethiopia.  
22 Reproductive health. 2015;12(1):47.  
23
- 24 10. Mooney A, Kidanu A, Bradley HM, Kumoji EK, Kennedy CE, Kerrigan D. Work-related  
25 violence and inconsistent condom use with non-paying partners among female sex workers in  
26 Adama City, Ethiopia. BMC public health. 2013;13(1):771.  
27
- 28 11. Misganaw AC, Worku YA. Assessment of sexual violence among street females in Bahir-Dar  
29 town, North West Ethiopia: a mixed method study. BMC Public Health.13(1):825.  
30
- 31 12. Schwitters A, Swaminathan M, Serwadda D, Muyonga M, Shiraishi RW, Benech I, et al.  
32 Prevalence of rape and client-initiated gender-based violence among female sex workers:  
33 Kampala, Uganda, 2012. AIDS and Behavior.19(1):68-76.  
34
- 35 13. Beattie TS, Bhattacharjee P, Ramesh B, Gurnani V, Anthony J, Isac S, et al. Violence against  
36 female sex workers in Karnataka state, south India: impact on health, and reductions in violence  
37 following an intervention program. BMC Public Health. p. 476.  
38
- 39 14. Kelvin EA, Sun X, Mantell JE, Zhou J, Mao J, Peng Y. Vulnerability to sexual violence and  
40 participation in sex work among high-end entertainment centre workers in Hunan Province,  
41 China. Sexual health.10(5):391-9.  
42
- 43 15. Wolffers I. Violence repression and other health threats. Research for sex work. 2001;4:1-2.  
44  
45 <https://www.nswp.org/sites/nswp.org/files/research-for-sex-work-4-english.pdf>  
46  
47  
48  
49  
50  
51  
52  
53  
54

16. Hanck SE, Blankenship KM, Irwin KS, West BS, Kershaw T. Assessment of self-reported sexual behavior and condom use among female sex workers in India using a polling box approach: a preliminary report. *Sexually transmitted diseases*. 2008;35(5):489-94.
17. Parcesepe AM, Kelly L, Martin SL, Green S, Sinkele W, Suchindran C, et al. The impact of an alcohol harm reduction intervention on interpersonal violence and engagement in sex work among female sex workers in Mombasa, Kenya: Results from a randomized controlled trial. *Drug and alcohol dependence*.161:21-8.
18. Wechsberg WM, Luseno WK, Lam WK, Parry CD, Morojele NK. Substance use, sexual risk, and violence: HIV prevention intervention with sex workers in Pretoria. *AIDS and Behavior*. 2006;10(2):131.
19. Chersich M, Luchters S, Malonza I, Mwarogo P, King'Ola N, Temmerman M. Heavy episodic drinking among Kenyan female sex workers is associated with unsafe sex, sexual violence and sexually transmitted infections. *International journal of STD & AIDS*2007. p. 764-9.
20. Church S, Henderson M, Barnard M, Hart G. Violence by clients towards female prostitutes in different work settings: questionnaire survey. *Bmj*. 2001;322(7285):524-5.
21. El-Bassel N, Witte SS, Wada T, Gilbert L, Wallace J. Correlates of partner violence among female street-based sex workers: substance abuse, history of childhood abuse, and HIV risks. *AIDS patient care and STDs*. 2001;15(1):41-51.
22. Masvawure TB, Mantell JE, Tocco JU, Gichangi P, Restar A, Chabeda SV, et al. Intentional and unintentional condom breakage and slippage in the sexual interactions of female and male sex workers and clients in Mombasa, Kenya. *AIDS and Behavior*.22(2):637-48.
23. Tounkara FK, Diabate S, Guedou FA, Ahoussinou Cm, Kintin Fdr, Zannou DM, et al. Violence, condom breakage and HIV infection among female sex workers in Benin, West Africa. *Sexually transmitted diseases*.41(5):312.
24. Choi SY, Chen KL, Jiang ZQ. Client-perpetuated violence and condom failure among female sex workers in southwestern China. *Sex Transm Dis*2008.
25. Wilson KS, Deya R, Yuhua K, Simoni J, Vander Stoep A, Shafi J, et al. A prospective cohort study of intimate partner violence and unprotected sex in HIV-positive female sex workers in Mombasa, Kenya. *AIDS and Behavior*.20(9):2054-64.

- 1
- 2
- 3 26. Okal J, Chersich MF, Tsui S, Sutherland E, Temmerman M, Luchters S. Sexual and physical
- 4 violence against female sex workers in Kenya: a qualitative enquiry. *AIDS care*.23(5):612-8.
- 5
- 6 27. Ethiopian National Key Population HIV Bio-behavioral Surveillance Round I Report. 2013
- 7
- 8 28. HIV Related Estimates and Projections for Ethiopia-2015
- 9
- 10 29. Decker MR, Lyons C, Billong SC, Njindam IM, Grosso A, Nunez GT, et al. Gender-based
- 11 violence against female sex workers in Cameroon: prevalence and associations with sexual HIV
- 12 risk and access to health services and justice. *Sex Transm Infect*.92(8):599-604.
- 13
- 14 30. Lyons CE, Grosso A, Drame FM, Ketende S, Diouf D, Ba I, et al. Physical and Sexual Violence
- 15 Affecting Female Sex Workers in Abidjan, CÃ´te d'Ivoire: Prevalence, and the Relationship with
- 16 the Work Environment, HIV, and Access to Health Services. *JAIDS Journal of Acquired*
- 17 *Immune Deficiency Syndromes*.75(1):9-17.
- 18
- 19 31. World Health Organization, Assessment of khat (*Catha edulis* Forsk) 34th ECDD 2006/4.4.
- 20 [http://www.who.int/medicines/areas/quality\\_safety/4.4KhatCritReview.pdf](http://www.who.int/medicines/areas/quality_safety/4.4KhatCritReview.pdf).
- 21
- 22 32. Wilson KS, Deya R, Masese L, Simoni JM, Stoep AV, Shafi J, et al. Prevalence and correlates
- 23 of intimate partner violence in HIV-positive women engaged in transactional sex in Mombasa,
- 24 Kenya. *International journal of STD & AIDS*.27(13):1194-203.
- 25
- 26 33. Semple SJ, Stockman JK, Pitpitan EV, Strathdee SA, Chavarin CV, Mendoza DV, et al.
- 27 Prevalence and correlates of client-perpetrated violence against female sex workers in 13
- 28 Mexican cities. *PloS one*.10(11):e0143317.
- 29
- 30 34. Silverman JG. Adolescent female sex workers: invisibility, violence and HIV. *Archives of*
- 31 *disease in childhood*.archdischild178715.
- 32
- 33 35. Sharma S, Singh S, Talukdar B. Understanding the Factors Associated with Alcohol Use among
- 34 Female Sex Workers in a High HIV Prevalence Northeast State of India. *J Infec Dis Treat*.
- 35 2016;2:1.
- 36
- 37 36. Wechsberg WM, Luseno WK, Lam W. Violence against substance-abusing South African sex
- 38 workers: intersection with culture and HIV risk. *AIDS care*. 2005;17(sup1):55-64.
- 39
- 40 37. George WH, Stoner SA. Understanding acute alcohol effects on sexual behavior. *Annual review*
- 41 *of sex research*. 2000;11(1):92-124.
- 42
- 43
- 44
- 45
- 46
- 47
- 48
- 49
- 50
- 51
- 52
- 53
- 54
- 55
- 56
- 57
- 58
- 59
- 60

- 1  
2  
3 38. Mbonye M, Rutakumwa R, Weiss H, Seeley J. Alcohol consumption and high risk sexual  
4 behaviour among female sex workers in Uganda. *African Journal of AIDS Research*.13(2):145-  
5 51.  
6  
7  
8 39. Reed E, Gupta J, Biradavolu M, Devireddy V, Blankenship KM. The context of economic  
9 insecurity and its relation to violence and risk factors for HIV among female sex workers in  
10 Andhra Pradesh, India. *Public Health Reports*. 2010;125(4\_suppl):81-9.  
11  
12 40. Hail-Jares K, Chang RC, Choi S, Zheng H, He N, Huang ZJ. Intimate-partner and client-initiated  
13 violence among female street-based sex workers in China: does a support network help? *PloS*  
14 *one*. 2015;10(9):e0139161.  
15  
16  
17  
18  
19  
20  
21  
22  
23  
24  
25  
26  
27  
28  
29  
30  
31  
32  
33  
34  
35  
36  
37  
38  
39  
40  
41  
42  
43  
44  
45  
46  
47  
48  
49  
50  
51  
52  
53  
54  
55  
56  
57  
58  
59  
60

# Reporting checklist for cross sectional study.

Based on the STROBE cross sectional guidelines.

## Instructions to authors

Complete this checklist by entering the page numbers from your manuscript where readers will find each of the items listed below.

Your article may not currently address all the items on the checklist. Please modify your text to include the missing information. If you are certain that an item does not apply, please write "n/a" and provide a short explanation.

Upload your completed checklist as an extra file when you submit to a journal.

In your methods section, say that you used the STROBE cross sectional reporting guidelines, and cite them as:

von Elm E, Altman DG, Egger M, Pocock SJ, Gotsche PC, Vandembroucke JP. The Strengthening the Reporting of Observational Studies in Epidemiology (STROBE) Statement: guidelines for reporting observational studies.

|          |                     | Reporting Item                                                                                  | Page Number |
|----------|---------------------|-------------------------------------------------------------------------------------------------|-------------|
| Title    | <a href="#">#1a</a> | Indicate the study's design with a commonly used term in the title or the abstract              | 1           |
| Abstract | <a href="#">#1b</a> | Provide in the abstract an informative and balanced summary of what was done and what was found | 1           |



|    |                      |                     |                                                                   |         |
|----|----------------------|---------------------|-------------------------------------------------------------------|---------|
| 1  | Background /         | <a href="#">#2</a>  | Explain the scientific background and rationale for the           | 2       |
| 2  |                      |                     |                                                                   |         |
| 3  | rationale            |                     | investigation being reported                                      |         |
| 4  |                      |                     |                                                                   |         |
| 5  |                      |                     |                                                                   |         |
| 6  | Objectives           | <a href="#">#3</a>  | State specific objectives, including any prespecified             | 3       |
| 7  |                      |                     | hypotheses                                                        |         |
| 8  |                      |                     |                                                                   |         |
| 9  |                      |                     |                                                                   |         |
| 10 |                      |                     |                                                                   |         |
| 11 | Study design         | <a href="#">#4</a>  | Present key elements of study design early in the paper           | 4       |
| 12 |                      |                     |                                                                   |         |
| 13 |                      |                     |                                                                   |         |
| 14 |                      |                     |                                                                   |         |
| 15 | Setting              | <a href="#">#5</a>  | Describe the setting, locations, and relevant dates, including    | 4, 5, 6 |
| 16 |                      |                     | periods of recruitment, exposure, follow-up, and data collection  |         |
| 17 |                      |                     |                                                                   |         |
| 18 |                      |                     |                                                                   |         |
| 19 |                      |                     |                                                                   |         |
| 20 | Eligibility criteria | <a href="#">#6a</a> | Give the eligibility criteria, and the sources and methods of     | 5       |
| 21 |                      |                     | selection of participants.                                        |         |
| 22 |                      |                     |                                                                   |         |
| 23 |                      |                     |                                                                   |         |
| 24 |                      |                     |                                                                   |         |
| 25 |                      |                     |                                                                   |         |
| 26 |                      | <a href="#">#7</a>  | Clearly define all outcomes, exposures, predictors, potential     | 6       |
| 27 |                      |                     | confounders, and effect modifiers. Give diagnostic criteria, if   |         |
| 28 |                      |                     | applicable                                                        |         |
| 29 |                      |                     |                                                                   |         |
| 30 |                      |                     |                                                                   |         |
| 31 |                      |                     |                                                                   |         |
| 32 |                      |                     |                                                                   |         |
| 33 | Data sources /       | <a href="#">#8</a>  | For each variable of interest give sources of data and details of | 6       |
| 34 | measurement          |                     | methods of assessment (measurement). Describe                     |         |
| 35 |                      |                     | comparability of assessment methods if there is more than one     |         |
| 36 |                      |                     | group. Give information separately for for exposed and            |         |
| 37 |                      |                     | unexposed groups if applicable.                                   |         |
| 38 |                      |                     |                                                                   |         |
| 39 |                      |                     |                                                                   |         |
| 40 |                      |                     |                                                                   |         |
| 41 |                      |                     |                                                                   |         |
| 42 |                      |                     |                                                                   |         |
| 43 |                      |                     |                                                                   |         |
| 44 |                      |                     |                                                                   |         |
| 45 | Bias                 | <a href="#">#9</a>  | Describe any efforts to address potential sources of bias         | 2, 18   |
| 46 |                      |                     |                                                                   |         |
| 47 |                      |                     |                                                                   |         |
| 48 | Study size           | <a href="#">#10</a> | Explain how the study size was arrived at                         | 5       |
| 49 |                      |                     |                                                                   |         |
| 50 |                      |                     |                                                                   |         |
| 51 | Quantitative         | <a href="#">#11</a> | Explain how quantitative variables were handled in the            | 6       |
| 52 | variables            |                     | analyses. If applicable, describe which groupings were chosen,    |         |
| 53 |                      |                     | and why                                                           |         |
| 54 |                      |                     |                                                                   |         |
| 55 |                      |                     |                                                                   |         |
| 56 |                      |                     |                                                                   |         |
| 57 |                      |                     |                                                                   |         |
| 58 |                      |                     |                                                                   |         |
| 59 |                      |                     |                                                                   |         |
| 60 |                      |                     |                                                                   |         |

|    |                     |                      |                                                                                                                                                                                                                                                                                |                |  |
|----|---------------------|----------------------|--------------------------------------------------------------------------------------------------------------------------------------------------------------------------------------------------------------------------------------------------------------------------------|----------------|--|
| 1  | Statistical methods | <a href="#">#12a</a> | Describe all statistical methods, including those used to control for confounding                                                                                                                                                                                              | 7              |  |
| 2  |                     |                      |                                                                                                                                                                                                                                                                                |                |  |
| 3  |                     |                      |                                                                                                                                                                                                                                                                                |                |  |
| 4  |                     |                      |                                                                                                                                                                                                                                                                                |                |  |
| 5  |                     |                      |                                                                                                                                                                                                                                                                                |                |  |
| 6  |                     |                      |                                                                                                                                                                                                                                                                                |                |  |
| 7  |                     | <a href="#">#12b</a> | Describe any methods used to examine subgroups and interactions                                                                                                                                                                                                                | NA             |  |
| 8  |                     |                      |                                                                                                                                                                                                                                                                                |                |  |
| 9  |                     |                      |                                                                                                                                                                                                                                                                                |                |  |
| 10 |                     |                      |                                                                                                                                                                                                                                                                                |                |  |
| 11 |                     |                      |                                                                                                                                                                                                                                                                                |                |  |
| 12 |                     | <a href="#">#12c</a> | Explain how missing data were addressed                                                                                                                                                                                                                                        | 8              |  |
| 13 |                     |                      |                                                                                                                                                                                                                                                                                |                |  |
| 14 |                     |                      |                                                                                                                                                                                                                                                                                |                |  |
| 15 |                     | <a href="#">#12d</a> | If applicable, describe analytical methods taking account of sampling strategy                                                                                                                                                                                                 | NA             |  |
| 16 |                     |                      |                                                                                                                                                                                                                                                                                |                |  |
| 17 |                     |                      |                                                                                                                                                                                                                                                                                |                |  |
| 18 |                     |                      |                                                                                                                                                                                                                                                                                |                |  |
| 19 |                     |                      |                                                                                                                                                                                                                                                                                |                |  |
| 20 |                     |                      |                                                                                                                                                                                                                                                                                |                |  |
| 21 |                     | <a href="#">#12e</a> | Describe any sensitivity analyses                                                                                                                                                                                                                                              | 7              |  |
| 22 |                     |                      |                                                                                                                                                                                                                                                                                |                |  |
| 23 | Participants        | <a href="#">#13a</a> | Report numbers of individuals at each stage of study—eg numbers potentially eligible, examined for eligibility, confirmed eligible, included in the study, completing follow-up, and analysed. Give information separately for for exposed and unexposed groups if applicable. | 5              |  |
| 24 |                     |                      |                                                                                                                                                                                                                                                                                |                |  |
| 25 |                     |                      |                                                                                                                                                                                                                                                                                |                |  |
| 26 |                     |                      |                                                                                                                                                                                                                                                                                |                |  |
| 27 |                     |                      |                                                                                                                                                                                                                                                                                |                |  |
| 28 |                     |                      |                                                                                                                                                                                                                                                                                |                |  |
| 29 |                     |                      |                                                                                                                                                                                                                                                                                |                |  |
| 30 |                     |                      |                                                                                                                                                                                                                                                                                |                |  |
| 31 |                     |                      |                                                                                                                                                                                                                                                                                |                |  |
| 32 |                     |                      |                                                                                                                                                                                                                                                                                |                |  |
| 33 |                     |                      |                                                                                                                                                                                                                                                                                |                |  |
| 34 |                     |                      |                                                                                                                                                                                                                                                                                |                |  |
| 35 |                     |                      |                                                                                                                                                                                                                                                                                |                |  |
| 36 |                     | <a href="#">#13b</a> | Give reasons for non-participation at each stage                                                                                                                                                                                                                               | 5              |  |
| 37 |                     |                      |                                                                                                                                                                                                                                                                                |                |  |
| 38 |                     |                      |                                                                                                                                                                                                                                                                                |                |  |
| 39 |                     | <a href="#">#13c</a> | Consider use of a flow diagram                                                                                                                                                                                                                                                 |                |  |
| 40 |                     |                      |                                                                                                                                                                                                                                                                                |                |  |
| 41 | Descriptive data    | <a href="#">#14a</a> | Give characteristics of study participants (eg demographic, clinical, social) and information on exposures and potential confounders. Give information separately for exposed and unexposed groups if applicable.                                                              |                |  |
| 42 |                     |                      |                                                                                                                                                                                                                                                                                |                |  |
| 43 |                     |                      |                                                                                                                                                                                                                                                                                |                |  |
| 44 |                     |                      |                                                                                                                                                                                                                                                                                |                |  |
| 45 |                     |                      |                                                                                                                                                                                                                                                                                |                |  |
| 46 |                     |                      |                                                                                                                                                                                                                                                                                |                |  |
| 47 |                     |                      |                                                                                                                                                                                                                                                                                |                |  |
| 48 |                     |                      |                                                                                                                                                                                                                                                                                |                |  |
| 49 |                     |                      |                                                                                                                                                                                                                                                                                |                |  |
| 50 |                     |                      |                                                                                                                                                                                                                                                                                |                |  |
| 51 |                     |                      |                                                                                                                                                                                                                                                                                |                |  |
| 52 |                     | <a href="#">#14b</a> | Indicate number of participants with missing data for each variable of interest                                                                                                                                                                                                | 8, 9 in tables |  |
| 53 |                     |                      |                                                                                                                                                                                                                                                                                |                |  |
| 54 |                     |                      |                                                                                                                                                                                                                                                                                |                |  |
| 55 |                     |                      |                                                                                                                                                                                                                                                                                |                |  |
| 56 |                     |                      |                                                                                                                                                                                                                                                                                |                |  |
| 57 | Outcome data        | <a href="#">#15</a>  | Report numbers of outcome events or summary measures.                                                                                                                                                                                                                          | na             |  |
| 58 |                     |                      |                                                                                                                                                                                                                                                                                |                |  |
| 59 |                     |                      |                                                                                                                                                                                                                                                                                |                |  |
| 60 |                     |                      |                                                                                                                                                                                                                                                                                |                |  |

|    |                  |                                                                                        |        |
|----|------------------|----------------------------------------------------------------------------------------|--------|
| 1  |                  | Give information separately for exposed and unexposed                                  |        |
| 2  |                  | groups if applicable.                                                                  |        |
| 3  |                  |                                                                                        |        |
| 4  |                  |                                                                                        |        |
| 5  |                  |                                                                                        |        |
| 6  | Main results     | <a href="#">#16a</a> Give unadjusted estimates and, if applicable, confounder-         | 7 - 10 |
| 7  |                  | adjusted estimates and their precision (eg, 95% confidence                             |        |
| 8  |                  | interval). Make clear which confounders were adjusted for and                          |        |
| 9  |                  | why they were included                                                                 |        |
| 10 |                  |                                                                                        |        |
| 11 |                  |                                                                                        |        |
| 12 |                  |                                                                                        |        |
| 13 |                  |                                                                                        |        |
| 14 |                  |                                                                                        |        |
| 15 |                  |                                                                                        |        |
| 16 |                  | <a href="#">#16b</a> Report category boundaries when continuous variables were         |        |
| 17 |                  | categorized                                                                            |        |
| 18 |                  |                                                                                        |        |
| 19 |                  |                                                                                        |        |
| 20 |                  |                                                                                        |        |
| 21 |                  | <a href="#">#16c</a> If relevant, consider translating estimates of relative risk into |        |
| 22 |                  | absolute risk for a meaningful time period                                             |        |
| 23 |                  |                                                                                        |        |
| 24 |                  |                                                                                        |        |
| 25 |                  |                                                                                        |        |
| 26 | Other analyses   | <a href="#">#17</a> Report other analyses done—e.g., analyses of subgroups and         | 10 -16 |
| 27 |                  | interactions, and sensitivity analyses                                                 |        |
| 28 |                  |                                                                                        |        |
| 29 |                  |                                                                                        |        |
| 30 |                  |                                                                                        |        |
| 31 |                  |                                                                                        |        |
| 32 | Key results      | <a href="#">#18</a> Summarise key results with reference to study objectives           |        |
| 33 |                  |                                                                                        |        |
| 34 |                  |                                                                                        |        |
| 35 | Limitations      | <a href="#">#19</a> Discuss limitations of the study, taking into account sources of   | 18     |
| 36 |                  | potential bias or imprecision. Discuss both direction and                              |        |
| 37 |                  | magnitude of any potential bias.                                                       |        |
| 38 |                  |                                                                                        |        |
| 39 |                  |                                                                                        |        |
| 40 |                  |                                                                                        |        |
| 41 |                  |                                                                                        |        |
| 42 | Interpretation   | <a href="#">#20</a> Give a cautious overall interpretation considering objectives,     | 16 -18 |
| 43 |                  | limitations, multiplicity of analyses, results from similar studies,                   |        |
| 44 |                  | and other relevant evidence.                                                           |        |
| 45 |                  |                                                                                        |        |
| 46 |                  |                                                                                        |        |
| 47 |                  |                                                                                        |        |
| 48 |                  |                                                                                        |        |
| 49 |                  |                                                                                        |        |
| 50 | Generalisability | <a href="#">#21</a> Discuss the generalisability (external validity) of the study      | 19     |
| 51 |                  | results                                                                                |        |
| 52 |                  |                                                                                        |        |
| 53 |                  |                                                                                        |        |
| 54 |                  |                                                                                        |        |
| 55 | Funding          | <a href="#">#22</a> Give the source of funding and the role of the funders for the     | 20     |
| 56 |                  | present study and, if applicable, for the original study on which                      |        |
| 57 |                  |                                                                                        |        |
| 58 |                  |                                                                                        |        |
| 59 |                  |                                                                                        |        |
| 60 |                  |                                                                                        |        |

1 the present article is based

2  
3  
4 The STROBE checklist is distributed under the terms of the Creative Commons Attribution License  
5  
6 CC-BY. This checklist can be completed online using <https://www.goodreports.org/>, a tool made by  
7  
8 the [EQUATOR Network](#) in collaboration with [Penelope.ai](#)  
9  
10  
11  
12  
13  
14  
15  
16  
17  
18  
19  
20  
21  
22  
23  
24  
25  
26  
27  
28  
29  
30  
31  
32  
33  
34  
35  
36  
37  
38  
39  
40  
41  
42  
43  
44  
45  
46  
47  
48  
49  
50  
51  
52  
53  
54  
55  
56  
57  
58  
59  
60
